# Supplementary material for: Aromaticity and sterics control whether a cationic olefin radical is resistant to disproportionation
Source: Royal Society of Chemistry journal article supplement (doi:10.1039/d0sc00699h), 2020-01-01
Supplement: d0sc00699h1.pdf [file d0sc00699h1.pdf]

# Aromaticity and Sterics Control Whether a Cationic Olefin Radical is Resistant to Disproportionation

## Electronic Supplementary Information (ESI)

Julian Messelberger,<sup>†</sup> Annette Grünwald,<sup>†</sup> Stephen J. Goodner, Florian Zeilinger, Piermaria Pinter, Matthias E. Miehlich, Frank W. Heinemann, Max M. Hansmann and Dominik Munz<sup>\*</sup>

### Contents

|                                                                          |     |
|--------------------------------------------------------------------------|-----|
| 1. NMR Spectra                                                           | S2  |
| 2. Electrochemical Studies                                               | S6  |
| 3. X-ray Crystallographic Data of Radical Cation <b>18<sup>rad</sup></b> | S9  |
| 4. Computational Details                                                 | S13 |
| 5. References                                                            | S52 |

## 1. NMR Spectra

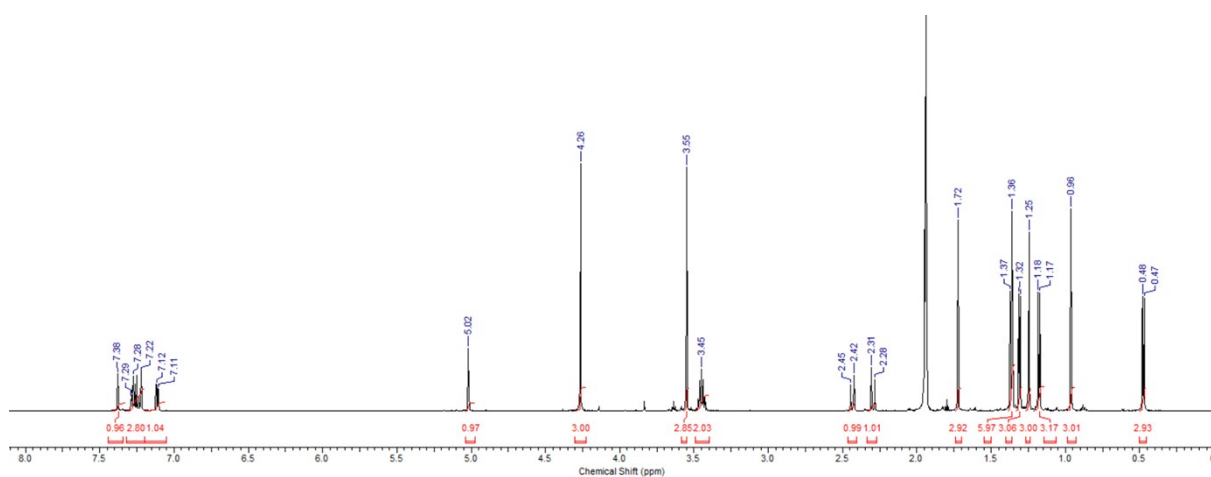

Figure S1.  $^1\text{H}$  NMR spectrum of **17** ( $\text{CD}_3\text{CN}$ , 600.1 MHz).

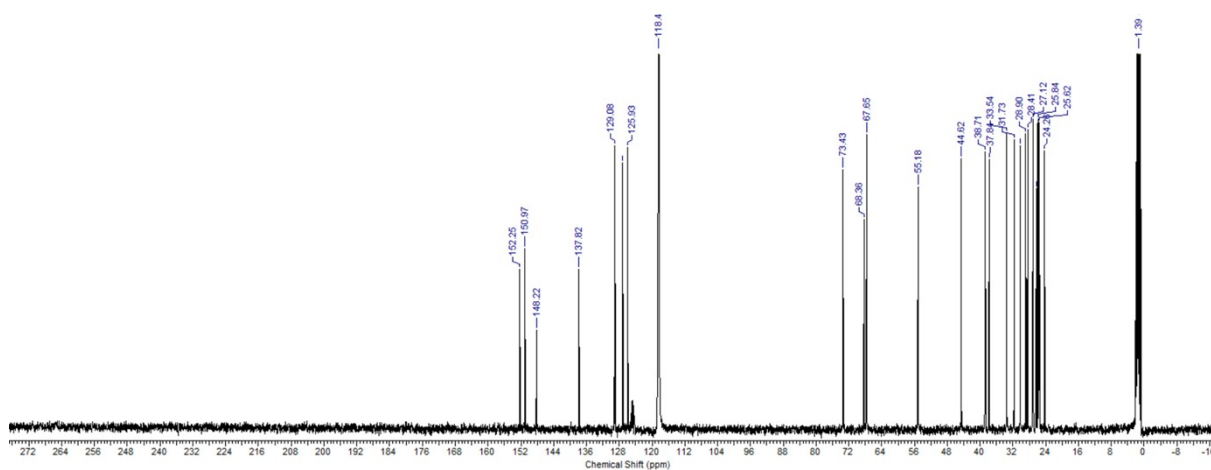

Figure S2.  $^{13}\text{C}$  NMR spectrum of **17** ( $\text{CD}_3\text{CN}$ , 100.6 MHz).

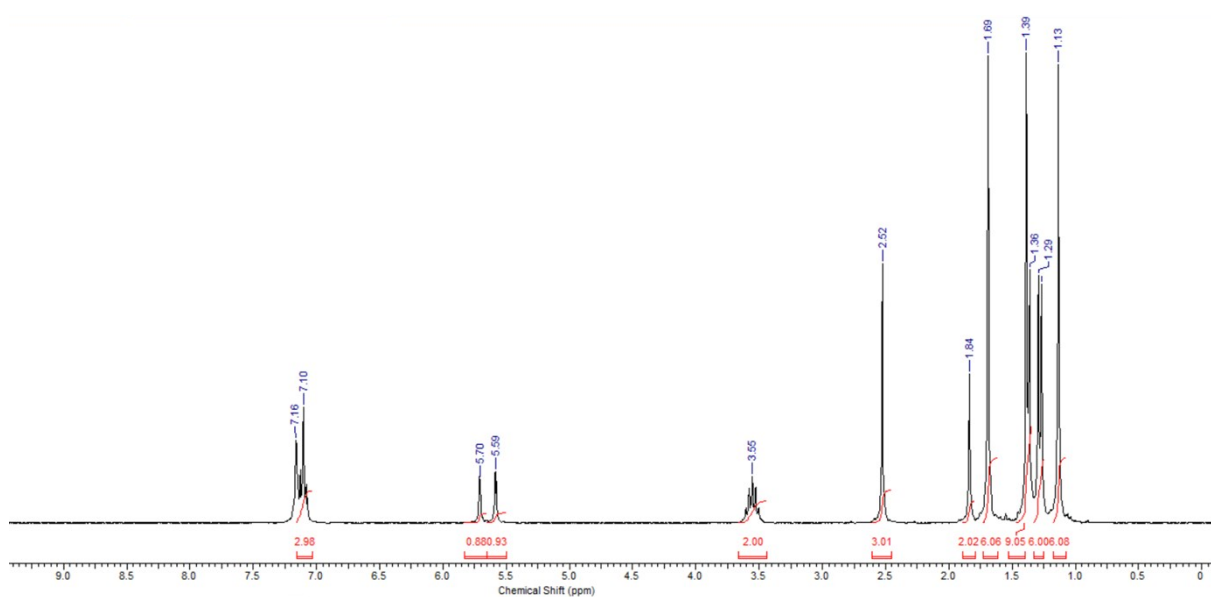

Figure S3.  $^1\text{H}$  NMR spectrum of **18** ( $\text{C}_6\text{D}_6$ , 269.7 MHz).

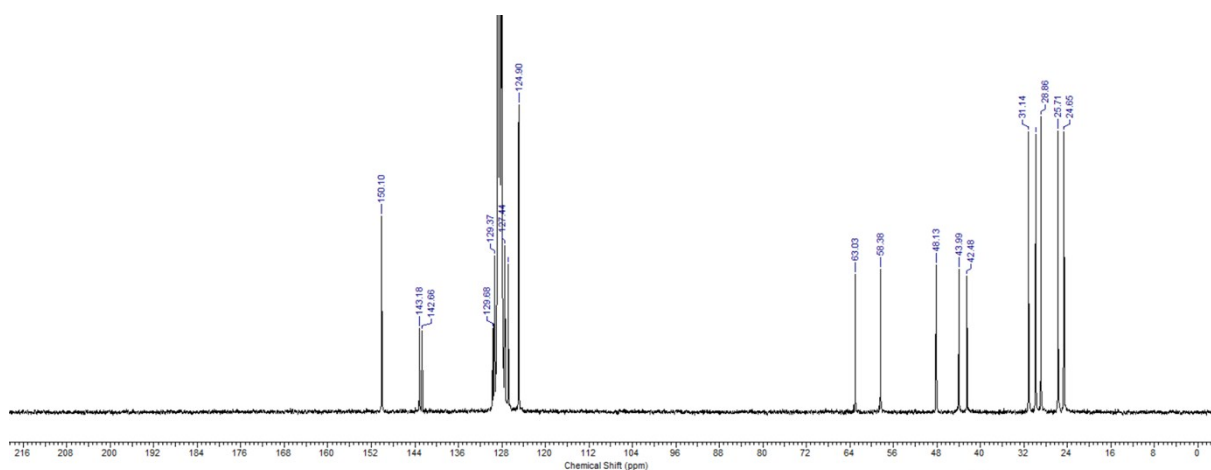

**Figure S4.** <sup>13</sup>C NMR spectrum of **18** (C<sub>6</sub>D<sub>6</sub>, 67.8 MHz).

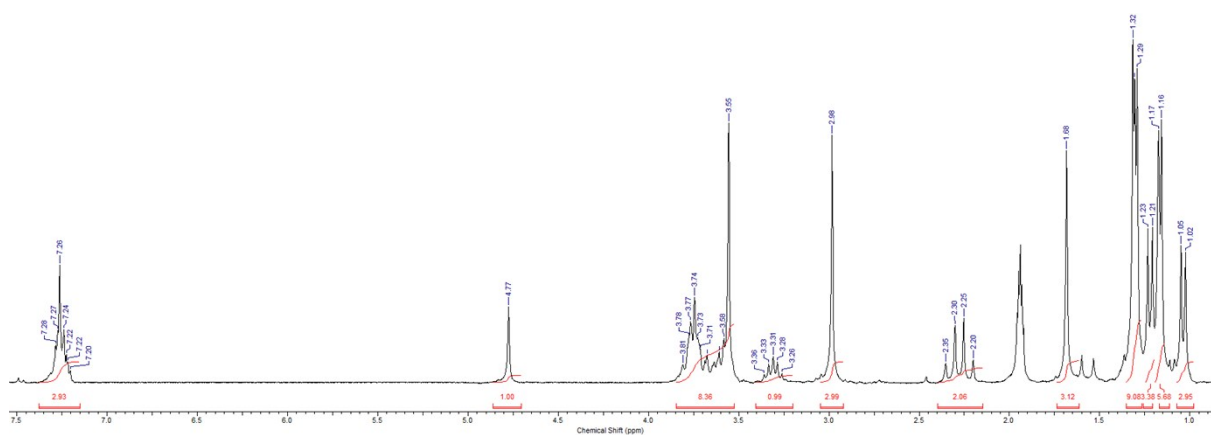

**Figure S5.** <sup>1</sup>H NMR spectrum of **21** (CD<sub>3</sub>CN, 269.7 MHz).

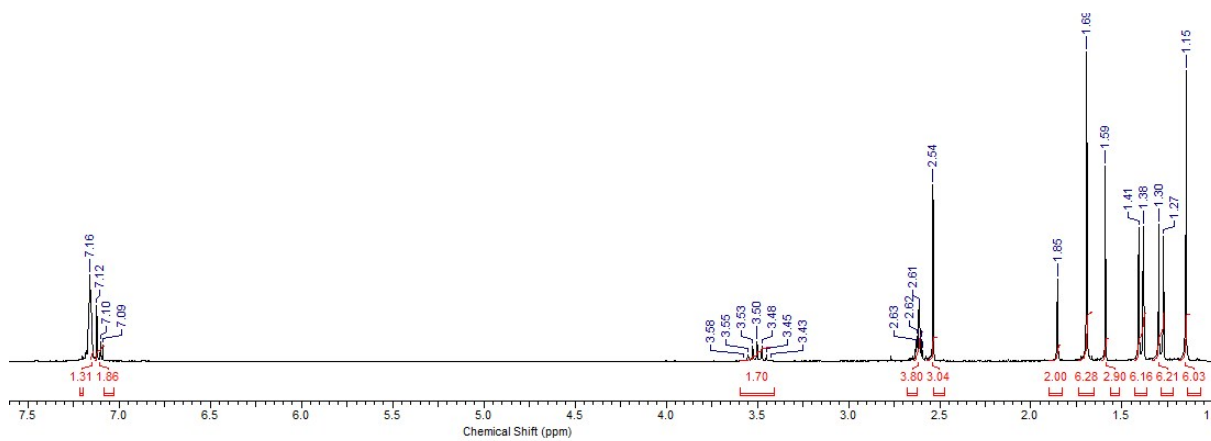

**Figure S6.** <sup>1</sup>H NMR spectrum of **22** (C<sub>6</sub>D<sub>6</sub>, 269.7 MHz).

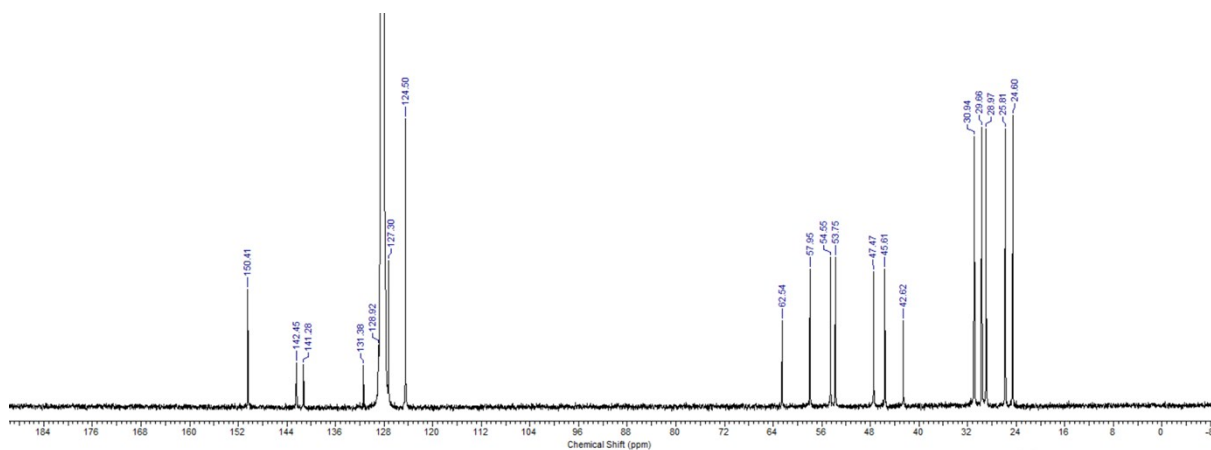

Figure S7.  $^{13}\text{C}$  NMR spectrum of **22** ( $\text{C}_6\text{D}_6$ , 100.6 MHz).

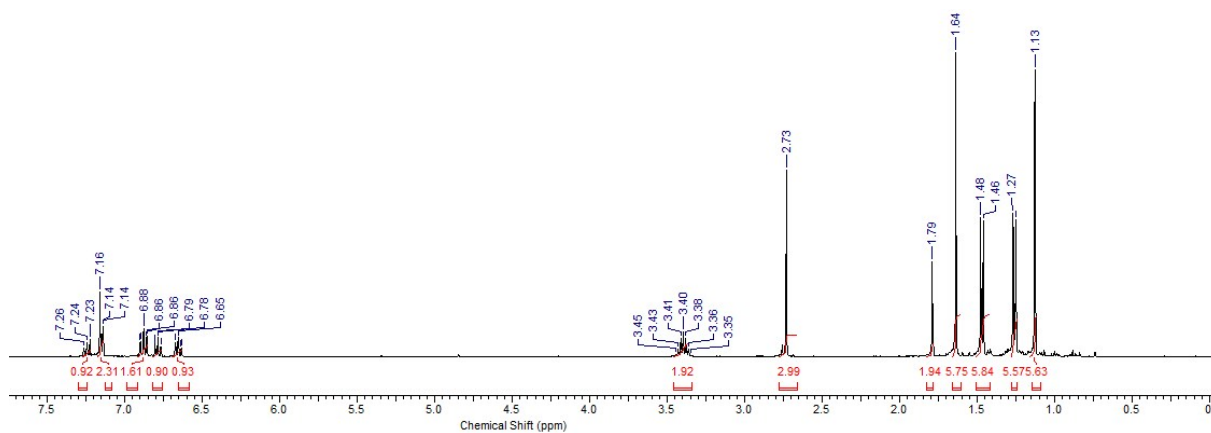

Figure S8.  $^1\text{H}$  NMR spectrum of **25** ( $\text{C}_6\text{D}_6$ , 399.8 MHz).

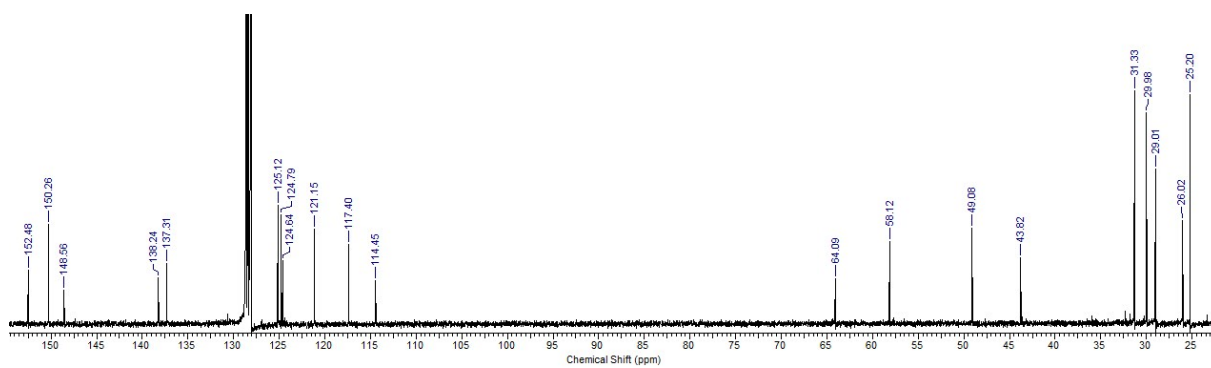

Figure S9.  $^{13}\text{C}$  NMR spectrum of **25** ( $\text{C}_6\text{D}_6$ , 100.6 MHz).

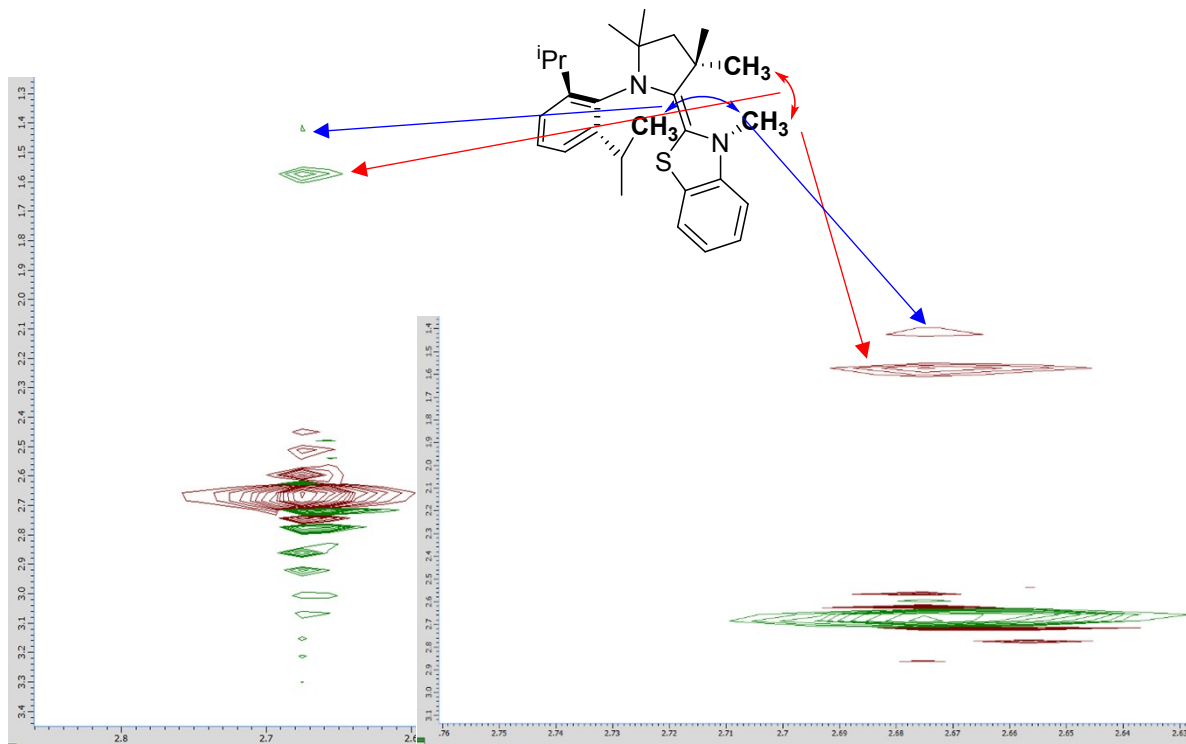

**Figure S10.** ROESY (left) and NOESY (right) spectra of **21** ( $C_6D_6$ , 399.8 MHz), which indicate strong coupling of the *N*-methyl substituent with the methyl groups of the CAAC (calculated distance: 2.20 Å) and weak coupling with one *i*Pr group of the Dipp substituent (calculated distance: 2.68 Å).

## 2. Electrochemical Studies

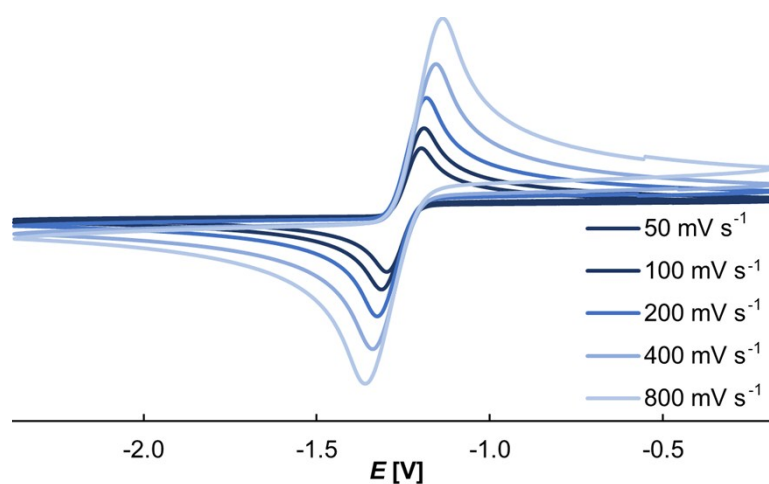

**Figure S11.** Cyclic voltammogram of **9** at various scan rates ( $n\text{Bu}_4\text{PF}_6$  0.1 M in DMF, vs. Fc/Fc<sup>+</sup>).

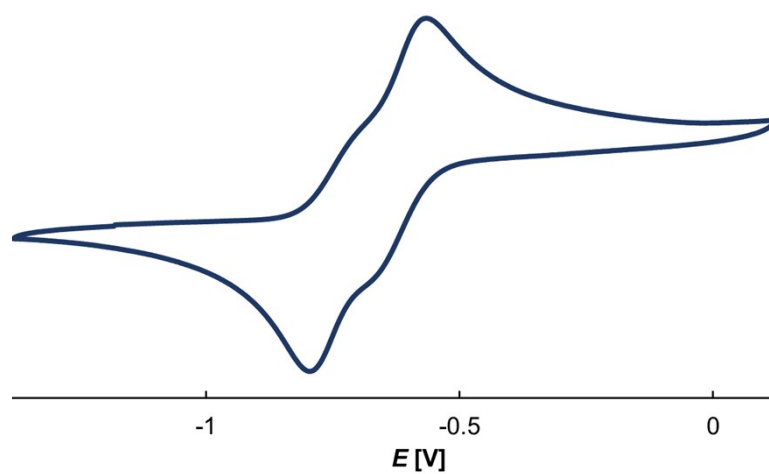

**Figure S12.** Cyclic voltammogram of Ph<sup>h</sup>**9** at 50 mV s<sup>-1</sup> ( $n\text{Bu}_4\text{PF}_6$  0.1 M in CH<sub>2</sub>Cl<sub>2</sub>, vs. Fc/Fc<sup>+</sup>).

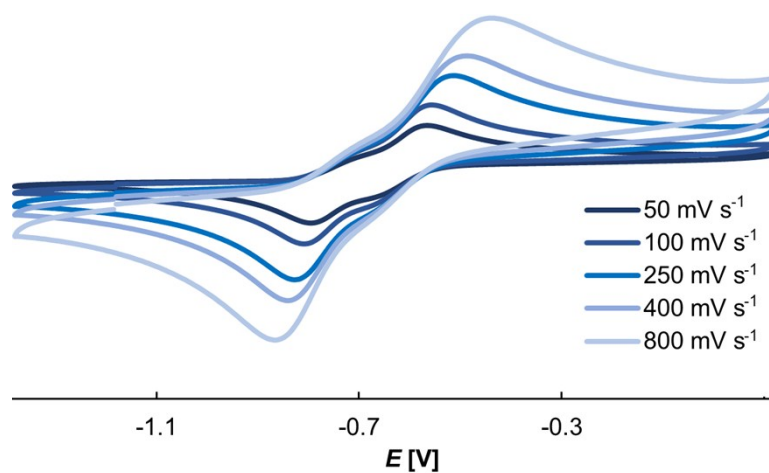

**Figure S13.** Cyclic voltammogram of Ph<sup>h</sup>**9** at various scan rates ( $n\text{Bu}_4\text{PF}_6$  0.1 M in CH<sub>2</sub>Cl<sub>2</sub>, vs. Fc/Fc<sup>+</sup>).

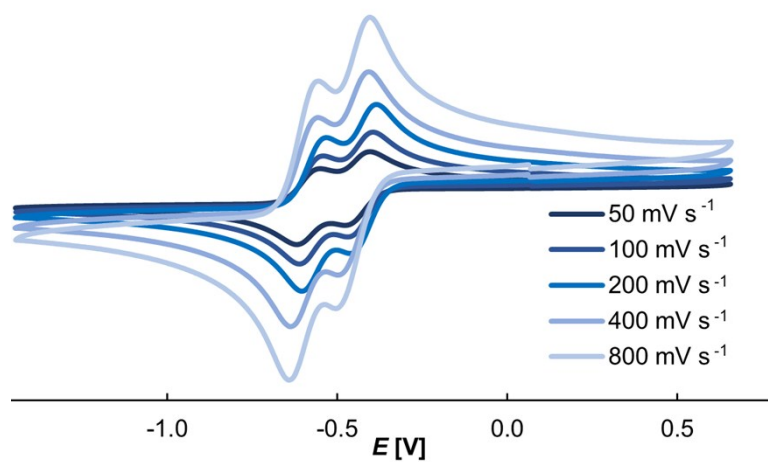

**Figure S14.** Cyclic voltammogram of **13** at various scan rates ( $n\text{Bu}_4\text{PF}_6$  0.1 M in MeCN, vs. Fc/Fc<sup>+</sup>).

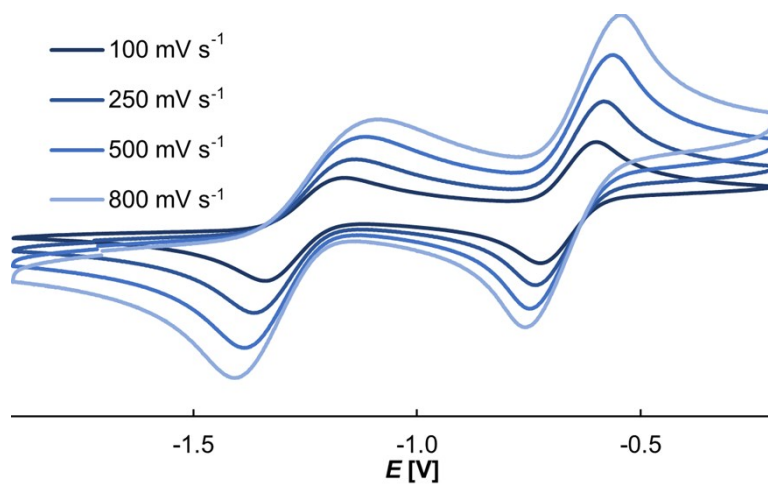

**Figure S15.** Cyclic voltammogram of **18** at various scan rates ( $n\text{Bu}_4\text{PF}_6$  0.1 M in THF, vs. Fc/Fc<sup>+</sup>).

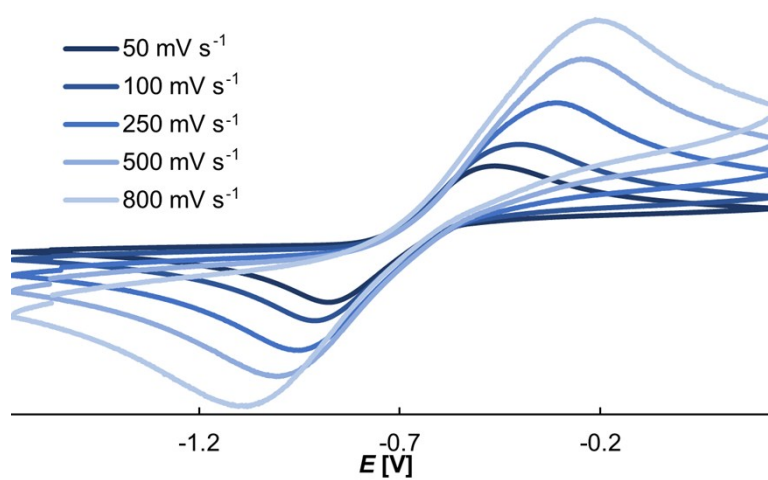

**Figure S16.** Cyclic voltammogram of **22** at various scan rates ( $n\text{Bu}_4\text{PF}_6$  0.1 M in THF, vs. Fc/Fc<sup>+</sup>).

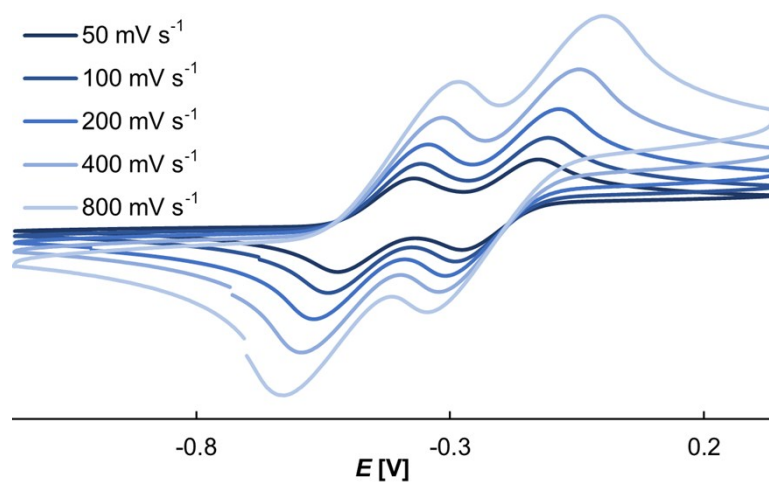

**Figure S17.** Cyclic voltammogram of **25** at various scan rates ( $n\text{Bu}_4\text{PF}_6$  0.1 M in THF, vs.  $\text{Fc}/\text{Fc}^+$ ).

|                          | THF                                            |                                                |            | DMF                                        |                                            |            | MeCN                           |                                 |            | DCM                          |                              |            |
|--------------------------|------------------------------------------------|------------------------------------------------|------------|--------------------------------------------|--------------------------------------------|------------|--------------------------------|---------------------------------|------------|------------------------------|------------------------------|------------|
|                          | $E_{1,2}$                                      | $E_{2,3}$                                      | $\Delta E$ | $E_{1,2}$                                  | $E_{2,3}$                                  | $\Delta E$ | $E_{1,2}$                      | $E_{2,3}$                       | $\Delta E$ | $E_{1,2}$                    | $E_{2,3}$                    | $\Delta E$ |
| <b>1</b>                 | 0.71 <sup>1</sup>                              | 0.45 <sup>1</sup>                              | 0.26       | 0.58 <sup>2</sup>                          | 0.19 <sup>2</sup>                          | 0.39       | 0.71 <sup>3</sup>              | 0.32 <sup>3</sup>               | 0.39       | irrev.,<br>n.a. <sup>1</sup> | irrev.,<br>n.a. <sup>1</sup> | –          |
| <b>3</b>                 | 0.98<br>(irrev.,<br>peak<br>pot.) <sup>4</sup> | 0.64<br>(irrev.,<br>peak<br>pot.) <sup>4</sup> | 0.34       | 0.88 <sup>4</sup>                          | 0.65 <sup>4</sup>                          | 0.23       | 0.89 <sup>5</sup>              | 0.55 <sup>5</sup>               | 0.34       | 1.11 <sup>6</sup>            | 0.68 <sup>6</sup>            | 0.43       |
| <b>4</b>                 | –                                              | –                                              | –          | 0.84 <sup>7</sup>                          | 0.42 <sup>7</sup>                          | 0.42       | 0.81 <sup>7</sup>              | 0.40 <sup>7</sup>               | 0.41       | –                            | –                            | –          |
| Pr-<br>teth<br><b>8</b>  | –                                              | –                                              | –          | -1.20 <sup>8</sup> /<br>-1.08 <sup>9</sup> | -1.20 <sup>8</sup> /<br>-1.08 <sup>9</sup> | 0          | -1.37<br>(irrev.) <sup>8</sup> | -1.18 <sup>8</sup>              | 0.19       | –                            | –                            | –          |
| <b>9</b>                 | -0.61<br>(irrev.)                              | -0.61<br>(irrev.)                              | 0          | -0.71                                      | -0.71                                      | 0          | –                              | –                               | –          | –                            | –                            | –          |
| Ph <b>9</b>              | -1.28<br>(quasi<br>rev.)                       | -1.28<br>(quasi<br>rev.)                       | 0          | -1.28<br>(irrev.)                          | -1.28<br>(irrev.)                          | 0          | broad,<br>undefined<br>signal  | broad, un-<br>defined<br>signal | –          | -1.19                        | -1.09                        | 0.10       |
| <b>10</b>                | –                                              | –                                              | –          | -0.84 <sup>10</sup>                        | -0.84 <sup>10</sup>                        | 0          | -0.90 <sup>10</sup>            | -0.90 <sup>10</sup>             | 0          | –                            | –                            | –          |
| Pr-<br>teth<br><b>10</b> | –                                              | –                                              | –          | -0.62 <sup>8</sup>                         | -0.84 <sup>8</sup>                         | 0.22       | -0.64 <sup>8</sup>             | -0.93 <sup>8</sup>              | 0.29       | –                            | –                            | –          |

**Table S1.** Potentials of homodimers **1**, **3**, **4**, **9**, Ph**9**, and **10** in different solvents vs. SCE in [V].



### 3. X-ray Crystallographic Data of Radical Cation **18<sup>rad</sup>**

CCDC-1964614 and CCDC-1964615 contains the supplementary crystallographic data for this paper. The data can be obtained free of charge from Cambridge Crystallographic Data Centre, 12 Union Road, Cambridge, CB2 1EZ, UK (fax: ++33-1223-336-033; e-mail: deposit@ccdc.cam.ac.uk).

Single crystals of **18<sup>rad</sup>** were obtained by slow diffusion of diethyl ether into a tetrahydrofuran solution of **18<sup>rad</sup>**. In the crystallization flask two different types of crystals were observed: red prisms and orange needles. A specimen of both crystal types was investigated by small molecule single crystal X-ray diffraction and it turned out that they represented different polymorphs of the same compound. For the preparation the sample was coated with protective perfluoropolyalkylether oil. A suitable single each crystal was selected, mounted on a MiTeGen micro mount and transferred to the cold nitrogen gas stream of the diffractometer. Intensity data were collected at 100 K on a Bruker Kappa Photon 2 *I* $\mu$ S Duo diffractometer equipped with QUAZAR focusing Montel optics using MoK $\alpha$  radiation ( $\lambda = 0.71073 \text{ \AA}$ ). Data were corrected for Lorentz and polarization effects; semiempirical absorption corrections were performed on the basis of multiple scans using SADABS.<sup>11</sup> The structure was solved by direct methods (*SHELXT*)<sup>12</sup> and refined by full-matrix least-squares procedures on  $F^2$  using *SHELXL 2014/6*.<sup>13</sup> *OLEX2* was used to prepare material for publication.<sup>14</sup>

#### Polymorph A, CCDC-1964614

The triflate anion was disordered. Two alternative orientations were refined and resulted in site occupancies of 49.2(2) and 50.8(2) % for the atoms, S1, C26, O1 – O3, F1 – F3 and S1A, C26A, O1A – O3A, F1A – F3A, respectively. Similarity restraints were applied to the anisotropic displacement parameters of the atoms C26 and C26A (see Fig. S18). Treatment of hydrogen atoms: All hydrogen atoms were placed in positions of optimized geometry, their isotropic displacement parameters were tied to those of their corresponding carrier atoms by a factor of 1.2 or 1.5.

|                                    |                                                                                |
|------------------------------------|--------------------------------------------------------------------------------|
| Identification code                | <b>18<sup>rad</sup></b>                                                        |
| Empirical formula                  | C <sub>26</sub> H <sub>39</sub> N <sub>3</sub> F <sub>3</sub> O <sub>3</sub> S |
| Formula weight/g mol <sup>-1</sup> | 530.66                                                                         |
| Temperature/K                      | 100.15                                                                         |
| Crystal system                     | Monoclinic                                                                     |
| Space group                        | P2 <sub>1</sub> /n                                                             |
| <i>a</i> /Å                        | 11.3959(4)                                                                     |
| <i>b</i> /Å                        | 8.8582(3)                                                                      |
| <i>c</i> /Å                        | 26.7626(10)                                                                    |
| $\alpha$ /°                        | 90                                                                             |
| $\beta$ /°                         | 91.5800(10)                                                                    |

|                                                    |                                                                        |
|----------------------------------------------------|------------------------------------------------------------------------|
| $\gamma/^\circ$                                    | 90                                                                     |
| Volume/ $\text{\AA}^3$                             | 2700.58(17)                                                            |
| Z                                                  | 4                                                                      |
| $\rho_{\text{calc}}/\text{g/cm}^3$                 | 1.305                                                                  |
| $\mu/\text{mm}^{-1}$                               | 0.173                                                                  |
| F(000)                                             | 1132.0                                                                 |
| Crystal size/ $\text{mm}^3$                        | 0.17 $\times$ 0.15 $\times$ 0.11                                       |
| Radiation                                          | MoK $\alpha$ , $\lambda = 0.71073 \text{ \AA}$                         |
| 2 $\Theta$ range for data collection/ $^\circ$     | 4.76 $\leq$ 2 $\Theta$ $\leq$ 57.4                                     |
| Index ranges                                       | -15 $\leq$ h $\leq$ 15, -11 $\leq$ k $\leq$ 11, -36 $\leq$ l $\leq$ 36 |
| Reflections collected                              | 44464                                                                  |
| Independent reflections                            | 6963                                                                   |
| Data/restraints/parameters                         | 6963 / 0 / 408                                                         |
| Goodness-of-fit on F <sup>2</sup>                  | 1.051                                                                  |
| Final R indexes [ $I \geq 2\sigma(I)$ ]            | R <sub>1</sub> = 0.0416, wR <sub>2</sub> = 0.1005                      |
| Final R indexes [all data]                         | R <sub>1</sub> = 0.0538, wR <sub>2</sub> = 0.1100                      |
| Largest diff. Peak/hole/ $\text{e}\text{\AA}^{-3}$ | 0.41 / -0.29                                                           |

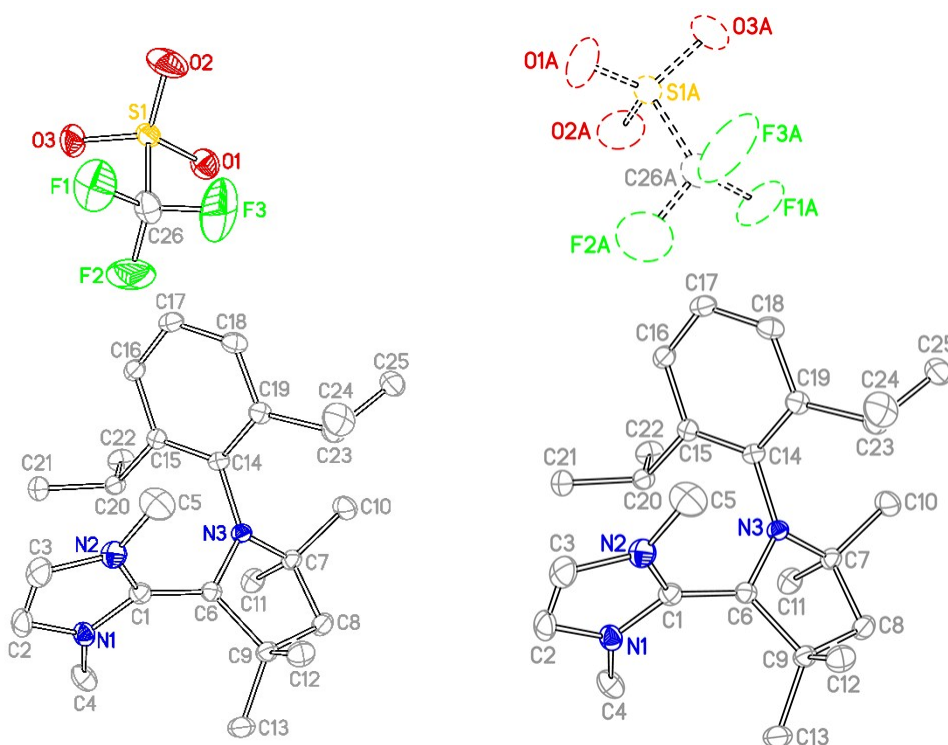

**Figure S18.** Thermal ellipsoid representation of the molecular structure of **18<sup>rad</sup>** with the applied numbering scheme (left and right pictures display the alternative orientations of the disordered triflate anion; 50% probability ellipsoids, hydrogen atoms are omitted for clarity).

## Polymorph B, CCDC-1964615

In this crystal structure the cation was disordered. Two alternative orientations were refined for the substituted pyrrolidine moiety and resulted in site occupancies of 47.4(5) and 52.6(5) % for the affected atoms, C8, C10, C11 and C8A, C10A, C11A, respectively (see Figure S19). Treatment of hydrogen atoms: All hydrogen atoms were placed in positions of optimized geometry, their isotropic displacement parameters were tied to those of their corresponding carrier atoms by a factor of 1.2 or 1.5.

|                                      |                                                                                |
|--------------------------------------|--------------------------------------------------------------------------------|
| Identification code                  | <b>18<sup>rad</sup></b>                                                        |
| Empirical formula                    | C <sub>26</sub> H <sub>39</sub> N <sub>3</sub> F <sub>3</sub> O <sub>3</sub> S |
| Formula weight/g mol <sup>-1</sup>   | 530.66                                                                         |
| Temperature/K                        | 100.15                                                                         |
| Crystal system                       | Monoclinic                                                                     |
| Space group                          | P2 <sub>1</sub> /n                                                             |
| a/Å                                  | 14.9305(9)                                                                     |
| b/Å                                  | 11.6700(7)                                                                     |
| c/Å                                  | 16.4062(9)                                                                     |
| α/°                                  | 90                                                                             |
| β/°                                  | 109.508(2)                                                                     |
| γ/°                                  | 90                                                                             |
| Volume/Å <sup>3</sup>                | 2694.4(3)                                                                      |
| Z                                    | 4                                                                              |
| ρ <sub>calc</sub> /g/cm <sup>3</sup> | 1.308                                                                          |
| μ/mm <sup>-1</sup>                   | 0.173                                                                          |
| F(000)                               | 1132.0                                                                         |
| Crystal size/mm <sup>3</sup>         | 0.24×0.07×0.05                                                                 |
| Radiation                            | MoKα, λ = 0.71073 Å                                                            |
| 2θ range for data collection/°       | 4.37 ≤ 2θ ≤ 55.75                                                              |
| Index ranges                         | -19 ≤ h ≤ 19, -15 ≤ k ≤ 15, -21 ≤ l ≤ 21                                       |
| Reflections collected                | 94277                                                                          |
| Independent reflections              | 6421                                                                           |
| Data/restraints/parameters           | 6421 / 0 / 365                                                                 |
| Goodness-of-fit on F <sup>2</sup>    | 1.083                                                                          |

Final R indexes [ $I \geq 2\sigma(I)$ ]

$R_1 = 0.0577$ ,  $wR_2 = 0.1268$

Final R indexes [all data]

$R_1 = 0.0642$ ,  $wR_2 = 0.1305$

Largest diff. Peak/hole/ $e\text{\AA}^{-3}$

0.68 / -0.65

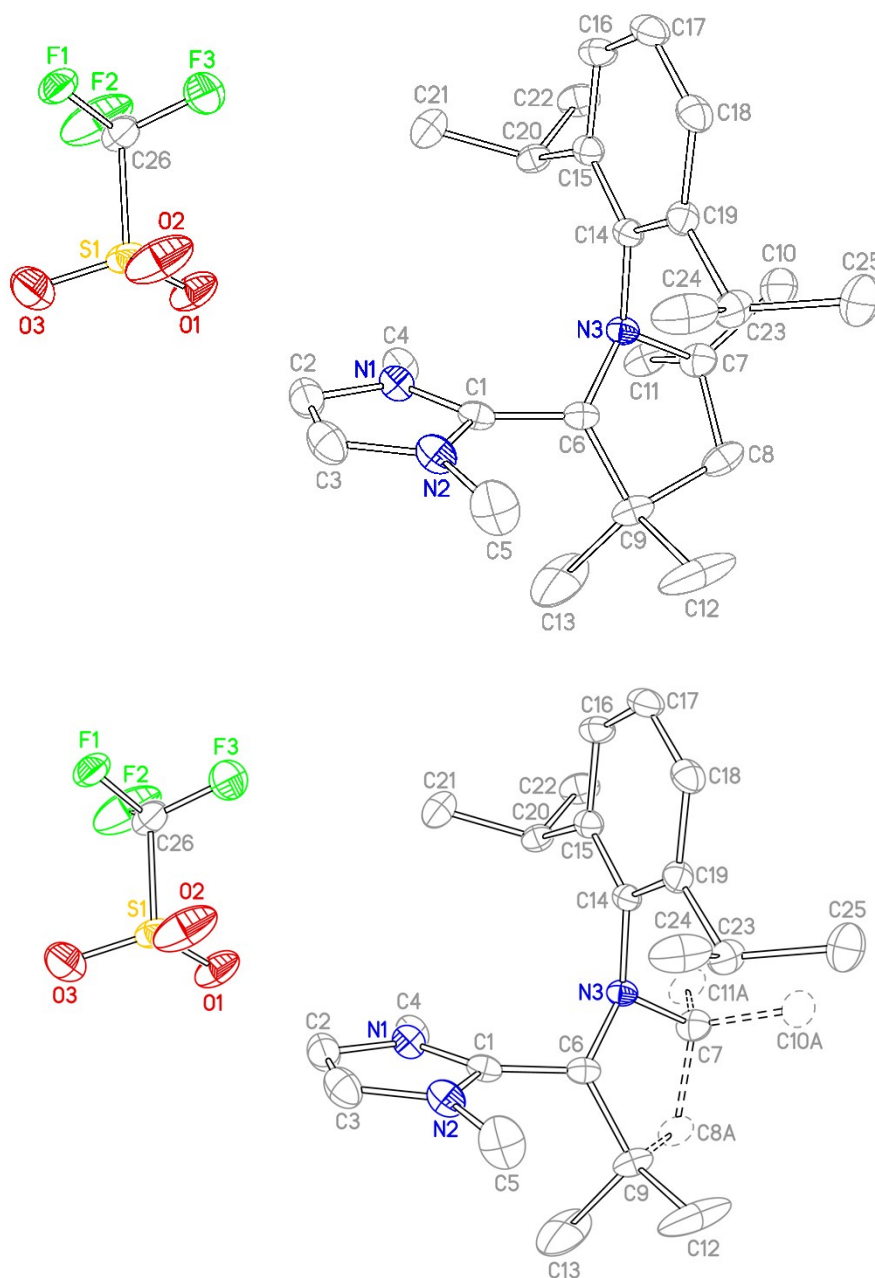

**Figure S19.** Thermal ellipsoid representation of the molecular structure of **18<sup>rad</sup>** in crystals with the applied numbering scheme (top and bottom pictures display the alternative orientations of the disordered cation; 50% probability ellipsoids, hydrogen atoms are omitted for clarity).

## 4. Computational Details

|                              | $\Delta\mu^\circ$<br>(calc.)<br>[eV] | $\Delta E$<br>(exp.)<br>[V] | $\Delta E$<br>(fit)<br>[V] | Root-<br>mean-<br>square<br>devia-<br>tion<br>(RMSD)<br>[V] | RMSD<br>(aver-<br>aged)<br>[V] | Mean<br>absol-<br>ute de-<br>viation<br>(MAD)<br>[V] | MAD<br>(aver-<br>aged)<br>[V] | RMSD<br>(fit)<br>[V] | RMSD<br>(fit, a-<br>ver-<br>aged)<br>[V] | MAD<br>(fit)<br>[V] | MAD<br>(fit, a-<br>ver-<br>aged)<br>[V] |
|------------------------------|--------------------------------------|-----------------------------|----------------------------|-------------------------------------------------------------|--------------------------------|------------------------------------------------------|-------------------------------|----------------------|------------------------------------------|---------------------|-----------------------------------------|
| Homodimers                   |                                      |                             |                            |                                                             | 0.10                           |                                                      | 0.09                          |                      | 0.09                                     |                     | 0.07                                    |
| <b>1</b>                     | 0.36                                 | 0.39 <sup>3</sup>           | 0.39                       | 0.09                                                        | 0.10                           | 0.07                                                 | 0.09                          | 0.07                 | 0.09                                     | 0.06                | 0.07                                    |
| <b>2</b>                     | 0.45                                 | 0.45 <sup>15</sup>          | 0.46                       |                                                             |                                |                                                      |                               |                      |                                          |                     |                                         |
| <b>3</b>                     | 0.38                                 | 0.33 <sup>5</sup>           | 0.40                       |                                                             |                                |                                                      |                               |                      |                                          |                     |                                         |
| <b>4</b>                     | 0.31                                 | 0.41 <sup>7</sup>           | 0.34                       |                                                             |                                |                                                      |                               |                      |                                          |                     |                                         |
| <b>5</b>                     | 0.02                                 | 0.07 <sup>16</sup>          | 0.10                       |                                                             |                                |                                                      |                               |                      |                                          |                     |                                         |
| <b>6</b>                     | -0.33                                | 0 <sup>17</sup>             | -                          |                                                             |                                |                                                      |                               |                      |                                          |                     |                                         |
| <b>7</b>                     | 0.22                                 | 0.30 <sup>18</sup>          | 0.27                       |                                                             |                                |                                                      |                               |                      |                                          |                     |                                         |
| <b>8</b>                     | -0.22                                | 0 <sup>19</sup>             | -                          |                                                             |                                |                                                      |                               |                      |                                          |                     |                                         |
| <b>9</b>                     | -0.96                                | 0                           | -                          |                                                             |                                |                                                      |                               |                      |                                          |                     |                                         |
| <b>Ph9</b>                   | -0.09                                | 0.10                        | 0.08                       |                                                             |                                |                                                      |                               |                      |                                          |                     |                                         |
| <b>10</b>                    | -0.05                                | 0 <sup>10</sup>             | 0.04                       |                                                             |                                |                                                      |                               |                      |                                          |                     |                                         |
| <b>11</b>                    | 0.03                                 | 0.13 <sup>20</sup>          | 0.10                       |                                                             |                                |                                                      |                               |                      |                                          |                     |                                         |
| <b>12</b>                    | 0.02                                 | n. a.                       | n. a.                      |                                                             |                                |                                                      |                               |                      |                                          |                     |                                         |
| <b>13</b>                    | 0.06                                 | 0.14                        | 0.12                       |                                                             |                                |                                                      |                               |                      |                                          |                     |                                         |
| Tethered homodimers          |                                      |                             |                            |                                                             |                                |                                                      |                               |                      |                                          |                     |                                         |
| <b>Et-teth6</b>              | 0.18                                 | 0.23 <sup>17</sup>          | 0.15                       | 0.08                                                        |                                | 0.06                                                 |                               | 0.05                 |                                          | 0.04                |                                         |
| <b>Pr-teth6</b>              | 0.05                                 | 0 <sup>9</sup>              | 0.06                       |                                                             |                                |                                                      |                               |                      |                                          |                     |                                         |
| <b>Et-teth8<sup>c</sup></b>  | 0.41                                 | (0.36) <sup>a</sup>         | -                          |                                                             |                                |                                                      |                               |                      |                                          |                     |                                         |
| <b>Pr-teth8<sup>c</sup></b>  | 0.27                                 | 0.19 <sup>8</sup>           | 0.18                       |                                                             |                                |                                                      |                               |                      |                                          |                     |                                         |
| <b>Et-teth10<sup>c</sup></b> | 0.43                                 | (0.91) <sup>b</sup>         | -                          |                                                             |                                |                                                      |                               |                      |                                          |                     |                                         |
| <b>Pr-teth10<sup>c</sup></b> | 0.37                                 | 0.29 <sup>8</sup>           | 0.32                       |                                                             |                                |                                                      |                               |                      |                                          |                     |                                         |
| Heterodimers                 |                                      |                             |                            |                                                             |                                |                                                      |                               |                      |                                          |                     |                                         |
| <b>14</b>                    | 0.19                                 | 0.34 <sup>21</sup>          | 0.30                       | 0.15                                                        |                                | 0.14                                                 |                               | 0.14                 |                                          | 0.10                |                                         |
| <b>18</b>                    | 0.42                                 | 0.60                        | 0.60                       |                                                             |                                |                                                      |                               |                      |                                          |                     |                                         |
| <b>22</b>                    | -0.31                                | 0                           | -                          |                                                             |                                |                                                      |                               |                      |                                          |                     |                                         |
| <b>25</b>                    | 0.17                                 | 0.26                        | 0.29                       |                                                             |                                |                                                      |                               |                      |                                          |                     |                                         |

**Table S2.** Calculated  $\Delta\mu^\circ$  and experimentally determined  $\Delta E$  as well as the fitted  $\Delta E$  values for all dimers. Fit parameters:  $\Delta E(\text{homodimers}) = 0.8509 \Delta\mu^\circ + 0.0775$ ;  $\Delta E(\text{tethered homodimers}) = 0.7098 \Delta\mu^\circ + 0.0225$ ;  $\Delta E(\text{heterodimers}) = 1.2611 \Delta\mu^\circ + 0.0753$ . For the the RMSD and MAD values, only dimers which form a radical cation with (borderline) stability towards disproportionation were taken into account. [a] To the best of our knowledge,  $\text{Et-teth8}$  and its electrochemical properties has not been reported. Therefore, the potential of the ethylene-propylene linked dimer  $\text{Et,Pr-teth8}^{\text{rad}}$  is used. [b] Hünig and coworkers questioned the precision of  $E_{2,3}$ .<sup>8, 22</sup> [c] Two conformers of comparable energy ( $\Delta G < 1 \text{ kcal mol}^{-1}$ ) were calculated for  $\text{Et-teth8}^{\text{rad}}$ ,  $\text{Pr-teth8}^{\text{rad}}$ ,  $\text{Et-teth10}^{\text{rad}}$ , and  $\text{Pr-teth10}^{\text{rad}}$ ; given values relate to the average.

## Additional Correlations

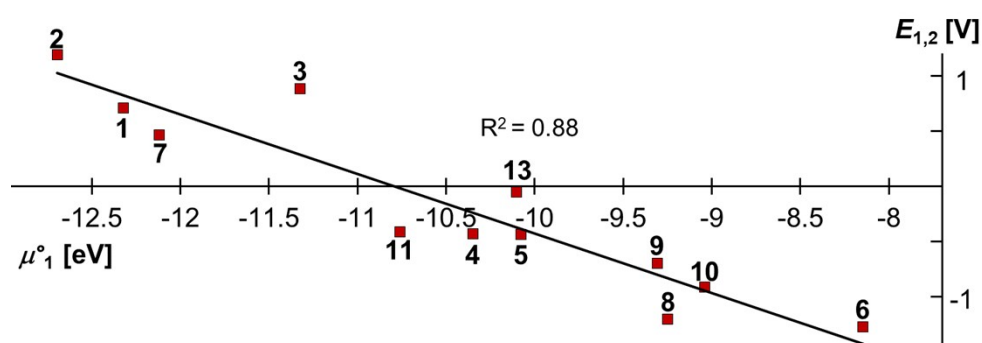

**Figure S20.** When approximating the electron affinity to the respective LUMO energies, the correlation is worse in comparison to the data depicted in Fig. 6. The experimentally determined potentials are referenced vs. SCE.

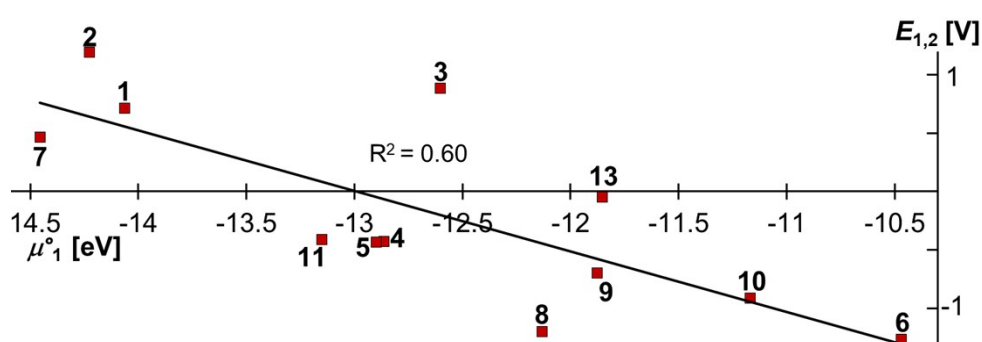

**Figure S21.** No satisfying correlation between experimental halfwave potentials of the first oxidation step for the homodimers and the chemical potential  $\mu^o_1$  was obtained when predicting the latter with Eq. 1. The experimentally determined potentials are referenced vs. SCE.

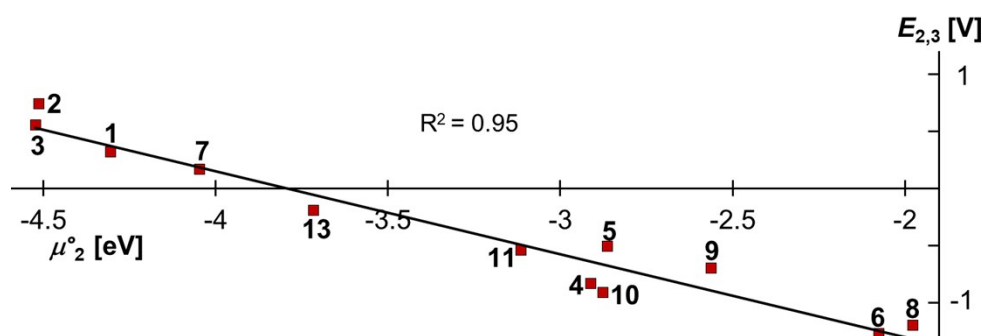

**Figure S22.** When using Eq. 2 instead of Eq. 1 for the prediction of the chemical potential  $\mu^o_2$ , the correlation with experimental halfwave potentials of the second oxidation step for the homodimers is slightly better. The experimentally determined potentials are referenced vs. SCE.

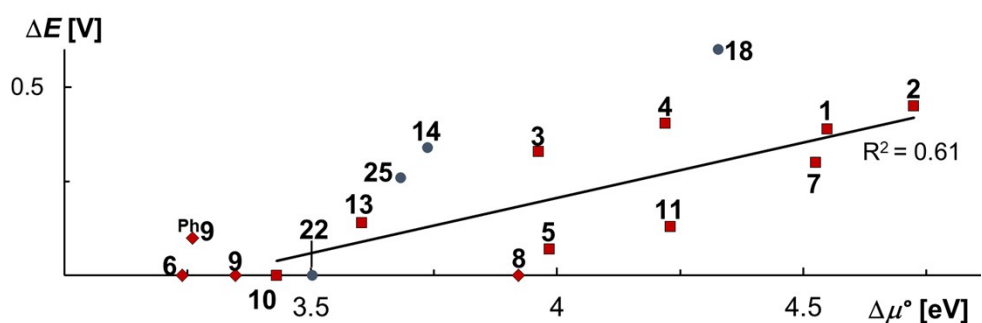

**Figure S23.** The separation of the halfwave potentials of the homodimer ( $\Delta E$ ) obtained by experiments does not correlate linearly with the difference of the calculated chemical potentials in the gas phase ( $\Delta\mu^\circ = \mu^\circ_1 - \mu^\circ_2$ ), if both  $\mu^\circ_1$  and  $\mu^\circ_2$  are calculated with Eq. 2. Heterodimers are given in blue circles, homodimers are given in red squares and diamonds. Heterodimers and homodimers given in red diamonds are not included in the linear correlation.

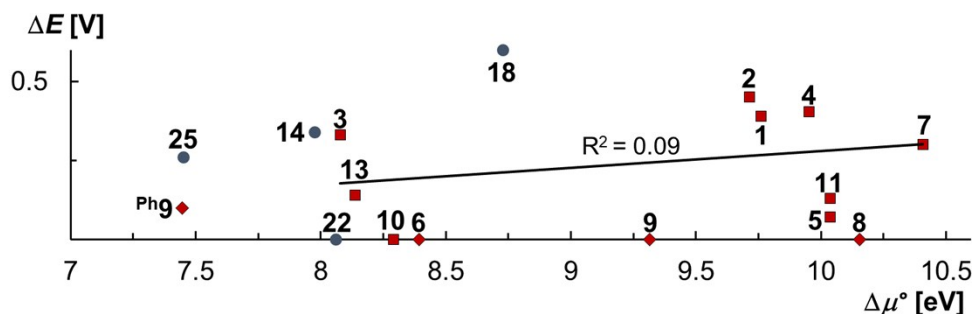

**Figure S24.** The separation of the halfwave potentials of the homodimer ( $\Delta E$ ) obtained by experiments does not correlate linearly with the difference of the calculated chemical potentials in the gas phase ( $\Delta\mu^\circ = \mu^\circ_1 - \mu^\circ_2$ ), if  $\mu^\circ_1$  is calculated with Eq. 1 and  $\mu^\circ_2$  with Eq. 2. Heterodimers are given in blue circles, homodimers are given in red squares and diamonds. Heterodimers and homodimers given in red diamonds are not included in the linear correlation.

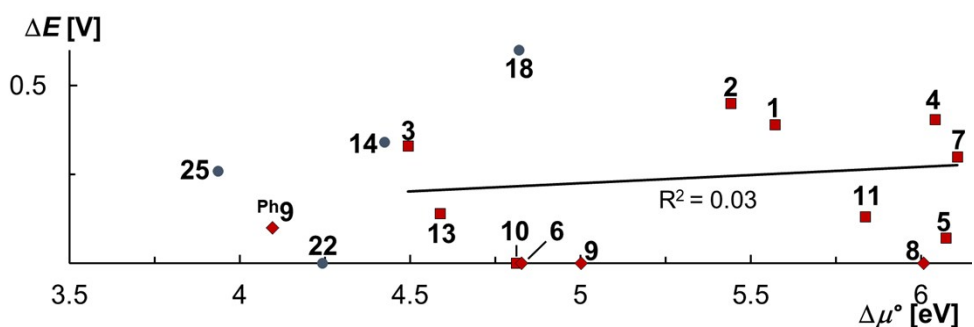

**Figure S25.** The separation of the halfwave potentials of the homodimer ( $\Delta E$ ) obtained by experiments does not correlate linearly with the difference of the calculated chemical potentials in the gas phase ( $\Delta\mu^\circ = \mu^\circ_1 - \mu^\circ_2$ ), if both  $\mu^\circ_1$  and  $\mu^\circ_2$  are calculated with Eq. 1. Heterodimers are given in blue circles, homodimers are given in red squares and diamonds. Heterodimers and homodimers given in red diamonds are not included in the linear correlation.

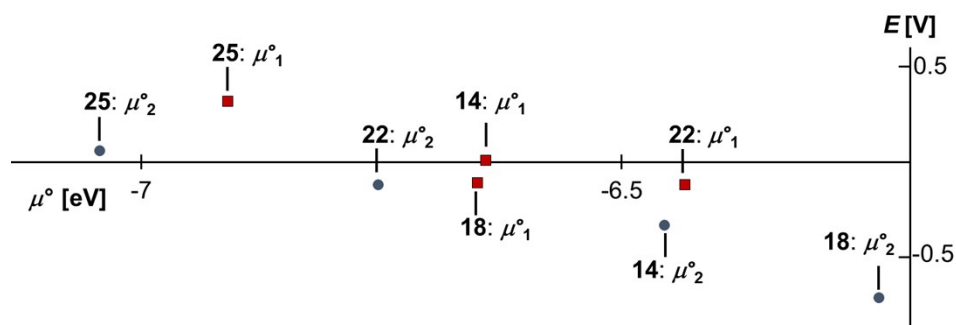

**Figure S26.** The calculated chemical potentials of the heterodimers are plotted against their respective experimental halfwave potential ( $\Delta E_{1,2}$  vs.  $\mu^\circ_1$ ;  $\Delta E_{2,3}$  vs.  $\mu^\circ_2$ ). The experimentally determined potentials are referenced vs. SCE.

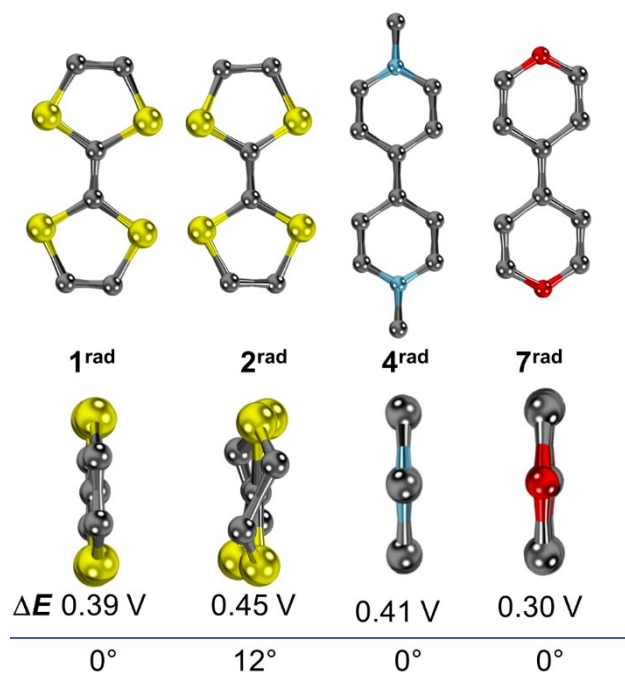

**Figure S27.** Geometry optimized structures (B3LYP-D3BJ/def2-SVP) of radical cations **1<sup>rad</sup>**, **2<sup>rad</sup>**, **4<sup>rad</sup>**, and **7<sup>rad</sup>**. Unsubstituted homodimer radicals and their corresponding  $\Delta E$  from literature.<sup>3, 7, 15, 18</sup> Homodimeric radicals are stable if the dihedral angle (bottom) is small enough.



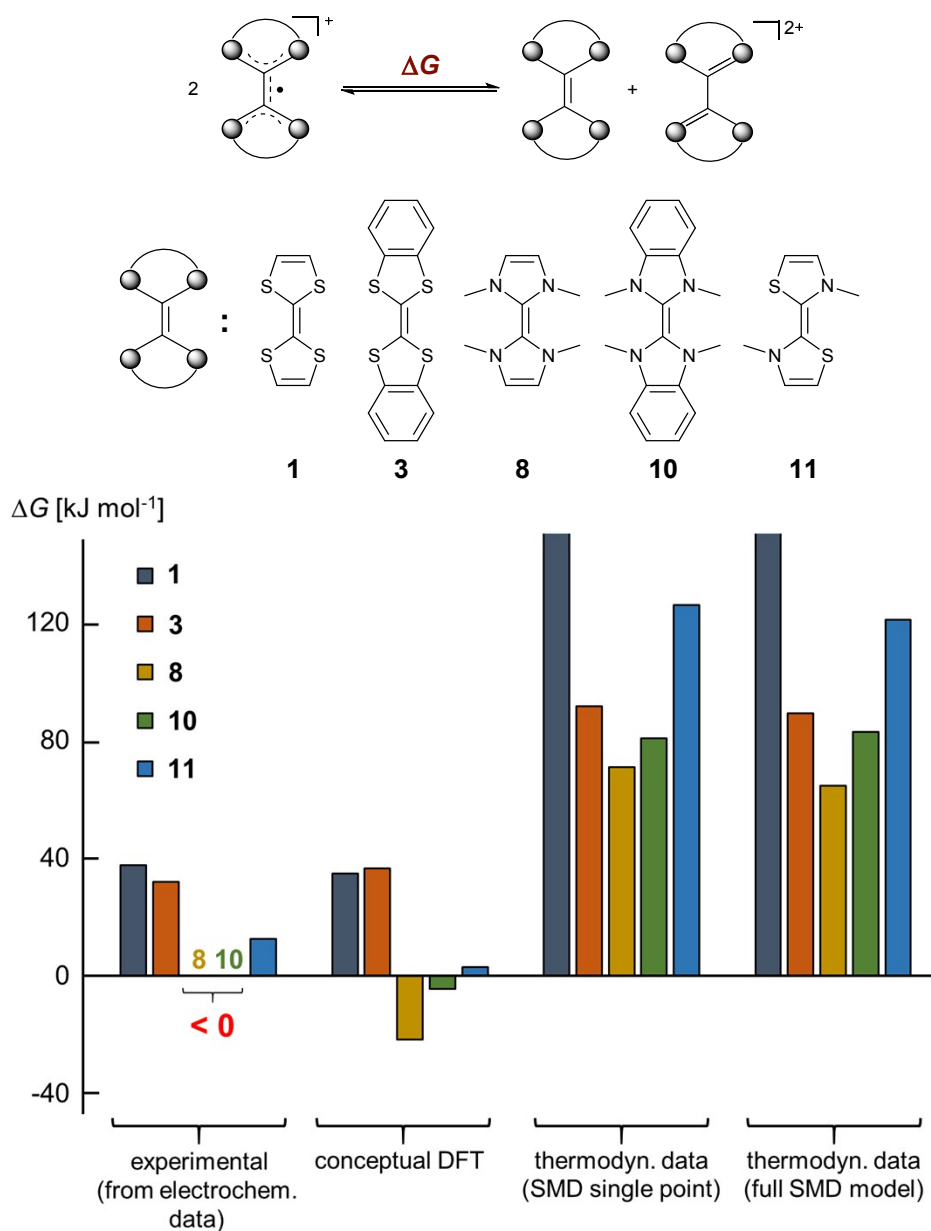

**Figure S28.** Results obtained from conceptual DFT are much better in agreement with the experiment than directly modelling  $\Delta G$  of the disproportionation reaction using implicit solvation models (B3LYP-D3BJ(SMD=THF)/def2-TZVPP//B3LYP-D3BJ/def2-SVP or B3LYP-D3BJ(SMD=THF)/def2-TZVPP//B3LYP-D3BJ(SMD=THF)/def2-SVP). The experimental Gibbs free energy was obtained from electrochemical data ( $\Delta G = -\Delta E z F$ ;  $\Delta E$  [V]; Separation of potentials  $E_{1,2}$  and  $E_{2,3}$ ;  $z = 1$ ; Number of electrons;  $F = 96485.3399$  C mol<sup>-1</sup>; Faraday constant).

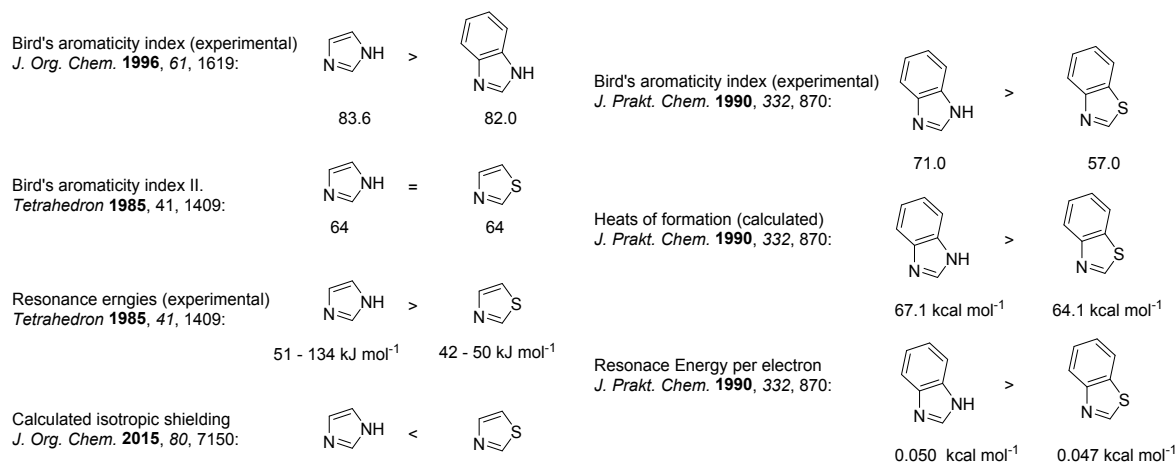

**Figure S29.** Benzimidazole is less aromatic than imidazole and although ambiguous reports exist in the literature, benzimidazole is likely to be (slightly) more aromatic than benzothiazole.

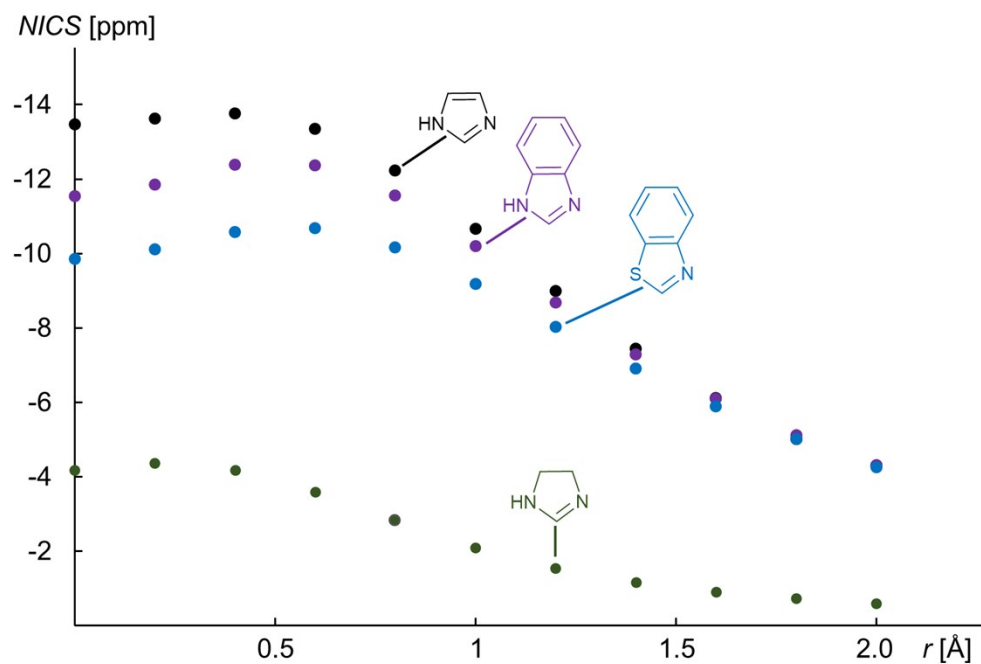

**Figure S30.** The isotropic NICS scan of imidazole, benzimidazole, benzothiazole, and imidazoline. Imidazole is more aromatic than benzimidazole, followed by benzothiazole. Imidazoline is the least aromatic heterocycle in comparison to the other three heterocycles.

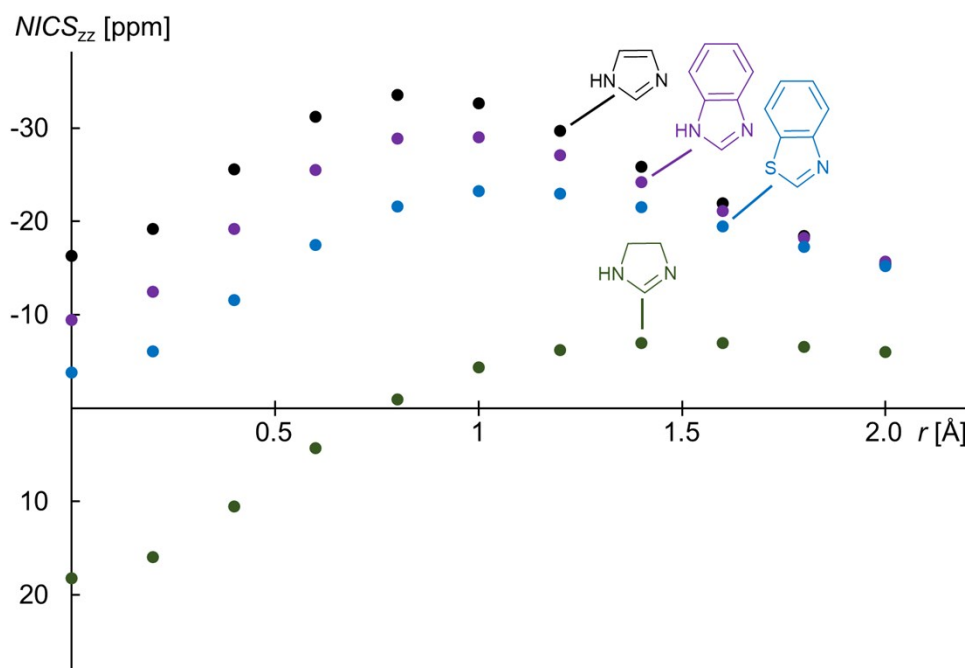

**Figure S31.** The out-of-plane  $NICS$  (i.e.,  $NICS_{zz}$ ) scan of imidazole, benzimidazole, benzothiazole, and imidazoline. Imidazole is more aromatic than benzimidazole, followed by benzothiazole. Imidazoline is the least aromatic heterocycle in comparison to the other three heterocycles.

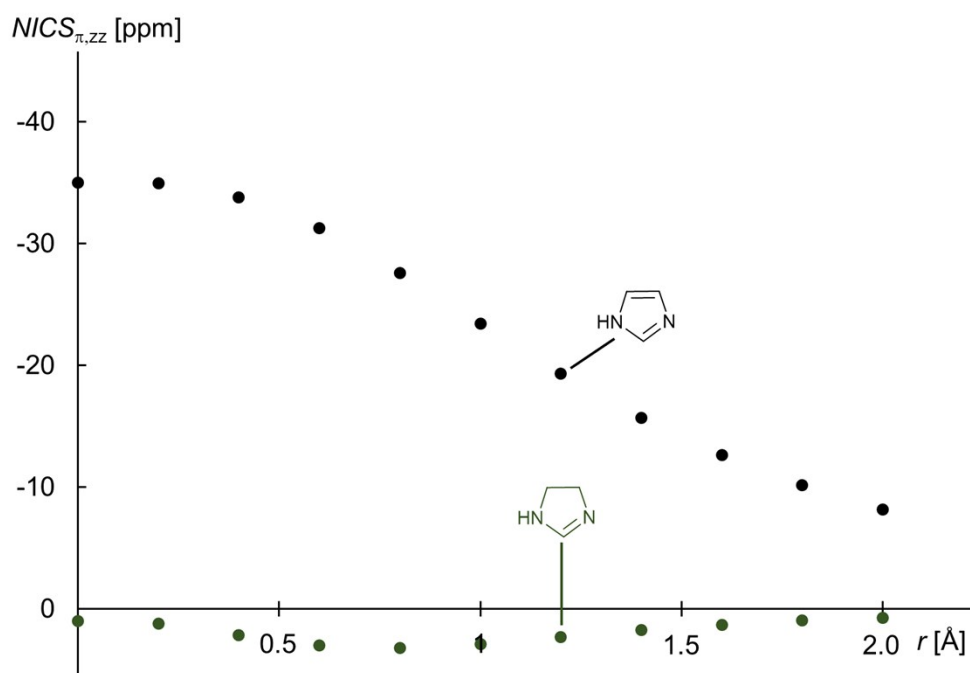

**Figure S32.** Subtracting the “ $\sigma$ -only” contributions<sup>23</sup> from  $NICS_{zz}$ , i.e.  $NICS_{\pi,zz}$ , indicates non-aromatic character of imidazoline.

## Energies

| Denominator                                      | Nimag | $\Delta E$<br>(B3LYP-<br>D3BJ/def2-<br>SVP) | $\Delta G$<br>(B3LYP-<br>D3BJ/def2-<br>SVP) | $\Delta E$<br>(B3LYP-<br>D3BJ/def2-<br>TZVPP//B3LYP-<br>D3BJ/def2-SVP) | $\Delta E$ [biscation<br>vertical<br>energies]<br>(B3LYP-<br>D3BJ/def2-<br>TZVPP//B3LY<br>P-D3BJ/def2-<br>SVP) |
|--------------------------------------------------|-------|---------------------------------------------|---------------------------------------------|------------------------------------------------------------------------|----------------------------------------------------------------------------------------------------------------|
| <b>1</b>                                         | 0     | -1822.789600                                | -1822.741973                                | -1823.606757                                                           |                                                                                                                |
| <b>1</b> <sup>rad</sup>                          | 0     | -1822.565984                                | -1822.518158                                | -1823.38244                                                            |                                                                                                                |
| <b>1</b> <sup>biscat</sup>                       | 0     | -1822.164066                                | -1822.114563                                | -1822.985241                                                           | -1823.374235                                                                                                   |
| <b>2</b>                                         | 0     | -1825.232814                                | -1825.139238                                | -1826.052047                                                           |                                                                                                                |
| <b>2</b> <sup>rad</sup>                          | 0     | -1825.000443                                | -1824.906364                                | -1825.818269                                                           |                                                                                                                |
| <b>2</b> <sup>biscat</sup>                       | 0     | -1824.586739                                | -1824.492087                                | -1825.408132                                                           | -1825.811066                                                                                                   |
| <b>3</b>                                         | 0     | -2129.730226                                | -2129.594652                                | -2130.869751                                                           |                                                                                                                |
| <b>3</b> <sup>rad</sup>                          | 0     | -2129.508300                                | -2129.372303                                | -2130.647117                                                           |                                                                                                                |
| <b>3</b> <sup>biscat</sup>                       | 0     | -2129.134174                                | -2128.996848                                | -2130.276476                                                           | -2130.640498                                                                                                   |
| <b>4</b>                                         | 0     | -574.430192                                 | -574.232851                                 | -575.058077                                                            |                                                                                                                |
| <b>4</b> <sup>rad</sup>                          | 0     | -574.263817                                 | -574.064043                                 | -574.887853                                                            |                                                                                                                |
| <b>4</b> <sup>biscat</sup>                       | 0     | -574.043063                                 | -574.096830                                 | -574.559457                                                            | -574.877796                                                                                                    |
| <b>5</b>                                         | 0     | -574.412471                                 | -574.213940                                 | -575.038863                                                            |                                                                                                                |
| <b>5</b> <sup>rad</sup>                          | 0     | -574.236470                                 | -574.035630                                 | -574.860156                                                            |                                                                                                                |
| <b>5</b> <sup>biscat</sup>                       | 0     | -573.908529                                 | -573.705587                                 | -574.532212                                                            | -574.843101                                                                                                    |
| <b>6</b>                                         | 0     | -842.008724                                 | -841.674691                                 | -842.932149                                                            |                                                                                                                |
| <b>6</b> <sup>rad</sup>                          | 0     | -841.862930                                 | -841.527554                                 | -842.908717                                                            |                                                                                                                |
| <b>6</b> <sup>biscat</sup>                       | 0     | -841.593676                                 | -841.256157                                 | -842.511464                                                            | -842.758788                                                                                                    |
| Et-teth <b>6</b>                                 | 0     | -840.830766                                 | -840.514582                                 | -841.747673                                                            |                                                                                                                |
| Et-teth <b>6</b> <sup>rad</sup>                  | 0     | -840.686911                                 | -840.368975                                 | -841.598708                                                            |                                                                                                                |
| Et-teth <b>6</b> <sup>biscat</sup>               | 0     | -840.402337                                 | -840.080617                                 | -841.314086                                                            | -841.589660                                                                                                    |
| Pr-teth <b>6</b>                                 | 0     | -880.082982                                 | -879.738952                                 | -881.042691                                                            |                                                                                                                |
| Pr-teth <b>6</b> <sup>rad</sup>                  | 0     | -879.942446                                 | -879.596333                                 | -880.896768                                                            |                                                                                                                |
| Pr-teth <b>6</b> <sup>biscat</sup>               | 0     | -879.667654                                 | -879.317786                                 | -880.622109                                                            | -880.882202                                                                                                    |
| <b>7</b>                                         | 0     | -535.588758                                 | -535.466569                                 | -536.185663                                                            |                                                                                                                |
| <b>7</b> <sup>rad</sup>                          | 0     | -535.372319                                 | -535.247917                                 | -535.965438                                                            |                                                                                                                |
| <b>7</b> <sup>biscat</sup>                       | 0     | -534.978539                                 | -534.853787                                 | -535.572019                                                            | -535.952089                                                                                                    |
| <b>8</b>                                         | 0     | -608.838430                                 | -608.620822                                 | -609.508833                                                            |                                                                                                                |
| <b>8</b> <sup>rad</sup>                          | 0     | -608.683224                                 | -608.465752                                 | -609.347164                                                            |                                                                                                                |
| <b>8</b> <sup>biscat</sup>                       | 0     | -608.382694                                 | -608.163009                                 | -609.046287                                                            | -609.324578                                                                                                    |
| Et-teth <b>8</b>                                 | 0     | -606.437181                                 | -606.256073                                 | -607.097234                                                            |                                                                                                                |
| Et-teth <b>8</b> <sup>rad</sup>                  | 0     | -606.279479                                 | -606.098106                                 | -606.932417                                                            |                                                                                                                |
| (isomer 1)<br>Et-teth <b>8</b> <sup>rad</sup>    | 0     | -606.279910                                 | -606.097385                                 | -606.933046                                                            |                                                                                                                |
| (isomer 2)<br>Et-teth <b>8</b> <sup>biscat</sup> | 0     | -605.958791                                 | -605.773045                                 | -606.612236                                                            | -606.922893                                                                                                    |
| (isomer 1)<br>Et-teth <b>8</b> <sup>biscat</sup> | 0     | -605.956945                                 | -605.771248                                 | -606.610479                                                            | -606.922856                                                                                                    |
| (isomer 2)<br>Pr-teth <b>8</b>                   | 0     | -684.984026                                 | -684.747727                                 | -685.728554                                                            |                                                                                                                |
| (isomer 1)<br>Pr-teth <b>8</b> <sup>rad</sup>    | 0     | -684.829957                                 | -684.591822                                 | -685.568174                                                            |                                                                                                                |
| (isomer 2)<br>Pr-teth <b>8</b> <sup>rad</sup>    | 0     | -684.829739                                 | -684.591725                                 | -685.567670                                                            |                                                                                                                |

|                                                |   |              |              |              |              |
|------------------------------------------------|---|--------------|--------------|--------------|--------------|
| Pr-teth <b>8</b> biscat<br>(isomer 1)          | 0 | -684.520476  | -684.278109  | -685.258471  | -685.557100  |
| Pr-teth <b>8</b> biscat<br>(isomer 2)          | 0 | -684.519842  | -684.277599  | -685.257792  | -685.558413  |
| <b>9</b>                                       | 0 | -611.268144  | -611.004402  | -611.942104  |              |
| <b>9</b> <sup>rad</sup>                        | 0 | -611.095983  | -610.830591  | -611.766812  |              |
| <b>9</b> biscat                                | 0 | -610.774444  | -610.509942  | -611.445070  | -611.724676  |
| Ph <b>9</b>                                    | 0 | -1377.328830 | -1376.865068 | -1378.808140 |              |
| Ph <b>9</b> <sup>rad</sup>                     | 0 | -1377.150497 | -1376.685663 | -1378.627366 |              |
| Ph <b>9</b> biscat                             | 0 | -1376.846886 | -1376.379709 | -1378.325102 | -1378.609025 |
| <b>10</b>                                      | 0 | -915.793272  | -915.487344  | -916.784082  |              |
| <b>10</b> <sup>rad</sup>                       | 0 | -915.626563  | -915.318718  | -916.612438  |              |
| <b>10</b> biscat                               | 0 | -915.326268  | -915.016696  | -916.312401  | -916.594534  |
| Et-teth <b>10</b>                              | 0 | -913.396100  | -913.126340  | -914.374964  |              |
| Et-teth <b>10</b> <sup>rad</sup><br>(isomer 1) | 0 | -913.226168  | -912.954601  | -914.201111  |              |
| Et-teth <b>10</b> <sup>rad</sup><br>(isomer 2) | 0 | -913.226219  | -912.955352  | -914.201853  |              |
| Et-teth <b>10</b> biscat<br>(isomer 1)         | 0 | -912.911708  | -912.637841  | -913.887654  | -914.194915  |
| Et-teth <b>10</b> biscat<br>(isomer 2)         | 0 | -912.909990  | -912.636093  | -913.886278  | -914.194707  |
| Pr-teth <b>10</b>                              | 0 | -991.935867  | -991.611909  | -992.998924  |              |
| Pr-teth <b>10</b> <sup>rad</sup><br>(isomer 1) | 0 | -991.767538  | -991.440423  | -992.827109  |              |
| Pr-teth <b>10</b> <sup>rad</sup><br>(isomer 2) | 0 | -991.766666  | -991.438802  | -992.826285  |              |
| Pr-teth <b>10</b> biscat<br>(isomer 1)         | 0 | -991.460568  | -991.129842  | -992.520661  | -992.821455  |
| Pr-teth <b>10</b> biscat<br>(isomer 2)         | 0 | -991.46055   | -991.129651  | -992.520627  |              |
| <b>11</b>                                      | 0 | -1215.815013 | -1215.684344 | -1216.558107 |              |
| <b>11</b> <sup>rad</sup>                       | 0 | -1215.631185 | -1215.498415 | -1216.370870 |              |
| <b>11</b> biscat                               | 0 | -1215.274832 | -1215.140283 | -1216.017428 | -1216.350061 |
| <b>12</b>                                      | 0 | -1218.247043 | -1218.069708 | -1218.994091 |              |
| <b>12</b> <sup>rad</sup>                       | 0 | -1218.049160 | -1217.871070 | -1218.792220 |              |
| <b>12</b> biscat                               | 0 | -1217.684918 | -1217.505533 | -1218.430747 | -1218.773824 |
| <b>13</b>                                      | 0 | -1522.762679 | -1522.541869 | -1522.541760 |              |
| <b>13</b> <sup>rad</sup>                       | 0 | -1522.570101 | -1522.346859 | -1523.631923 |              |
| <b>13</b> biscat                               | 0 | -1522.232273 | -1522.007412 | -1523.295969 | -1523.616215 |
| <b>14</b>                                      | 0 | -1292.380667 | -1291.792235 | -1293.783326 |              |
| <b>14</b> <sup>rad</sup>                       | 0 | -1292.209116 | -1291.617717 | -1293.608015 |              |
| <b>14</b> biscat                               | 0 | -1291.898464 | -1291.306219 | -1293.298806 | -1293.593083 |
| <b>18</b>                                      | 0 | -1138.908530 | -1138.365291 | -1140.151698 |              |
| <b>18</b> <sup>rad</sup>                       | 0 | -1138.741644 | -1138.195562 | -1139.979345 |              |
| <b>18</b> biscat                               | 0 | -1138.428107 | -1137.880082 | -1139.667377 | -1139.965217 |
| <b>22</b>                                      | 0 | -1140.121040 | -1139.554425 | -1141.182343 |              |
| <b>22</b> <sup>rad</sup>                       | 0 | -1139.941321 | -1139.372056 | -1139.372088 |              |
| <b>22</b> biscat                               | 0 | -1139.625391 | -1139.054861 | -1140.867853 | -1141.159557 |
| <b>25</b>                                      | 0 | -1595.879798 | -1595.334262 | -1597.317407 |              |
| <b>25</b> <sup>rad</sup>                       | 0 | -1595.688924 | -1595.141632 | -1597.125676 |              |
| <b>25</b> biscat                               | 0 | -1595.357802 | -1594.808195 | -1596.796837 | -1597.110000 |
| <b>25</b> [(E) isomer]                         | 0 | -1595.874054 | -1595.327809 |              |              |

**Table S3.** Electronic ( $\Delta E$ ) and Gibbs free energies ( $\Delta G$ ). All Energies are given in [Hartree].

## XYZ Coordinates

|                            |          |         |          |                            |          |         |          |
|----------------------------|----------|---------|----------|----------------------------|----------|---------|----------|
| <b>1</b>                   |          |         |          | S                          | -5.93404 | 3.04766 | -2.10995 |
| C                          | -6.63415 | 1.67920 | -1.19825 | H                          | -7.44390 | 1.23990 | -1.64375 |
| C                          | -5.98446 | 1.31447 | -0.08230 | C                          | -4.75934 | 3.51231 | -0.86090 |
| S                          | -6.15988 | 3.18275 | -1.97583 | S                          | -4.59841 | 2.34366 | 0.48101  |
| H                          | -7.43968 | 1.10821 | -1.66188 | H                          | -6.23155 | 0.58242 | 0.62690  |
| C                          | -4.90238 | 3.58210 | -0.77861 | C                          | -4.06176 | 4.66439 | -0.93674 |
| S                          | -4.70648 | 2.36579 | 0.50949  | S                          | -4.43223 | 5.91265 | -2.16176 |
| H                          | -6.18944 | 0.40577 | 0.48572  | C                          | -3.10681 | 7.06106 | -1.63454 |
| C                          | -4.15961 | 4.71029 | -0.84440 | C                          | -2.88787 | 6.87381 | -0.13913 |
| S                          | -4.35507 | 5.92697 | -2.13205 | S                          | -2.72713 | 5.07301 | 0.15847  |
| C                          | -3.09028 | 6.98756 | -1.52874 | H                          | -1.96039 | 7.35388 | 0.20722  |
| C                          | -2.44052 | 6.62216 | -0.41302 | H                          | -2.18673 | 6.84382 | -2.19773 |
| S                          | -2.90147 | 5.10846 | 0.35284  | H                          | -3.73684 | 7.27270 | 0.43687  |
| H                          | -1.64165 | 7.19781 | 0.05633  | H                          | -3.44805 | 8.08022 | -1.87585 |
| H                          | -2.89179 | 7.90135 | -2.09086 | H                          | -7.50218 | 2.47294 | -0.33928 |
|                            |          |         |          | H                          | -5.24965 | 0.42519 | -0.86767 |
| <b>1<sup>rad</sup></b>     |          |         |          | <b>2<sup>rad</sup></b>     |          |         |          |
| C                          | -6.62751 | 1.68854 | -1.20450 | C                          | -6.82764 | 1.79467 | -1.07746 |
| C                          | -5.97438 | 1.32121 | -0.08092 | C                          | -5.74635 | 1.14543 | -0.23030 |
| S                          | -6.15150 | 3.18765 | -1.94400 | S                          | -6.04159 | 3.15552 | -2.03266 |
| H                          | -7.42770 | 1.11918 | -1.68133 | H                          | -7.26024 | 1.09086 | -1.80343 |
| C                          | -4.92157 | 3.56781 | -0.77135 | C                          | -4.93538 | 3.59065 | -0.76583 |
| S                          | -4.72900 | 2.38736 | 0.49517  | S                          | -4.78591 | 2.49465 | 0.57219  |
| H                          | -6.16657 | 0.40976 | 0.48883  | H                          | -6.17147 | 0.52430 | 0.57197  |
| C                          | -4.14891 | 4.73080 | -0.84357 | C                          | -4.20624 | 4.79156 | -0.81969 |
| S                          | -4.34159 | 5.91131 | -2.10994 | S                          | -4.61283 | 6.03106 | -1.96612 |
| C                          | -3.09694 | 6.97792 | -1.53340 | C                          | -3.10383 | 7.02811 | -1.64485 |
| C                          | -2.44379 | 6.61060 | -0.40983 | C                          | -2.77263 | 6.89203 | -0.16859 |
| S                          | -2.91917 | 5.11107 | 0.32919  | S                          | -2.88768 | 5.10731 | 0.26303  |
| H                          | -1.64382 | 7.18024 | 0.06703  | H                          | -1.74801 | 7.22067 | 0.05885  |
| H                          | -2.90442 | 7.88943 | -2.10296 | H                          | -2.29929 | 6.64625 | -2.29155 |
|                            |          |         |          | H                          | -3.47964 | 7.44216 | 0.47061  |
| <b>1<sup>bisecat</sup></b> |          |         |          | H                          | -3.33457 | 8.06714 | -1.92293 |
| C                          | -6.49837 | 1.59509 | -1.28748 | H                          | -7.63156 | 2.23075 | -0.46525 |
| C                          | -6.09173 | 1.41180 | 0.00490  | H                          | -5.04795 | 0.54109 | -0.82940 |
| S                          | -5.87076 | 2.97376 | -2.09460 |                            |          |         |          |
| H                          | -7.17040 | 0.93163 | -1.84270 | <b>2<sup>bisecat</sup></b> |          |         |          |
| C                          | -4.95454 | 3.55522 | -0.77352 | C                          | -6.76930 | 1.71615 | -1.18212 |
| S                          | -5.04216 | 2.60777 | 0.64748  | C                          | -5.80946 | 1.18318 | -0.13346 |
| H                          | -6.39239 | 0.58166 | 0.65351  | S                          | -5.91765 | 3.08322 | -2.09605 |
| C                          | -4.14498 | 4.76205 | -0.85096 | H                          | -7.04396 | 0.94700 | -1.92031 |
| S                          | -4.56094 | 6.09378 | -1.83933 | C                          | -4.99813 | 3.58269 | -0.76123 |
| C                          | -3.20278 | 7.05696 | -1.42453 | S                          | -4.96364 | 2.63470 | 0.64540  |
| C                          | -2.33337 | 6.52226 | -0.51565 | H                          | -6.33238 | 0.63796 | 0.66827  |
| S                          | -2.70145 | 4.94366 | 0.04818  | C                          | -4.22348 | 4.84329 | -0.81903 |
| H                          | -1.42914 | 7.01255 | -0.13800 | S                          | -4.72874 | 6.10915 | -1.82861 |
| H                          | -3.10385 | 8.04468 | -1.88886 | C                          | -3.18334 | 7.10326 | -1.60361 |
|                            |          |         |          | C                          | -2.65302 | 6.83512 | -0.20449 |
| <b>2</b>                   |          |         |          | S                          | -2.83090 | 5.02312 | 0.13341  |
| C                          | -6.83798 | 1.90257 | -1.00692 | H                          | -1.58460 | 7.08727 | -0.11233 |
| C                          | -5.78792 | 1.13201 | -0.21768 | H                          | -2.49649 | 6.78587 | -2.40566 |

|   |          |         |          |   |         |         |          |
|---|----------|---------|----------|---|---------|---------|----------|
| H | -3.21559 | 7.35282 | 0.58974  | C | 5.78940 | 6.04969 | -3.80930 |
| H | -3.45042 | 8.16184 | -1.75089 | H | 5.54584 | 5.87942 | -5.93814 |
| H | -7.68414 | 2.15946 | -0.75474 | H | 6.93534 | 7.14151 | 4.91760  |
| H | -5.00755 | 0.54812 | -0.54571 | H | 5.78482 | 7.14152 | -3.80774 |

**3**

|   |          |         |          |
|---|----------|---------|----------|
| S | 1.50609  | 2.36207 | 0.85758  |
| S | -0.84172 | 3.62411 | 2.19487  |
| C | 1.76830  | 2.97178 | 2.49918  |
| C | 0.66002  | 3.56959 | 3.12939  |
| C | 0.77165  | 4.05673 | 4.43422  |
| C | 1.99260  | 3.94557 | 5.10656  |
| C | 3.09373  | 3.35262 | 4.48110  |
| C | 2.98600  | 2.86256 | 3.17577  |
| C | -0.08141 | 3.13509 | 0.66669  |
| H | -0.08761 | 4.52628 | 4.91871  |
| H | 2.08363  | 4.33631 | 6.12265  |
| H | 4.04670  | 3.27601 | 5.00922  |
| H | 3.84634  | 2.40466 | 2.68275  |
| C | -0.66831 | 3.31320 | -0.53812 |
| S | -2.26047 | 4.07393 | -0.73960 |
| S | 0.08422  | 2.79126 | -2.05886 |
| C | -2.03064 | 4.43207 | -2.45963 |
| C | -0.91813 | 3.83163 | -3.07993 |
| C | -2.89824 | 5.23510 | -3.20525 |
| C | -0.66664 | 4.04326 | -4.43746 |
| C | -2.64544 | 5.44198 | -4.56501 |
| H | -3.76098 | 5.70206 | -2.72487 |
| C | -1.53338 | 4.85360 | -5.17682 |
| H | 0.20300  | 3.58184 | -4.91112 |
| H | -3.32116 | 6.07197 | -5.14749 |
| H | -1.32816 | 5.03470 | -6.23454 |

**3<sup>rad</sup>**

|   |         |         |          |
|---|---------|---------|----------|
| C | 6.45151 | 4.63292 | 1.24738  |
| S | 6.57883 | 3.15783 | 2.15898  |
| C | 6.78493 | 3.92821 | 3.72244  |
| C | 6.93075 | 3.21634 | 4.91910  |
| C | 7.06663 | 3.93038 | 6.10736  |
| C | 6.26400 | 4.63292 | -0.13703 |
| S | 6.13683 | 3.15784 | -1.04868 |
| C | 5.93307 | 3.92822 | -2.61243 |
| C | 5.78932 | 3.21632 | -3.80936 |
| C | 5.65546 | 3.93038 | -4.99783 |
| H | 6.93551 | 2.12451 | 4.91771  |
| H | 7.17810 | 3.38671 | 7.04752  |
| H | 5.78469 | 2.12450 | -3.80786 |
| H | 5.54578 | 3.38671 | -5.93820 |
| S | 6.57875 | 6.10805 | 2.15893  |
| C | 6.78489 | 5.33774 | 3.72241  |
| C | 7.06658 | 5.33570 | 6.10734  |
| S | 6.13697 | 6.10803 | -1.04863 |
| C | 5.93312 | 5.33774 | -2.61240 |
| C | 5.65550 | 5.33570 | -4.99780 |
| C | 6.93065 | 6.04968 | 4.91904  |
| H | 7.17801 | 5.87942 | 7.04747  |

**3<sup>biscat</sup>**

|   |          |          |          |
|---|----------|----------|----------|
| C | -5.80267 | 1.27941  | -1.23457 |
| C | -6.61428 | 1.72209  | -0.15040 |
| S | -4.62611 | 2.42930  | -1.79360 |
| C | -4.99407 | 3.65357  | -0.66164 |
| S | -6.24772 | 3.31357  | 0.44801  |
| C | -4.26539 | 4.90364  | -0.63288 |
| S | -4.96884 | 6.34173  | -0.03634 |
| C | -3.57011 | 7.35044  | -0.25498 |
| C | -2.44241 | 6.70459  | -0.84026 |
| S | -2.64921 | 5.01162  | -1.17685 |
| C | -7.61707 | 0.89622  | 0.37923  |
| H | -8.23989 | 1.22690  | 1.21272  |
| C | -5.98711 | 0.00908  | -1.80063 |
| C | -7.79171 | -0.35952 | -0.19134 |
| H | -5.36682 | -0.33554 | -2.63100 |
| H | -8.56471 | -1.02293 | 0.20279  |
| C | -6.98736 | -0.79693 | -1.26916 |
| H | -7.15495 | -1.78928 | -1.69434 |
| C | -1.25524 | 7.41192  | -1.08417 |
| H | -0.38866 | 6.92272  | -1.53369 |
| C | -1.21743 | 8.75715  | -0.73435 |
| C | -3.51960 | 8.70919  | 0.09088  |
| H | -0.30563 | 9.33122  | -0.91449 |
| H | -4.37900 | 9.21145  | 0.54033  |
| C | -2.33516 | 9.39627  | -0.15091 |
| H | -2.26760 | 10.45250 | 0.11983  |

**4**

|   |          |         |          |
|---|----------|---------|----------|
| N | -4.06998 | 6.25679 | -5.23731 |
| C | -5.21860 | 5.95117 | -4.51517 |
| C | -2.96464 | 6.69306 | -4.51350 |
| H | -6.08111 | 5.65540 | -5.11588 |
| H | -2.09715 | 6.97906 | -5.11201 |
| C | -5.26265 | 5.99314 | -3.16176 |
| C | -2.95511 | 6.75041 | -3.15981 |
| H | -6.20127 | 5.70820 | -2.68694 |
| H | -2.03546 | 7.08937 | -2.68298 |
| C | -4.11327 | 6.38281 | -2.35001 |
| C | -4.12201 | 6.40470 | -0.96332 |
| C | -5.28042 | 6.03764 | -0.15360 |
| C | -2.97288 | 6.79495 | -0.15149 |
| H | -6.19927 | 5.69641 | -0.63037 |
| H | -2.03344 | 7.07761 | -0.62606 |
| C | -5.27207 | 6.09822 | 1.19994  |
| C | -3.01813 | 6.84014 | 1.20178  |
| H | -6.13977 | 5.81283 | 1.79842  |
| H | -2.15591 | 7.13654 | 1.80259  |
| N | -4.16768 | 6.53713 | 1.92361  |
| C | -4.13179 | 6.43617 | -6.66890 |
| H | -3.13049 | 6.30066 | -7.10555 |

|   |          |         |          |
|---|----------|---------|----------|
| H | -4.79756 | 5.68296 | -7.11667 |
| H | -4.50556 | 7.43865 | -6.96207 |
| C | -4.10718 | 6.36187 | 3.35577  |
| H | -5.10946 | 6.49564 | 3.79063  |
| H | -3.73098 | 5.36126 | 3.65215  |
| H | -3.44420 | 7.11819 | 3.80248  |

**4<sup>rad</sup>**

|   |          |          |         |
|---|----------|----------|---------|
| C | 7.87283  | -0.96625 | 2.57725 |
| H | 7.27525  | -1.75433 | 2.11748 |
| C | 9.23832  | -0.94591 | 2.49834 |
| H | 9.71568  | -1.75343 | 1.94606 |
| C | 10.00956 | 0.08671  | 3.12639 |
| C | 5.72553  | -0.11604 | 3.41569 |
| N | 7.17471  | 0.00516  | 3.24720 |
| C | 7.86811  | 1.03417  | 3.82847 |
| H | 7.26742  | 1.79362  | 4.33022 |
| C | 9.23455  | 1.09945  | 3.78081 |
| H | 9.70841  | 1.95170  | 4.26522 |
| H | 5.30269  | 0.86322  | 3.67358 |
| H | 5.48977  | -0.83007 | 4.22038 |
| H | 5.26825  | -0.46829 | 2.48092 |
| C | 13.57848 | -0.96620 | 2.57683 |
| H | 14.17601 | -1.75429 | 2.11700 |
| C | 12.21299 | -0.94588 | 2.49811 |
| H | 11.73560 | -1.75340 | 1.94587 |
| C | 11.44180 | 0.08670  | 3.12631 |
| C | 15.72591 | -0.11593 | 3.41493 |
| H | 15.96188 | -0.82988 | 4.21963 |
| H | 16.14876 | 0.86337  | 3.67266 |
| H | 16.18301 | -0.46823 | 2.48009 |
| N | 14.27670 | 0.00522  | 3.24669 |
| C | 13.58334 | 1.03417  | 3.82814 |
| H | 14.18408 | 1.79364  | 4.32981 |
| C | 12.21689 | 1.09942  | 3.78069 |
| H | 11.74308 | 1.95159  | 4.26526 |

**4<sup>biscat</sup>**

|   |          |          |          |
|---|----------|----------|----------|
| N | -0.03870 | -0.02512 | -5.68325 |
| C | -1.14846 | 0.34239  | -5.00612 |
| C | 1.08222  | -0.38868 | -5.01669 |
| H | -2.01668 | 0.63082  | -5.60086 |
| H | 1.94063  | -0.68150 | -5.62456 |
| C | -1.16776 | 0.35286  | -3.61839 |
| C | 1.12085  | -0.38850 | -3.63211 |
| H | -2.08178 | 0.67644  | -3.11845 |
| H | 2.04073  | -0.70887 | -3.14092 |
| C | -0.01957 | -0.01443 | -2.89781 |
| C | -0.00891 | -0.00745 | -1.41124 |
| C | -1.13993 | -0.40248 | -0.67349 |
| C | 1.12991  | 0.39442  | -0.69412 |
| H | -2.05160 | -0.74978 | -1.16170 |
| H | 2.03586  | 0.73553  | -1.19710 |
| C | -1.10156 | -0.38898 | 0.71110  |
| C | 1.11057  | 0.39637  | 0.69357  |
| H | -1.95266 | -0.69725 | 1.32157  |

|   |          |          |          |
|---|----------|----------|----------|
| H | 1.97129  | 0.71151  | 1.28567  |
| N | 0.00992  | 0.00812  | 1.37419  |
| C | -0.02725 | -0.02959 | -7.16776 |
| H | 0.70820  | 0.70580  | -7.52222 |
| H | 0.24396  | -1.03360 | -7.52081 |
| H | -1.02371 | 0.23539  | -7.53701 |
| C | -0.00118 | 0.01864  | 2.85871  |
| H | 0.99018  | 0.30636  | 3.22476  |
| H | -0.75051 | 0.74340  | 3.20593  |
| H | -0.25297 | -0.98663 | 3.22228  |

**5**

|   |         |          |          |
|---|---------|----------|----------|
| C | 5.51509 | 1.77375  | 14.68949 |
| C | 5.22310 | 2.94105  | 15.49411 |
| N | 5.95233 | 0.62180  | 5.42345  |
| C | 5.05820 | 2.85607  | 6.84220  |
| C | 5.68218 | 0.53309  | 6.78347  |
| C | 5.21030 | 1.57850  | 7.50297  |
| H | 5.07338 | 3.89853  | 4.99538  |
| H | 4.79753 | 3.74294  | 17.42357 |
| H | 5.90353 | -0.43844 | 17.23539 |
| H | 4.96730 | 1.45067  | 18.55856 |
| C | 5.37581 | 1.74251  | 13.30326 |
| N | 5.31474 | 0.51260  | 12.57398 |
| C | 5.32323 | 2.94278  | 12.49412 |
| C | 5.50681 | 0.50860  | 11.20167 |
| C | 5.44514 | 2.91010  | 11.13997 |
| C | 5.60243 | 1.64181  | 10.46611 |
| H | 5.23237 | 3.90281  | 13.00040 |
| H | 5.54991 | -0.48652 | 10.74999 |
| H | 5.43474 | 3.83706  | 10.56285 |
| H | 5.78442 | 1.58245  | 9.39268  |
| C | 4.51772 | -0.58235 | 13.11217 |
| H | 3.43726 | -0.35681 | 13.04074 |
| H | 4.72521 | -1.49513 | 12.53447 |
| H | 4.75972 | -0.76124 | 14.16767 |
| C | 7.14508 | -0.06648 | 14.94583 |
| H | 7.33056 | -0.94860 | 15.57561 |
| H | 7.02659 | -0.39449 | 13.90274 |
| H | 8.02934 | 0.59500  | 15.00086 |

**5<sup>rad</sup>**

|   |         |          |          |
|---|---------|----------|----------|
| C | 5.45108 | 1.70150  | 14.76775 |
| C | 5.98512 | 0.59283  | 15.46689 |
| N | 5.04166 | 2.80523  | 15.52138 |
| C | 6.17794 | 0.62123  | 16.83231 |
| C | 5.26102 | 2.84123  | 16.87541 |
| C | 5.81929 | 1.79112  | 17.55282 |
| H | 6.32715 | -0.26503 | 14.88890 |
| H | 6.63645 | -0.22684 | 17.34389 |
| H | 4.94115 | 3.75418  | 17.37943 |
| H | 5.97952 | 1.87091  | 18.62831 |
| C | 5.43469 | 1.76349  | 13.32348 |
| N | 4.98265 | 0.66736  | 12.58273 |
| C | 5.97716 | 2.85833  | 12.60928 |
| C | 5.17200 | 0.62239  | 11.22443 |



|   |         |          |          |
|---|---------|----------|----------|
| C | 6.13868 | 2.82190  | 11.23993 |
| C | 5.73907 | 1.65770  | 10.53166 |
| H | 6.35012 | 3.71051  | 13.17639 |
| H | 4.82037 | -0.28423 | 10.73023 |
| H | 6.60296 | 3.65885  | 10.71544 |
| H | 5.87372 | 1.57103  | 9.45318  |
| C | 4.19273 | -0.40152 | 13.20307 |
| H | 3.60614 | 0.01593  | 14.03194 |
| H | 3.50684 | -0.81739 | 12.45440 |
| H | 4.82576 | -1.21287 | 13.59135 |
| C | 4.27167 | 3.89944  | 14.92069 |
| H | 3.61021 | 4.32948  | 15.68327 |
| H | 4.92126 | 4.69518  | 14.52719 |
| H | 3.66002 | 3.50425  | 14.09923 |

**5<sup>biscat</sup>**

|   |         |          |          |
|---|---------|----------|----------|
| C | 5.65521 | 1.69775  | 14.79352 |
| C | 6.47568 | 0.80132  | 15.46832 |
| N | 4.89735 | 2.59263  | 15.50164 |
| C | 6.52486 | 0.80797  | 16.86975 |
| C | 4.93777 | 2.60885  | 16.85482 |
| C | 5.74289 | 1.72761  | 17.56739 |
| H | 7.08822 | 0.10387  | 14.89324 |
| H | 7.17165 | 0.10609  | 17.40272 |
| H | 4.30793 | 3.34915  | 17.35210 |
| H | 5.74909 | 1.77703  | 18.65863 |
| C | 5.64162 | 1.75094  | 13.29704 |
| N | 4.84104 | 0.88352  | 12.60191 |
| C | 6.47563 | 2.62395  | 12.60836 |
| C | 4.85042 | 0.87461  | 11.24802 |
| C | 6.49308 | 2.62440  | 11.20621 |
| C | 5.66576 | 1.73517  | 10.52176 |
| H | 7.12206 | 3.29908  | 13.17293 |
| H | 4.18707 | 0.15728  | 10.76088 |
| H | 7.14983 | 3.30868  | 10.66263 |
| H | 5.64388 | 1.69393  | 9.43036  |
| C | 3.96252 | -0.07394 | 13.32052 |
| H | 3.32184 | 0.46786  | 14.02811 |
| H | 3.33162 | -0.59393 | 12.59097 |
| H | 4.57624 | -0.80798 | 13.85903 |
| C | 4.03481 | 3.57476  | 14.79759 |
| H | 3.41945 | 4.10153  | 15.53559 |
| H | 4.66056 | 4.30070  | 14.26151 |
| H | 3.37835 | 3.05333  | 14.08941 |

**6**

|   |          |          |         |
|---|----------|----------|---------|
| N | -0.03241 | 11.56805 | 4.21084 |
| N | -0.98328 | 11.24916 | 1.48064 |
| N | 1.18193  | 8.13276  | 6.34810 |
| N | -2.87393 | 7.63271  | 0.37874 |
| C | -1.04831 | 12.61291 | 4.17020 |
| C | 0.22628  | 12.02652 | 1.23580 |
| C | 0.89252  | 11.63336 | 5.23643 |
| H | 1.21919  | 12.64408 | 5.50308 |
| C | 1.36737  | 10.54187 | 5.88136 |
| H | 2.16210  | 10.65368 | 6.61738 |

|   |          |          |          |
|---|----------|----------|----------|
| C | 0.79249  | 9.23578  | 5.57851  |
| C | -0.07583 | 9.15014  | 4.52222  |
| H | -0.55706 | 8.20533  | 4.28782  |
| C | -0.35807 | 10.28428 | 3.65937  |
| C | -0.90165 | 10.14642 | 2.39381  |
| C | -1.41902 | 8.88529  | 1.89154  |
| H | -1.12724 | 7.97886  | 2.41356  |
| C | -2.27253 | 8.82098  | 0.82167  |
| C | -2.59653 | 10.06761 | 0.13621  |
| H | -3.37367 | 10.10676 | -0.62619 |
| C | -1.91186 | 11.19065 | 0.45587  |
| H | -2.05697 | 12.12656 | -0.09327 |
| C | 1.23796  | 8.26738  | 7.79202  |
| H | 1.58502  | 9.26660  | 8.08277  |
| H | 1.93942  | 7.53019  | 8.21428  |
| H | 0.24702  | 8.10113  | 8.26834  |
| C | 0.76061  | 6.82103  | 5.91663  |
| H | -0.32538 | 6.63469  | 6.07071  |
| H | 1.31366  | 6.05907  | 6.48709  |
| H | 0.98144  | 6.68232  | 4.84769  |
| C | -2.67102 | 6.44938  | 1.18107  |
| H | -1.62382 | 6.07482  | 1.15260  |
| H | -3.32292 | 5.64292  | 0.81289  |
| H | -2.92980 | 6.65234  | 2.23143  |
| C | -2.87239 | 7.36002  | -1.04854 |
| H | -3.12130 | 8.26057  | -1.62367 |
| H | -3.62420 | 6.59008  | -1.28306 |
| H | -1.88665 | 6.99152  | -1.40884 |
| H | -1.40860 | 12.77056 | 3.14472  |
| H | -0.61782 | 13.55165 | 4.55111  |
| H | -1.91906 | 12.34518 | 4.79671  |
| H | -0.01517 | 12.87531 | 0.57855  |
| H | 1.00181  | 11.41102 | 0.74359  |
| H | 0.64537  | 12.40914 | 2.17636  |

**6<sup>rad</sup>**

|   |          |          |          |
|---|----------|----------|----------|
| N | -0.52121 | 10.97022 | 3.92166  |
| N | -0.54260 | 8.30989  | 1.43090  |
| N | 1.19692  | 8.18445  | 6.54691  |
| N | -4.34282 | 9.85192  | 0.53738  |
| C | -0.77907 | 12.03450 | 2.94984  |
| C | 0.84743  | 7.87920  | 1.57414  |
| C | -0.10220 | 11.32675 | 5.17340  |
| H | -0.21914 | 12.38226 | 5.42494  |
| C | 0.45242  | 10.45550 | 6.05972  |
| H | 0.75776  | 10.83334 | 7.03187  |
| C | 0.62379  | 9.07149  | 5.68807  |
| C | 0.13243  | 8.69876  | 4.42740  |
| H | 0.11583  | 7.65137  | 4.14264  |
| C | -0.46354 | 9.61717  | 3.53432  |
| C | -1.13225 | 9.22544  | 2.31857  |
| C | -2.42295 | 9.71220  | 2.00811  |
| H | -2.90401 | 10.33089 | 2.75953  |
| C | -3.10579 | 9.37170  | 0.83191  |
| C | -2.44201 | 8.43867  | -0.04460 |
| H | -2.89757 | 8.08775  | -0.96686 |

|   |          |          |          |
|---|----------|----------|----------|
| C | -1.22009 | 7.94479  | 0.30200  |
| H | -0.70518 | 7.22928  | -0.34065 |
| C | 1.68773  | 8.61986  | 7.84936  |
| H | 2.45199  | 9.40921  | 7.75352  |
| H | 2.15119  | 7.76904  | 8.36194  |
| H | 0.87469  | 9.00055  | 8.49050  |
| C | 1.33393  | 6.79214  | 6.15521  |
| H | 0.35091  | 6.30970  | 6.01056  |
| H | 1.87100  | 6.24068  | 6.93497  |
| H | 1.90487  | 6.69321  | 5.21505  |
| C | -5.03550 | 10.68880 | 1.50134  |
| H | -5.24645 | 10.13866 | 2.43549  |
| H | -5.98851 | 11.02705 | 1.07825  |
| H | -4.44489 | 11.58516 | 1.75932  |
| C | -4.98715 | 9.52446  | -0.72836 |
| H | -4.34400 | 9.78814  | -1.58366 |
| H | -5.91435 | 10.10217 | -0.81775 |
| H | -5.24474 | 8.45367  | -0.80355 |
| H | -0.36618 | 11.74344 | 1.97432  |
| H | -0.27898 | 12.95143 | 3.28597  |
| H | -1.85131 | 12.24227 | 2.81752  |
| H | 1.21463  | 7.52963  | 0.60114  |
| H | 0.96193  | 7.06276  | 2.30205  |
| H | 1.46391  | 8.72545  | 1.90794  |

**6**biscat

|   |          |          |          |
|---|----------|----------|----------|
| N | -1.01289 | 11.10144 | 4.49750  |
| N | -0.15731 | 10.57721 | 1.41185  |
| N | 1.62126  | 8.43280  | 6.33355  |
| N | -3.21533 | 7.97375  | 0.26833  |
| C | -1.95048 | 12.05398 | 3.87630  |
| C | 0.99316  | 11.42031 | 1.78447  |
| C | -0.64720 | 11.26207 | 5.80373  |
| H | -1.09172 | 12.11305 | 6.32228  |
| C | 0.21882  | 10.41657 | 6.44330  |
| H | 0.46031  | 10.62931 | 7.48299  |
| C | 0.78485  | 9.29602  | 5.75294  |
| C | 0.38987  | 9.16311  | 4.37814  |
| H | 0.77268  | 8.35293  | 3.76205  |
| C | -0.47820 | 10.05174 | 3.79234  |
| C | -0.86565 | 9.87874  | 2.35852  |
| C | -1.87911 | 9.01893  | 2.00855  |
| H | -2.39692 | 8.49667  | 2.81035  |
| C | -2.24872 | 8.81969  | 0.63350  |
| C | -1.50579 | 9.59502  | -0.31425 |
| H | -1.71197 | 9.54024  | -1.38099 |
| C | -0.49932 | 10.42533 | 0.09874  |
| H | 0.08390  | 11.00516 | -0.61826 |
| C | 1.99418  | 8.58813  | 7.74593  |
| H | 2.57957  | 9.50824  | 7.90456  |
| H | 2.60778  | 7.73367  | 8.04933  |
| H | 1.09929  | 8.61168  | 8.38589  |
| C | 2.22024  | 7.34072  | 5.56046  |
| H | 1.44580  | 6.68972  | 5.12545  |
| H | 2.84103  | 6.72885  | 6.22328  |
| H | 2.86057  | 7.73379  | 4.75408  |

|   |          |          |          |
|---|----------|----------|----------|
| C | -3.95500 | 7.19966  | 1.26994  |
| H | -3.27693 | 6.56507  | 1.86218  |
| H | -4.67038 | 6.54682  | 0.75919  |
| H | -4.51822 | 7.86128  | 1.94785  |
| C | -3.56424 | 7.81341  | -1.14967 |
| H | -3.89381 | 8.76944  | -1.58549 |
| H | -4.38673 | 7.09662  | -1.23803 |
| H | -2.70777 | 7.42760  | -1.72451 |
| H | -2.71731 | 11.51248 | 3.30943  |
| H | -1.41663 | 12.74166 | 3.20408  |
| H | -2.43858 | 12.63994 | 4.66342  |
| H | 1.41156  | 11.87417 | 0.87877  |
| H | 1.76625  | 10.81030 | 2.27068  |
| H | 0.68276  | 12.22333 | 2.46538  |

**Et-teth6**

|   |          |          |          |
|---|----------|----------|----------|
| N | 0.28794  | 11.40607 | 4.04185  |
| N | -1.08068 | 11.17059 | 1.59116  |
| N | 1.20738  | 8.05449  | 6.43221  |
| N | -2.84005 | 7.55662  | 0.31937  |
| C | -0.19988 | 12.58217 | 3.36073  |
| H | 0.46826  | 13.42937 | 3.57776  |
| H | -1.21662 | 12.85306 | 3.70671  |
| C | -0.24630 | 12.31617 | 1.85176  |
| H | -0.65110 | 13.19096 | 1.32115  |
| H | 0.78633  | 12.14198 | 1.49008  |
| C | 1.13179  | 11.50037 | 5.11635  |
| H | 1.52679  | 12.50164 | 5.31141  |
| C | 1.47186  | 10.44087 | 5.89162  |
| H | 2.20158  | 10.57132 | 6.68820  |
| C | 0.87877  | 9.13634  | 5.60381  |
| C | 0.06334  | 9.02654  | 4.50917  |
| H | -0.42815 | 8.08390  | 4.28697  |
| C | -0.20229 | 10.13288 | 3.60934  |
| C | -0.88756 | 10.01982 | 2.41785  |
| C | -1.42884 | 8.78135  | 1.89166  |
| H | -1.13974 | 7.86504  | 2.39810  |
| C | -2.25527 | 8.73893  | 0.80026  |
| C | -2.57522 | 9.99813  | 0.12925  |
| H | -3.31074 | 10.04409 | -0.67170 |
| C | -1.95942 | 11.13435 | 0.54080  |
| H | -2.13881 | 12.09533 | 0.04973  |
| C | 1.15422  | 8.23969  | 7.87059  |
| H | 1.80843  | 7.50883  | 8.37222  |
| H | 0.12652  | 8.10359  | 8.27346  |
| H | 1.49320  | 9.24441  | 8.15206  |
| C | 0.79350  | 6.73437  | 6.01892  |
| H | -0.30201 | 6.56486  | 6.11746  |
| H | 1.30290  | 5.98422  | 6.64323  |
| H | 1.07227  | 6.55895  | 4.96924  |
| C | -2.65183 | 6.36005  | 1.10520  |
| H | -1.60105 | 5.99410  | 1.10064  |
| H | -3.28640 | 5.55592  | 0.70338  |
| H | -2.94212 | 6.54159  | 2.15114  |
| C | -2.79353 | 7.30935  | -1.11150 |
| H | -3.02073 | 8.22118  | -1.67772 |

|   |          |         |          |
|---|----------|---------|----------|
| H | -3.53938 | 6.54610 | -1.38374 |
| H | -1.79738 | 6.94401 | -1.44590 |

Et-teth6rad

|   |          |          |          |
|---|----------|----------|----------|
| N | 0.20838  | 11.37211 | 4.07429  |
| N | -0.90585 | 11.08444 | 1.52094  |
| N | 0.97375  | 8.10036  | 6.55334  |
| N | -2.68692 | 7.52752  | 0.25549  |
| C | -0.20052 | 12.54991 | 3.31574  |
| H | 0.45679  | 13.38871 | 3.58206  |
| H | -1.23724 | 12.82838 | 3.57634  |
| C | -0.09980 | 12.25544 | 1.83208  |
| H | -0.46840 | 13.10952 | 1.24930  |
| H | 0.95220  | 12.06901 | 1.55043  |
| C | 0.75988  | 11.53537 | 5.31039  |
| H | 0.99404  | 12.56507 | 5.58842  |
| C | 1.01559  | 10.49991 | 6.15443  |
| H | 1.48577  | 10.71157 | 7.11108  |
| C | 0.72038  | 9.15095  | 5.72900  |
| C | 0.18821  | 8.99112  | 4.44296  |
| H | -0.02682 | 7.99579  | 4.06901  |
| C | -0.12040 | 10.09147 | 3.60239  |
| C | -0.78671 | 9.95758  | 2.34647  |
| C | -1.36771 | 8.74918  | 1.88344  |
| H | -1.25939 | 7.86732  | 2.50489  |
| C | -2.11719 | 8.68039  | 0.70010  |
| C | -2.27276 | 9.90605  | -0.05041 |
| H | -2.85414 | 9.95184  | -0.96685 |
| C | -1.65007 | 11.03662 | 0.38139  |
| H | -1.71164 | 11.97075 | -0.17996 |
| C | 1.31796  | 8.31284  | 7.95416  |
| H | 1.16469  | 7.37669  | 8.50530  |
| H | 0.66566  | 9.07161  | 8.41111  |
| H | 2.36854  | 8.62711  | 8.09043  |
| C | 0.88130  | 6.74153  | 6.04505  |
| H | -0.15826 | 6.46000  | 5.79638  |
| H | 1.25400  | 6.04196  | 6.80239  |
| H | 1.49635  | 6.61721  | 5.13840  |
| C | -2.40975 | 6.27345  | 0.93576  |
| H | -1.33630 | 6.01406  | 0.88785  |
| H | -2.97994 | 5.46715  | 0.46109  |
| H | -2.71174 | 6.31546  | 1.99590  |
| C | -3.41347 | 7.49503  | -1.00772 |
| H | -4.22671 | 8.23691  | -1.02501 |
| H | -3.87184 | 6.50685  | -1.13229 |
| H | -2.74996 | 7.67936  | -1.87126 |

Et-teth6biscat

|   |          |          |         |
|---|----------|----------|---------|
| N | -0.11000 | 11.34479 | 4.20920 |
| N | -0.72134 | 10.99261 | 1.48709 |
| N | 1.18515  | 8.09639  | 6.45688 |
| N | -2.73427 | 7.57669  | 0.24768 |
| C | -0.52968 | 12.49701 | 3.39408 |
| H | -0.03482 | 13.39635 | 3.78165 |
| H | -1.62016 | 12.63438 | 3.48422 |
| C | -0.12401 | 12.25764 | 1.95195 |

|   |          |          |          |
|---|----------|----------|----------|
| H | -0.50121 | 13.07086 | 1.31833  |
| H | 0.97277  | 12.21435 | 1.84567  |
| C | 0.40287  | 11.52565 | 5.45965  |
| H | 0.46894  | 12.55886 | 5.80608  |
| C | 0.81767  | 10.48277 | 6.23924  |
| H | 1.22288  | 10.70978 | 7.22281  |
| C | 0.74339  | 9.13827  | 5.74712  |
| C | 0.17711  | 8.98643  | 4.43623  |
| H | 0.10881  | 8.00177  | 3.98279  |
| C | -0.25194 | 10.07450 | 3.70661  |
| C | -0.85526 | 9.93518  | 2.35569  |
| C | -1.51669 | 8.79248  | 1.96058  |
| H | -1.65253 | 7.99903  | 2.69025  |
| C | -2.03426 | 8.64818  | 0.62835  |
| C | -1.76007 | 9.73572  | -0.26451 |
| H | -2.07106 | 9.71286  | -1.30654 |
| C | -1.14423 | 10.86426 | 0.19716  |
| H | -0.96804 | 11.72453 | -0.45121 |
| C | 1.75195  | 8.30084  | 7.79825  |
| H | 2.08951  | 7.33790  | 8.19506  |
| H | 0.99702  | 8.71491  | 8.48531  |
| H | 2.61955  | 8.97754  | 7.76209  |
| C | 1.09713  | 6.73356  | 5.92500  |
| H | 0.05117  | 6.45643  | 5.71649  |
| H | 1.49178  | 6.03205  | 6.66704  |
| H | 1.69328  | 6.62760  | 5.00492  |
| C | -3.11507 | 6.54727  | 1.21911  |
| H | -2.23191 | 6.02799  | 1.62492  |
| H | -3.74553 | 5.80351  | 0.72115  |
| H | -3.69217 | 6.98935  | 2.04704  |
| C | -3.20488 | 7.44852  | -1.13872 |
| H | -3.91966 | 8.24808  | -1.39097 |
| H | -3.71215 | 6.48532  | -1.25628 |
| H | -2.36007 | 7.48142  | -1.84316 |

Pr-teth6

|   |          |          |         |
|---|----------|----------|---------|
| N | -0.05535 | 11.51801 | 4.25292 |
| N | -1.06265 | 11.22115 | 1.50932 |
| N | 1.23421  | 8.07942  | 6.31531 |
| N | -2.83487 | 7.57326  | 0.36024 |
| C | -0.87719 | 12.67256 | 3.92602 |
| H | -0.84388 | 13.38510 | 4.76463 |
| H | -1.92017 | 12.32314 | 3.84169 |
| C | -0.44707 | 13.35323 | 2.62124 |
| H | 0.42889  | 14.00265 | 2.79238 |
| H | -1.26471 | 13.99988 | 2.25945 |
| C | -0.08951 | 12.30187 | 1.57060 |
| H | 0.00363  | 12.76016 | 0.57382 |
| H | 0.88963  | 11.85445 | 1.81102 |
| C | 0.87036  | 11.59480 | 5.26391 |
| H | 1.18557  | 12.60689 | 5.53642 |
| C | 1.36736  | 10.50366 | 5.89935 |
| H | 2.15109  | 10.62396 | 6.64494 |
| C | 0.81954  | 9.19180  | 5.57017 |
| C | -0.05153 | 9.10494  | 4.51619 |
| H | -0.50969 | 8.15264  | 4.26743 |

|   |          |          |          |
|---|----------|----------|----------|
| C | -0.36793 | 10.24338 | 3.66914  |
| C | -0.93741 | 10.11678 | 2.41540  |
| C | -1.43581 | 8.85425  | 1.89621  |
| H | -1.15400 | 7.95321  | 2.43166  |
| C | -2.25530 | 8.77333  | 0.80129  |
| C | -2.57128 | 10.00617 | 0.08866  |
| H | -3.29721 | 10.02521 | -0.72233 |
| C | -1.93735 | 11.14840 | 0.45299  |
| H | -2.08975 | 12.08417 | -0.09236 |
| C | 1.29906  | 8.18653  | 7.76108  |
| H | 2.00752  | 7.44471  | 8.16315  |
| H | 0.31261  | 8.00515  | 8.24152  |
| H | 1.64312  | 9.18135  | 8.06950  |
| C | 0.82400  | 6.77066  | 5.86444  |
| H | -0.25996 | 6.57216  | 6.01886  |
| H | 1.38549  | 6.00484  | 6.42124  |
| H | 1.04209  | 6.64997  | 4.79271  |
| C | -2.66054 | 6.40666  | 1.19295  |
| H | -1.61412 | 6.02906  | 1.20734  |
| H | -3.30194 | 5.59376  | 0.82024  |
| H | -2.95301 | 6.63265  | 2.22960  |
| C | -2.78689 | 7.27253  | -1.06022 |
| H | -3.01016 | 8.16330  | -1.66053 |
| H | -3.53513 | 6.50232  | -1.30552 |
| H | -1.79188 | 6.89110  | -1.37965 |

Pr-teth6rad

|   |          |          |          |
|---|----------|----------|----------|
| N | -0.42956 | 11.40789 | 4.36548  |
| N | -0.63414 | 11.01938 | 1.41164  |
| N | 1.22743  | 8.14420  | 6.40058  |
| N | -2.82218 | 7.62676  | 0.28977  |
| C | -1.16985 | 12.51760 | 3.76015  |
| H | -1.40944 | 13.24348 | 4.54768  |
| H | -2.12466 | 12.11318 | 3.38840  |
| C | -0.39840 | 13.18274 | 2.62158  |
| H | 0.38244  | 13.84936 | 3.02164  |
| H | -1.09525 | 13.80726 | 2.03917  |
| C | 0.26290  | 12.13437 | 1.72695  |
| H | 0.60457  | 12.58285 | 0.78485  |
| H | 1.15092  | 11.71221 | 2.22386  |
| C | 0.09460  | 11.54260 | 5.61718  |
| H | 0.03640  | 12.54494 | 6.04509  |
| C | 0.63847  | 10.50794 | 6.31598  |
| H | 1.03349  | 10.70604 | 7.30870  |
| C | 0.66896  | 9.18801  | 5.72936  |
| C | 0.13889  | 9.06113  | 4.43601  |
| H | 0.21158  | 8.11753  | 3.90225  |
| C | -0.38203 | 10.16206 | 3.71627  |
| C | -0.87287 | 10.01924 | 2.37249  |
| C | -1.57758 | 8.86270  | 1.96424  |
| H | -1.79991 | 8.13176  | 2.73668  |
| C | -2.07100 | 8.69832  | 0.66122  |
| C | -1.78789 | 9.76043  | -0.27590 |
| H | -2.12368 | 9.72045  | -1.30849 |
| C | -1.09916 | 10.85945 | 0.13926  |
| H | -0.87138 | 11.67518 | -0.54909 |

|   |          |         |          |
|---|----------|---------|----------|
| C | 1.83160  | 8.34479 | 7.71257  |
| H | 2.64009  | 9.09407 | 7.68132  |
| H | 2.26902  | 7.39997 | 8.05559  |
| H | 1.08836  | 8.66691 | 8.46161  |
| C | 1.23897  | 6.82203 | 5.79809  |
| H | 0.21784  | 6.48689 | 5.54612  |
| H | 1.66844  | 6.10224 | 6.50418  |
| H | 1.84351  | 6.79751 | 4.87405  |
| C | -3.22445 | 6.65054 | 1.28879  |
| H | -2.35344 | 6.15169 | 1.74756  |
| H | -3.84372 | 5.88019 | 0.81541  |
| H | -3.81394 | 7.12240 | 2.09570  |
| C | -3.34151 | 7.51228 | -1.06731 |
| H | -4.04289 | 8.32804 | -1.31537 |
| H | -3.88220 | 6.56354 | -1.16472 |
| H | -2.52949 | 7.51310 | -1.81213 |

Pr-teth6biscat

|   |          |          |          |
|---|----------|----------|----------|
| N | -0.67749 | 11.24116 | 4.39490  |
| N | -0.39710 | 10.79684 | 1.42125  |
| N | 1.44775  | 8.26419  | 6.38874  |
| N | -3.04691 | 7.78873  | 0.28052  |
| C | -1.33669 | 12.33459 | 3.64963  |
| H | -1.69955 | 13.07280 | 4.37521  |
| H | -2.22227 | 11.91245 | 3.15255  |
| C | -0.38572 | 12.97786 | 2.63364  |
| H | 0.31850  | 13.65812 | 3.13836  |
| H | -0.98868 | 13.59444 | 1.94789  |
| C | 0.43451  | 11.94110 | 1.85447  |
| H | 0.89160  | 12.38971 | 0.96359  |
| H | 1.25596  | 11.54103 | 2.46628  |
| C | -0.28688 | 11.41257 | 5.68920  |
| H | -0.55933 | 12.36514 | 6.14729  |
| C | 0.39622  | 10.45322 | 6.38614  |
| H | 0.66611  | 10.66950 | 7.41776  |
| C | 0.74062  | 9.20866  | 5.76258  |
| C | 0.28261  | 9.04828  | 4.40843  |
| H | 0.49461  | 8.13933  | 3.85047  |
| C | -0.39798 | 10.05338 | 3.76274  |
| C | -0.85498 | 9.89279  | 2.35038  |
| C | -1.71268 | 8.87878  | 1.99326  |
| H | -2.05693 | 8.20852  | 2.77730  |
| C | -2.16567 | 8.72791  | 0.63644  |
| C | -1.61981 | 9.66450  | -0.30053 |
| H | -1.87177 | 9.62349  | -1.35802 |
| C | -0.77630 | 10.65747 | 0.11954  |
| H | -0.36581 | 11.38883 | -0.57904 |
| C | 1.92290  | 8.47575  | 7.76293  |
| H | 2.52570  | 9.39410  | 7.83391  |
| H | 2.55546  | 7.63141  | 8.05526  |
| H | 1.07944  | 8.53916  | 8.46899  |
| C | 1.75893  | 6.99327  | 5.72422  |
| H | 0.83938  | 6.47112  | 5.41730  |
| H | 2.29898  | 6.34589  | 6.42268  |
| H | 2.39782  | 7.15220  | 4.84080  |
| C | -3.62965 | 6.89306  | 1.28413  |

|   |          |         |          |
|---|----------|---------|----------|
| H | -2.85430 | 6.28720 | 1.77912  |
| H | -4.32804 | 6.21001 | 0.78961  |
| H | -4.18670 | 7.46465 | 2.04430  |
| C | -3.49266 | 7.67254 | -1.11472 |
| H | -3.99896 | 8.59346 | -1.44597 |
| H | -4.20246 | 6.84305 | -1.19565 |
| H | -2.64392 | 7.46296 | -1.78347 |

**7**

|   |          |         |          |
|---|----------|---------|----------|
| O | -4.11850 | 6.39611 | -5.22825 |
| C | -5.22939 | 6.05786 | -4.50876 |
| C | -3.00761 | 6.73436 | -4.50876 |
| H | -6.06454 | 5.79811 | -5.15962 |
| H | -2.17246 | 6.99411 | -5.15962 |
| C | -5.27622 | 6.04403 | -3.16279 |
| C | -2.96078 | 6.74818 | -3.16279 |
| H | -6.21911 | 5.74946 | -2.70210 |
| H | -2.01789 | 7.04275 | -2.70210 |
| C | -4.11850 | 6.39610 | -2.34660 |
| C | -4.11850 | 6.39610 | -0.96669 |
| C | -5.27622 | 6.04403 | -0.15051 |
| C | -2.96078 | 6.74818 | -0.15051 |
| H | -6.21911 | 5.74945 | -0.61119 |
| H | -2.01789 | 7.04275 | -0.61119 |
| C | -5.22939 | 6.05786 | 1.19547  |
| C | -3.00761 | 6.73436 | 1.19547  |
| H | -6.06454 | 5.79810 | 1.84633  |
| H | -2.17247 | 6.99412 | 1.84633  |
| O | -4.11850 | 6.39611 | 1.91496  |

**7<sup>rad</sup>**

|   |          |         |          |
|---|----------|---------|----------|
| O | -4.11850 | 6.39611 | -5.18669 |
| C | -5.22718 | 6.05821 | -4.50750 |
| C | -3.00983 | 6.73401 | -4.50750 |
| H | -6.05650 | 5.80082 | -5.16691 |
| H | -2.18050 | 6.99139 | -5.16691 |
| C | -5.27294 | 6.04471 | -3.14680 |
| C | -2.96407 | 6.74750 | -3.14681 |
| H | -6.21352 | 5.75130 | -2.68336 |
| H | -2.02349 | 7.04092 | -2.68336 |
| C | -4.11850 | 6.39611 | -2.37231 |
| C | -4.11850 | 6.39611 | -0.94098 |
| C | -5.27293 | 6.04471 | -0.16648 |
| C | -2.96407 | 6.74750 | -0.16648 |
| H | -6.21351 | 5.75130 | -0.62993 |
| H | -2.02349 | 7.04092 | -0.62993 |
| C | -5.22718 | 6.05820 | 1.19421  |
| C | -3.00983 | 6.73401 | 1.19421  |
| H | -6.05650 | 5.80082 | 1.85362  |
| H | -2.18051 | 6.99140 | 1.85362  |
| O | -4.11850 | 6.39611 | 1.87340  |

**7<sup>biscat</sup>**

|   |          |         |          |
|---|----------|---------|----------|
| O | -4.11850 | 6.39612 | -5.14428 |
| C | -5.27839 | 6.43520 | -4.50846 |
| C | -2.95862 | 6.35701 | -4.50847 |

|   |          |         |          |
|---|----------|---------|----------|
| H | -6.14000 | 6.47070 | -5.18132 |
| H | -2.09701 | 6.32153 | -5.18134 |
| C | -5.32744 | 6.43232 | -3.12692 |
| C | -2.90956 | 6.35988 | -3.12693 |
| H | -6.30421 | 6.48614 | -2.64186 |
| H | -1.93279 | 6.30606 | -2.64187 |
| C | -4.11850 | 6.39610 | -2.40212 |
| C | -4.11850 | 6.39610 | -0.91042 |
| C | -5.09923 | 5.68572 | -0.18669 |
| C | -3.13777 | 7.10648 | -0.18669 |
| H | -5.87782 | 5.09405 | -0.67228 |
| H | -2.35918 | 7.69815 | -0.67227 |
| C | -5.05778 | 5.71248 | 1.19487  |
| C | -3.17923 | 7.07974 | 1.19487  |
| H | -5.75094 | 5.20322 | 1.87063  |
| H | -2.48608 | 7.58901 | 1.87063  |
| O | -4.11851 | 6.39611 | 1.82800  |

**8**

|   |          |         |          |
|---|----------|---------|----------|
| C | -6.23739 | 1.85265 | -1.08435 |
| C | -5.74086 | 1.59644 | 0.13903  |
| N | -5.71308 | 3.06979 | -1.57479 |
| H | -6.91914 | 1.26012 | -1.69038 |
| C | -4.82664 | 3.54482 | -0.56300 |
| N | -4.82648 | 2.60891 | 0.51498  |
| H | -5.97267 | 0.77948 | 0.81895  |
| C | -4.12355 | 4.70843 | -0.61443 |
| N | -4.41453 | 5.81204 | -1.47342 |
| C | -3.42213 | 6.78047 | -1.19112 |
| C | -2.57391 | 6.31691 | -0.25680 |
| N | -2.96893 | 5.02553 | 0.16568  |
| H | -1.67798 | 6.77961 | 0.15102  |
| H | -3.43744 | 7.74862 | -1.68710 |
| C | -5.79966 | 6.25585 | -1.54586 |
| H | -5.87855 | 7.10513 | -2.24080 |
| H | -6.43777 | 5.44054 | -1.91528 |
| H | -6.18757 | 6.56722 | -0.55413 |
| C | -1.93677 | 4.00569 | 0.28047  |
| H | -2.33898 | 3.10927 | 0.77406  |
| H | -1.54728 | 3.69823 | -0.71200 |
| H | -1.10434 | 4.39516 | 0.88544  |
| C | -4.89669 | 3.13061 | 1.87008  |
| H | -4.92115 | 2.29151 | 2.58160  |
| H | -4.01605 | 3.75117 | 2.08782  |
| H | -5.79469 | 3.76226 | 2.02658  |
| C | -5.26783 | 3.12872 | -2.95779 |
| H | -4.37341 | 2.49750 | -3.13342 |
| H | -6.07854 | 2.78638 | -3.61878 |
| H | -5.00574 | 4.16265 | -3.22520 |

**8<sup>rad</sup>**

|   |          |         |          |
|---|----------|---------|----------|
| C | -6.23650 | 1.88661 | -1.25664 |
| C | -5.95134 | 1.67066 | 0.05296  |
| N | -5.56443 | 3.03502 | -1.66663 |
| H | -6.85418 | 1.31340 | -1.94257 |
| C | -4.84840 | 3.53118 | -0.58320 |

|                 |          |         |          |                               |          |         |          |
|-----------------|----------|---------|----------|-------------------------------|----------|---------|----------|
| N               | -5.10363 | 2.68241 | 0.48516  | H                             | -5.33054 | 2.68430 | -3.75767 |
| H               | -6.30283 | 0.89546 | 0.72839  |                               |          |         |          |
| C               | -4.12196 | 4.74285 | -0.57293 | <b>Et-tethg</b>               |          |         |          |
| N               | -4.50849 | 5.91573 | -1.20796 | C                             | 8.29249  | 4.84507 | 3.13147  |
| C               | -3.48684 | 6.84919 | -1.06644 | C                             | 8.40436  | 4.91119 | 4.47862  |
| C               | -2.47799 | 6.27165 | -0.36479 | N                             | 9.61616  | 5.53694 | 4.82860  |
| N               | -2.85088 | 4.96869 | -0.06332 | N                             | 9.45195  | 5.39525 | 2.51438  |
| H               | -1.50946 | 6.66850 | -0.07317 | C                             | 10.16335 | 4.62820 | 1.48344  |
| H               | -3.57127 | 7.85299 | -1.47408 | C                             | 10.45454 | 5.26809 | 5.99706  |
| C               | -5.89286 | 6.28848 | -1.47306 | C                             | 10.31129 | 5.68674 | 3.60794  |
| H               | -6.45364 | 5.43312 | -1.86765 | C                             | 11.50146 | 5.31163 | 1.12302  |
| H               | -6.38693 | 6.63941 | -0.55140 | N                             | 12.34241 | 5.54611 | 2.29665  |
| H               | -5.91237 | 7.09448 | -2.21829 | C                             | 13.54761 | 4.90182 | 2.63450  |
| C               | -1.94309 | 3.95076 | 0.43483  | C                             | 13.65888 | 4.80948 | 3.98019  |
| H               | -1.91376 | 3.93045 | 1.53492  | N                             | 12.50483 | 5.35952 | 4.60787  |
| H               | -2.26318 | 2.96746 | 0.06155  | C                             | 11.78452 | 4.57756 | 5.62120  |
| H               | -0.93032 | 4.15077 | 0.05746  | C                             | 11.64892 | 5.68116 | 3.51990  |
| C               | -4.76312 | 2.94602 | 1.87112  | H                             | 12.41246 | 4.47460 | 6.51940  |
| H               | -5.53840 | 2.52159 | 2.52249  | H                             | 11.55707 | 3.56341 | 5.22823  |
| H               | -3.79524 | 2.50253 | 2.14889  | H                             | 9.90021  | 4.62753 | 6.69980  |
| H               | -4.72274 | 4.03324 | 2.03720  | H                             | 10.68139 | 6.21806 | 6.51091  |
| C               | -5.19918 | 3.26999 | -3.05915 | H                             | 12.04869 | 4.68046 | 0.40634  |
| H               | -4.92505 | 4.32050 | -3.21412 | H                             | 11.28481 | 6.27488 | 0.62984  |
| H               | -4.34288 | 2.63788 | -3.34840 | H                             | 9.53453  | 4.55437 | 0.58293  |
| H               | -6.05528 | 3.02782 | -3.70283 | H                             | 10.37827 | 3.60252 | 1.85274  |
|                 |          |         |          | H                             | 7.43670  | 4.53635 | 2.53353  |
| <b>g</b> biscat |          |         |          | H                             | 7.65839  | 4.67497 | 5.23600  |
| C               | -5.81231 | 1.60839 | -1.26286 | H                             | 14.29115 | 4.67185 | 1.87280  |
| C               | -6.07978 | 1.78448 | 0.07280  | H                             | 14.51172 | 4.48153 | 4.57209  |
| N               | -5.05011 | 2.67579 | -1.67109 |                               |          |         |          |
| H               | -6.10934 | 0.81245 | -1.94393 | <b>Et-tethgrad (isomer 1)</b> |          |         |          |
| C               | -4.84919 | 3.49902 | -0.61377 | C                             | 8.17460  | 4.88796 | 3.12289  |
| N               | -5.47238 | 2.95461 | 0.45928  | C                             | 8.29561  | 4.91128 | 4.48749  |
| H               | -6.65052 | 1.16703 | 0.76446  | N                             | 9.64636  | 5.10513 | 4.80239  |
| C               | -4.10951 | 4.76066 | -0.61369 | N                             | 9.44381  | 5.11063 | 2.55915  |
| N               | -4.65315 | 6.00095 | -0.65637 | C                             | 10.04762 | 4.71871 | 1.27326  |
| C               | -3.64402 | 6.93002 | -0.59372 | C                             | 10.45747 | 5.23740 | 6.01728  |
| C               | -2.45886 | 6.24035 | -0.51513 | C                             | 10.29952 | 5.21491 | 3.61518  |
| N               | -2.76533 | 4.90144 | -0.52524 | C                             | 11.49810 | 5.28620 | 1.10226  |
| H               | -1.43406 | 6.60239 | -0.45008 | N                             | 12.30770 | 5.12052 | 2.31413  |
| H               | -3.84003 | 8.00115 | -0.60936 | C                             | 13.65578 | 4.90211 | 2.62431  |
| C               | -6.08427 | 6.33197 | -0.72352 | C                             | 13.77628 | 4.84585 | 3.98797  |
| H               | -6.23140 | 7.13201 | -1.46056 | N                             | 12.50985 | 5.07053 | 4.55663  |
| H               | -6.65242 | 5.44826 | -1.03742 | C                             | 11.90188 | 4.65871 | 5.83423  |
| H               | -6.43327 | 6.67535 | 0.26120  | C                             | 11.65545 | 5.20937 | 3.50359  |
| C               | -1.77613 | 3.81602 | -0.45884 | H                             | 12.52004 | 5.01802 | 6.66920  |
| H               | -1.06762 | 4.02516 | 0.35370  | H                             | 11.87093 | 3.55602 | 5.87955  |
| H               | -2.28952 | 2.86856 | -0.25405 | H                             | 9.97433  | 4.69790 | 6.84323  |
| H               | -1.23162 | 3.75016 | -1.41160 | H                             | 10.51650 | 6.30319 | 6.29529  |
| C               | -5.50713 | 3.51317 | 1.81930  | H                             | 11.97595 | 4.75904 | 0.26537  |
| H               | -6.50790 | 3.91603 | 2.03285  | H                             | 11.45061 | 6.35807 | 0.84620  |
| H               | -5.26888 | 2.71800 | 2.53847  | H                             | 9.43323  | 5.10086 | 0.44577  |
| H               | -4.75867 | 4.30971 | 1.90780  | H                             | 10.06709 | 3.61689 | 1.20588  |
| C               | -4.52207 | 2.85044 | -3.03324 | H                             | 7.28208  | 4.76762 | 2.51456  |
| H               | -4.13280 | 3.86986 | -3.14732 | H                             | 7.52378  | 4.83143 | 5.24881  |
| H               | -3.71691 | 2.12401 | -3.21332 | H                             | 14.42671 | 4.83067 | 1.86125  |

|                                             |          |         |         |
|---------------------------------------------|----------|---------|---------|
| H                                           | 14.66688 | 4.70027 | 4.59358 |
| <b>Et-tethg<sup>grad</sup> (isomer 2)</b>   |          |         |         |
| C                                           | 8.14288  | 4.87560 | 3.05275 |
| C                                           | 8.23626  | 4.92808 | 4.41868 |
| N                                           | 9.58818  | 5.09090 | 4.76387 |
| N                                           | 9.43435  | 5.00247 | 2.51600 |
| C                                           | 10.05568 |         | 4.63555 |
| 1.23332                                     |          |         |         |
| C                                           | 10.38092 |         | 4.81037 |
| 5.97175                                     |          |         |         |
| C                                           | 10.27224 |         | 5.06810 |
| 3.58678                                     |          |         |         |
| C                                           | 11.51426 |         | 5.18599 |
| 1.11437                                     |          |         |         |
| N                                           | 12.30724 |         | 4.90429 |
| 2.32195                                     |          |         |         |
| C                                           | 13.65917 |         | 5.06693 |
| 2.66722                                     |          |         |         |
| C                                           | 13.75249 |         | 5.11894 |
| 4.03319                                     |          |         |         |
| N                                           | 12.46102 |         | 4.99156 |
| 4.56983                                     |          |         |         |
| C                                           | 11.83988 |         | 5.35996 |
| 5.85231                                     |          |         |         |
| C                                           | 11.62307 |         | 4.92699 |
| 3.49900                                     |          |         |         |
| H                                           | 11.83350 |         | 6.45996 |
| 5.94785                                     |          |         |         |
| H                                           | 12.42921 |         | 4.94747 |
| 6.68292                                     |          |         |         |
| H                                           | 10.40542 |         | 3.71987 |
| 6.14199                                     |          |         |         |
| H                                           | 9.90833  | 5.28238 | 6.84428 |
| H                                           | 11.98746 |         | 4.71594 |
| 0.24120                                     |          |         |         |
| H                                           | 11.48847 |         | 6.27683 |
| 0.94651                                     |          |         |         |
| H                                           | 9.46617  | 5.04842 | 0.40297 |
| H                                           | 10.06194 |         | 3.53567 |
| 1.13643                                     |          |         |         |
| H                                           | 7.25671  | 4.80663 | 2.42697 |
| H                                           | 7.44277  | 4.91280 | 5.16167 |
| H                                           | 14.45250 |         | 5.08199 |
| 1.92402                                     |          |         |         |
| H                                           | 14.63853 |         | 5.18787 |
| 4.65917                                     |          |         |         |
| <b>Et-tethg<sup>biscat</sup> (isomer 1)</b> |          |         |         |
| C                                           | 8.16211  | 4.93604 | 3.11585 |
| C                                           | 8.28620  | 4.99022 | 4.49418 |
| N                                           | 9.64423  | 5.00208 | 4.78616 |
| N                                           | 9.44575  | 4.93508 | 2.58510 |
| C                                           | 10.02858 | 4.71764 | 1.22894 |
| C                                           | 10.46155 | 5.20348 | 6.01752 |
| C                                           | 10.27980 | 4.97189 | 3.61938 |

|                                             |          |         |          |
|---------------------------------------------|----------|---------|----------|
| C                                           | 11.49369 | 5.25171 | 1.10139  |
| N                                           | 12.30841 | 5.01427 | 2.32795  |
| C                                           | 13.66613 | 4.97876 | 2.61928  |
| C                                           | 13.78952 | 4.89199 | 3.99600  |
| N                                           | 12.50598 | 4.89442 | 4.52678  |
| C                                           | 11.92085 | 4.65618 | 5.87858  |
| C                                           | 11.67241 | 4.96481 | 3.49390  |
| H                                           | 12.54578 | 5.15323 | 6.63266  |
| H                                           | 11.96020 | 3.57105 | 6.06258  |
| H                                           | 9.97835  | 4.68413 | 6.85615  |
| H                                           | 10.45920 | 6.28280 | 6.23566  |
| H                                           | 11.97113 | 4.74538 | 0.25156  |
| H                                           | 11.50798 | 6.33545 | 0.90681  |
| H                                           | 9.40932  | 5.23628 | 0.48486  |
| H                                           | 9.97734  | 3.63690 | 1.02337  |
| H                                           | 7.26441  | 4.89680 | 2.50047  |
| H                                           | 7.51276  | 5.02276 | 5.26047  |
| H                                           | 14.43991 | 5.01881 | 1.85368  |
| H                                           | 14.68657 | 4.82714 | 4.61016  |
| <b>Et-tethg<sup>biscat</sup> (isomer 2)</b> |          |         |          |
| C                                           | 8.14558  | 4.85971 | 3.04743  |
| C                                           | 8.24079  | 4.90982 | 4.42766  |
| N                                           | 9.58983  | 5.00098 | 4.74584  |
| N                                           | 9.43763  | 4.92037 | 2.54148  |
| C                                           | 10.04550 | 4.65587 | 1.20420  |
| C                                           | 10.37721 | 4.83058 | 6.00162  |
| C                                           | 10.24978 | 5.00119 | 3.59131  |
| C                                           | 11.51800 | 5.16559 | 1.08445  |
| N                                           | 12.30542 | 4.99376 | 2.34007  |
| C                                           | 13.65453 | 5.08508 | 2.65815  |
| C                                           | 13.74988 | 5.13510 | 4.03832  |
| N                                           | 12.45785 | 5.07454 | 4.54449  |
| C                                           | 11.84982 | 5.34004 | 5.88145  |
| C                                           | 11.64562 | 4.99405 | 3.49468  |
| H                                           | 11.90833 | 6.42731 | 6.04755  |
| H                                           | 12.44882 | 4.84361 | 6.65665  |
| H                                           | 10.34841 | 3.75834 | 6.25138  |
| H                                           | 9.88665  | 5.38379 | 6.81379  |
| H                                           | 12.00858 | 4.61329 | 0.27170  |
| H                                           | 11.54658 | 6.23815 | 0.83614  |
| H                                           | 9.44623  | 5.15284 | 0.42958  |
| H                                           | 9.98685  | 3.56871 | 1.03765  |
| H                                           | 7.26256  | 4.78696 | 2.41399  |
| H                                           | 7.45304  | 4.88772 | 5.17971  |
| H                                           | 14.44218 | 5.10683 | 1.90598  |
| H                                           | 14.63297 |         | 5.20738  |
| 4.67172                                     |          |         |          |
| <b>Pr-tethg</b>                             |          |         |          |
| N                                           | -3.83475 | 0.84152 | 10.81962 |
| N                                           | -1.03398 | 1.98562 | 11.16448 |
| C                                           | -3.32164 | 1.47224 | 11.99405 |
| C                                           | -2.06766 | 1.97289 | 12.15145 |
| N                                           | -4.40960 | 1.62984 | 12.90696 |
| N                                           | -1.60281 | 2.73139 | 13.26860 |





|   |          |          |          |   |          |         |          |
|---|----------|----------|----------|---|----------|---------|----------|
| H | -6.36360 | 0.60153  | 12.98005 | C | -4.87657 | 3.59152 | -0.59609 |
| H | 0.56509  | 2.88154  | 14.04873 | N | -4.72143 | 2.58402 | 0.39605  |
| H | -5.51020 | -0.73776 | 10.69736 | H | -5.95704 | 0.90245 | 0.80747  |
| H | 1.11142  | 2.43878  | 11.35833 | C | -4.21353 | 4.77071 | -0.62202 |
| H | -4.75640 | 1.37373  | 15.01814 | N | -4.51543 | 5.84314 | -1.50985 |
| H | -5.38816 | 2.72782  | 14.05883 | C | -3.42480 | 6.81225 | -1.37024 |
| H | -3.59297 | 3.37435  | 15.63511 | C | -2.88222 | 6.54148 | 0.04588  |
| H | -3.17781 | 3.81240  | 13.98247 | N | -3.12057 | 5.10740 | 0.22893  |
| H | -1.31978 | 2.68286  | 15.45333 | H | -1.81628 | 6.78331 | 0.16752  |
| H | -2.18075 | 1.15791  | 15.19485 | H | -2.64006 | 6.61786 | -2.12418 |
| H | -0.12280 | 0.57836  | 9.81662  | H | -3.44638 | 7.12510 | 0.79521  |
| H | -0.52687 | 2.25152  | 9.38732  | H | -3.79136 | 7.83899 | -1.51631 |
| H | -1.96019 | 0.55266  | 8.29196  | H | -7.41923 | 2.37877 | -0.44243 |
| H | -2.92306 | 1.71159  | 9.20499  | H | -4.85339 | 0.70007 | -0.58004 |
| H | -3.52948 | -0.82920 | 9.42645  | C | -5.87460 | 6.36304 | -1.46390 |
| H | -2.09426 | -0.98561 | 10.45489 | H | -6.00392 | 7.13777 | -2.23493 |

Pr-teth<sup>g</sup>biscat (isomer 2)

|   |          |         |          |
|---|----------|---------|----------|
| C | 8.09911  | 4.74799 | 3.27911  |
| C | 8.27758  | 4.89769 | 4.62104  |
| N | 9.63003  | 4.97151 | 4.85469  |
| N | 9.34310  | 4.72344 | 2.69490  |
| C | 9.41808  | 4.58676 | 1.21460  |
| C | 10.77293 | 4.23381 | 0.64357  |
| C | 10.09025 | 5.05580 | 6.26699  |
| C | 10.29707 | 4.86397 | 3.66540  |
| H | 8.68465  | 3.81260 | 0.95088  |
| H | 9.05887  | 5.54039 | 0.79603  |
| H | 11.11304 | 3.23613 | 0.96670  |
| H | 10.64183 | 4.17716 | -0.44826 |
| H | 9.40438  | 5.75620 | 6.76199  |
| H | 9.92047  | 4.05961 | 6.70592  |
| C | 11.83593 | 5.27637 | 0.94120  |
| N | 12.40374 | 5.10027 | 2.29059  |
| C | 13.75794 | 5.08275 | 2.51365  |
| C | 13.94702 | 4.88651 | 3.85284  |
| N | 12.70577 | 4.77431 | 4.42846  |
| C | 12.53745 | 4.54456 | 5.87477  |
| C | 11.52172 | 5.49127 | 6.48536  |
| C | 11.74696 | 4.90797 | 3.46918  |
| H | 11.67570 | 5.49525 | 7.57587  |
| H | 11.69983 | 6.52385 | 6.14316  |
| H | 12.26441 | 3.48830 | 6.03404  |
| H | 13.52807 | 4.70342 | 6.31854  |
| H | 11.44440 | 6.30321 | 0.85092  |
| H | 12.68002 | 5.18004 | 0.24735  |
| H | 14.86386 | 4.81236 | 4.43422  |
| H | 14.47921 | 5.21590 | 1.70988  |
| H | 7.18643  | 4.65358 | 2.69419  |
| H | 7.55082  | 4.95186 | 5.42909  |

**9**

|   |          |         |          |
|---|----------|---------|----------|
| C | -6.53178 | 2.03698 | -1.00645 |
| C | -5.49906 | 1.42291 | -0.04677 |
| N | -5.82789 | 3.18903 | -1.57653 |
| H | -6.87234 | 1.35034 | -1.79481 |

|   |          |         |          |
|---|----------|---------|----------|
| C | -4.87657 | 3.59152 | -0.59609 |
| N | -4.72143 | 2.58402 | 0.39605  |
| H | -5.95704 | 0.90245 | 0.80747  |
| C | -4.21353 | 4.77071 | -0.62202 |
| N | -4.51543 | 5.84314 | -1.50985 |
| C | -3.42480 | 6.81225 | -1.37024 |
| C | -2.88222 | 6.54148 | 0.04588  |
| N | -3.12057 | 5.10740 | 0.22893  |
| H | -1.81628 | 6.78331 | 0.16752  |
| H | -2.64006 | 6.61786 | -2.12418 |
| H | -3.44638 | 7.12510 | 0.79521  |
| H | -3.79136 | 7.83899 | -1.51631 |
| H | -7.41923 | 2.37877 | -0.44243 |
| H | -4.85339 | 0.70007 | -0.58004 |
| C | -5.87460 | 6.36304 | -1.46390 |
| H | -6.00392 | 7.13777 | -2.23493 |
| H | -6.57639 | 5.54431 | -1.67933 |
| H | -6.14591 | 6.79963 | -0.47855 |
| C | -1.95637 | 4.23547 | 0.16156  |
| H | -2.27063 | 3.20241 | 0.37440  |
| H | -1.45802 | 4.24482 | -0.83127 |
| H | -1.22167 | 4.53675 | 0.92417  |
| C | -4.83184 | 2.98208 | 1.78921  |
| H | -5.85367 | 3.31659 | 2.07127  |
| H | -4.54191 | 2.14207 | 2.43961  |
| H | -4.14390 | 3.81803 | 1.98005  |
| C | -5.33861 | 3.05812 | -2.94267 |
| H | -4.89539 | 4.01516 | -3.25617 |
| H | -4.56776 | 2.26817 | -3.06401 |
| H | -6.17819 | 2.82748 | -3.61719 |

**grad**

|   |          |         |          |
|---|----------|---------|----------|
| C | -6.02259 | 1.68931 | -1.34616 |
| C | -5.87959 | 1.63131 | 0.17339  |
| N | -5.60904 | 3.06394 | -1.66686 |
| H | -5.34094 | 0.97794 | -1.84826 |
| C | -4.88346 | 3.56011 | -0.61003 |
| N | -4.91562 | 2.70290 | 0.46325  |
| H | -6.83711 | 1.86187 | 0.67719  |
| C | -4.18792 | 4.79799 | -0.61535 |
| N | -4.61373 | 5.92958 | -1.26864 |
| C | -3.74555 | 7.04842 | -0.87044 |
| C | -2.49881 | 6.34644 | -0.33923 |
| N | -3.00322 | 5.02053 | 0.04721  |
| H | -1.73215 | 6.22993 | -1.12796 |
| H | -3.53997 | 7.71849 | -1.71708 |
| H | -2.03617 | 6.86219 | 0.51403  |
| H | -4.24835 | 7.63488 | -0.07884 |
| H | -7.04509 | 1.48446 | -1.69624 |
| H | -5.51909 | 0.65959 | 0.54091  |
| C | -6.02451 | 6.24191 | -1.46421 |
| H | -6.11896 | 7.00285 | -2.25124 |
| H | -6.58416 | 5.35126 | -1.77056 |
| H | -6.47507 | 6.64135 | -0.53616 |
| C | -1.99928 | 3.97983 | 0.23199  |
| H | -1.28274 | 4.30728 | 0.99756  |

|                |          |          |          |               |          |          |          |
|----------------|----------|----------|----------|---------------|----------|----------|----------|
| H              | -2.46250 | 3.04303  | 0.56286  | C             | 4.17091  | -0.91212 | 16.74808 |
| H              | -1.44765 | 3.79037  | -0.70786 | C             | 5.04212  | -0.21856 | 17.53180 |
| C              | -4.86008 | 3.16671  | 1.84478  | H             | 2.15839  | -0.89964 | 14.66831 |
| H              | -5.83965 | 3.56605  | 2.16918  | H             | 2.97881  | -3.46267 | 16.15461 |
| H              | -4.59085 | 2.32277  | 2.49537  | H             | 7.53218  | 1.16952  | 17.87330 |
| H              | -4.10755 | 3.95353  | 1.96358  | H             | 5.51852  | 0.79037  | 20.16951 |
| C              | -5.26746 | 3.32789  | -3.05921 | H             | 7.70599  | 0.13634  | 19.32570 |
| H              | -4.95032 | 4.36844  | -3.19308 | H             | 5.95649  | 2.31298  | 19.33210 |
| H              | -4.45022 | 2.66454  | -3.39718 | H             | 3.31790  | -3.02438 | 14.45307 |
| H              | -6.14879 | 3.14054  | -3.68912 | H             | 1.20839  | -1.83895 | 15.86153 |
| <b>gbiscat</b> |          |          |          | C             | 1.99974  | -0.30528 | 17.80425 |
| C              | -5.77055 | 1.52833  | -1.34488 | C             | 0.79745  | 0.38904  | 17.58209 |
| C              | -6.04911 | 1.69599  | 0.16737  | C             | 2.40964  | -0.54572 | 19.12783 |
| N              | -5.03861 | 2.77115  | -1.69335 | C             | 0.04181  | 0.85211  | 18.65762 |
| H              | -5.13962 | 0.65748  | -1.57901 | C             | 1.64707  | -0.07975 | 20.19768 |
| C              | -4.93045 | 3.54209  | -0.62388 | C             | 0.46437  | 0.63173  | 19.97288 |
| N              | -5.48385 | 3.03693  | 0.46664  | H             | 0.48841  | 0.61145  | 16.55890 |
| H              | -7.12051 | 1.67828  | 0.41892  | H             | 3.33328  | -1.09261 | 19.31185 |
| C              | -4.19938 | 4.84614  | -0.62676 | H             | -0.87288 | 1.41802  | 18.46289 |
| N              | -4.79808 | 6.02507  | -0.61570 | H             | 1.98647  | -0.28164 | 21.21791 |
| C              | -3.77660 | 7.10402  | -0.64273 | H             | -0.12141 | 1.01557  | 20.81116 |
| C              | -2.44452 | 6.32682  | -0.54860 | C             | 5.68934  | -2.17744 | 15.20581 |
| N              | -2.87762 | 4.90932  | -0.61620 | C             | 6.60298  | -1.13033 | 14.97800 |
| H              | -1.75422 | 6.54649  | -1.37603 | C             | 6.02043  | -3.47260 | 14.76001 |
| H              | -3.88054 | 7.67657  | -1.57781 | C             | 7.81895  | -1.38647 | 14.34479 |
| H              | -1.91005 | 6.49506  | 0.39957  | C             | 7.23735  | -3.71393 | 14.12472 |
| H              | -3.93990 | 7.79102  | 0.20079  | C             | 8.15188  | -2.67626 | 13.92020 |
| H              | -6.68704 | 1.46045  | -1.95107 | H             | 6.35114  | -0.12002 | 15.29657 |
| H              | -5.53860 | 0.94425  | 0.78836  | H             | 5.33370  | -4.29910 | 14.95166 |
| C              | -6.22494 | 6.32682  | -0.66114 | H             | 8.51357  | -0.55997 | 14.17201 |
| H              | -6.47651 | 6.82268  | -1.61199 | H             | 7.48259  | -4.72847 | 13.79870 |
| H              | -6.81560 | 5.40740  | -0.56139 | H             | 9.10865  | -2.87202 | 13.43071 |
| H              | -6.47989 | 7.00664  | 0.16561  | C             | 3.88772  | 1.99548  | 17.74140 |
| C              | -1.91719 | 3.81341  | -0.55455 | C             | 3.55660  | 2.14701  | 16.38067 |
| H              | -1.35080 | 3.86398  | 0.38863  | C             | 3.28898  | 2.85337  | 18.68308 |
| H              | -2.43480 | 2.84793  | -0.61284 | C             | 2.63513  | 3.11850  | 15.98780 |
| H              | -1.21059 | 3.89521  | -1.39447 | C             | 2.37615  | 3.82509  | 18.27723 |
| C              | -5.53403 | 3.61110  | 1.80685  | C             | 2.03232  | 3.95991  | 16.92794 |
| H              | -6.58079 | 3.78999  | 2.09915  | H             | 4.02237  | 1.49661  | 15.64061 |
| H              | -5.08280 | 2.91070  | 2.52588  | H             | 3.50635  | 2.71526  | 19.74365 |
| H              | -4.98334 | 4.55971  | 1.83908  | H             | 2.38331  | 3.22234  | 14.92842 |
| C              | -4.55029 | 3.00815  | -3.04816 | H             | 1.90838  | 4.46627  | 19.02838 |
| H              | -4.13071 | 4.01901  | -3.13510 | H             | 1.30392  | 4.71013  | 16.61169 |
| H              | -3.77402 | 2.27014  | -3.30318 | C             | 6.75953  | -1.93359 | 18.11553 |
| H              | -5.38262 | 2.89996  | -3.76043 | C             | 5.84050  | -2.97762 | 18.33023 |
| <b>Phg</b>     |          |          |          | C             | 8.13514  | -2.23716 | 18.12553 |
| N              | 2.77751  | -0.70306 | 16.70349 | C             | 6.29120  | -4.28362 | 18.52315 |
| N              | 4.47697  | -1.96866 | 15.87001 | C             | 8.57413  | -3.54342 | 18.33357 |
| N              | 6.35252  | -0.61005 | 17.88255 | C             | 7.65626  | -4.58131 | 18.52177 |
| N              | 4.76325  | 0.99845  | 18.18606 | H             | 4.77407  | -2.76103 | 18.35091 |
| C              | 2.21592  | -1.48623 | 15.60355 | H             | 8.86023  | -1.44298 | 17.93796 |
| C              | 3.23586  | -2.62916 | 15.47456 | H             | 5.55959  | -5.07912 | 18.68791 |
| C              | 6.99498  | 0.50837  | 18.57721 | H             | 9.64659  | -3.75591 | 18.33178 |
| C              | 5.79043  | 1.23634  | 19.19405 | H             | 8.00363  | -5.60624 | 18.67170 |
|                |          |          |          | <b>Phgrad</b> |          |          |          |

|   |          |          |          |                    |          |          |          |
|---|----------|----------|----------|--------------------|----------|----------|----------|
| N | 2.77901  | -1.15269 | 17.07828 | C                  | 7.86927  | -4.39889 | 18.54235 |
| N | 4.56894  | -2.09422 | 16.11352 | H                  | 4.95910  | -2.68255 | 19.02528 |
| N | 6.25924  | -0.53041 | 18.09543 | H                  | 8.76422  | -1.25298 | 17.56858 |
| N | 4.70958  | 1.08404  | 17.95814 | H                  | 5.90313  | -4.96820 | 19.24379 |
| C | 2.23379  | -2.06696 | 16.06464 | H                  | 9.71832  | -3.52762 | 17.83884 |
| C | 3.43838  | -2.97540 | 15.78079 | H                  | 8.28926  | -5.40098 | 18.65352 |
| C | 6.94964  | 0.69971  | 18.50636 |                    |          |          |          |
| C | 5.77196  | 1.63269  | 18.81594 |                    |          |          |          |
| C | 4.14356  | -1.11928 | 16.97780 | Phg <b>b</b> iscat |          |          |          |
| C | 4.99730  | -0.22217 | 17.66136 | N                  | 2.84557  | -1.23926 | 17.23378 |
| H | 1.91518  | -1.50808 | 15.16657 | N                  | 4.53851  | -1.88603 | 15.94362 |
| H | 3.43980  | -3.86858 | 16.42870 | N                  | 6.16455  | -0.54365 | 18.24187 |
| H | 7.57646  | 1.08803  | 17.68511 | N                  | 4.82251  | 1.15440  | 17.71828 |
| H | 5.47551  | 1.58072  | 19.87823 | C                  | 2.21858  | -2.12298 | 16.21990 |
| H | 7.58717  | 0.50347  | 19.37779 | C                  | 3.43759  | -2.82339 | 15.60607 |
| H | 5.96747  | 2.67816  | 18.54518 | C                  | 6.91862  | 0.65501  | 18.68304 |
| H | 3.50353  | -3.29673 | 14.73390 | C                  | 5.86275  | 1.77158  | 18.58031 |
| H | 1.37077  | -2.60949 | 16.47127 | C                  | 4.13553  | -1.09807 | 16.93871 |
| C | 1.98795  | -0.49892 | 18.05078 | C                  | 5.04170  | -0.15546 | 17.64411 |
| C | 0.79574  | 0.12418  | 17.65755 | H                  | 1.67854  | -1.49835 | 15.48942 |
| C | 2.39743  | -0.44981 | 19.39146 | H                  | 3.64486  | -3.79624 | 16.08072 |
| C | 0.03814  | 0.82466  | 18.59472 | H                  | 7.76827  | 0.81603  | 18.00139 |
| C | 1.63817  | 0.26311  | 20.31897 | H                  | 5.42084  | 2.02878  | 19.55596 |
| C | 0.46169  | 0.90772  | 19.92459 | H                  | 7.30212  | 0.50245  | 19.70013 |
| H | 0.48471  | 0.09800  | 16.61215 | H                  | 6.24039  | 2.68705  | 18.10725 |
| H | 3.30454  | -0.96875 | 19.70518 | H                  | 3.37075  | -2.95624 | 14.51952 |
| H | -0.87878 | 1.32593  | 18.27711 | H                  | 1.51149  | -2.80884 | 16.70256 |
| H | 1.96374  | 0.30373  | 21.36134 | C                  | 2.10556  | -0.54078 | 18.23261 |
| H | -0.12899 | 1.46531  | 20.65407 | C                  | 0.86894  | 0.01815  | 17.88935 |
| C | 5.80971  | -2.13939 | 15.43787 | C                  | 2.61876  | -0.41328 | 19.53055 |
| C | 6.36731  | -3.38551 | 15.11765 | C                  | 0.16033  | 0.74263  | 18.84676 |
| C | 6.48073  | -0.96042 | 15.07265 | C                  | 1.90345  | 0.32234  | 20.47680 |
| C | 7.59298  | -3.44940 | 14.45443 | C                  | 0.67739  | 0.90312  | 20.13660 |
| C | 7.71349  | -1.03612 | 14.42617 | H                  | 0.47002  | -0.08432 | 16.87972 |
| C | 8.27664  | -2.27824 | 14.11713 | H                  | 3.54966  | -0.90781 | 19.81402 |
| H | 5.85473  | -4.30241 | 15.41218 | H                  | -0.80009 | 1.18863  | 18.58013 |
| H | 6.03503  | 0.01283  | 15.28076 | H                  | 2.29312  | 0.41934  | 21.49266 |
| H | 8.02399  | -4.42222 | 14.20702 | H                  | 0.11487  | 1.46603  | 20.88414 |
| H | 8.22953  | -0.11623 | 14.14066 | C                  | 5.83689  | -1.95531 | 15.35958 |
| H | 9.23896  | -2.33212 | 13.60400 | C                  | 6.37759  | -3.20956 | 15.05086 |
| C | 3.69618  | 1.88450  | 17.38208 | C                  | 6.55092  | -0.77875 | 15.08950 |
| C | 3.32337  | 1.72460  | 16.03813 | C                  | 7.65932  | -3.28307 | 14.50533 |
| C | 3.06192  | 2.85505  | 18.17072 | C                  | 7.83797  | -0.86721 | 14.55906 |
| C | 2.29576  | 2.50333  | 15.50707 | C                  | 8.39518  | -2.11759 | 14.27102 |
| C | 2.04927  | 3.64286  | 17.62337 | H                  | 5.81833  | -4.12394 | 15.25040 |
| C | 1.65344  | 3.46389  | 16.29457 | H                  | 6.09668  | 0.20002  | 15.25314 |
| H | 3.83800  | 0.99805  | 15.40835 | H                  | 8.08698  | -4.25741 | 14.25937 |
| H | 3.33973  | 2.97234  | 19.21941 | H                  | 8.39456  | 0.04494  | 14.33348 |
| H | 2.00172  | 2.36480  | 14.46378 | H                  | 9.39500  | -2.18182 | 13.83664 |
| H | 1.55369  | 4.38863  | 18.24848 | C                  | 3.72321  | 1.87104  | 17.15499 |
| H | 0.85520  | 4.07687  | 15.87117 | C                  | 3.32154  | 1.60850  | 15.83780 |
| C | 6.79723  | -1.82702 | 18.26634 | C                  | 3.05254  | 2.82015  | 17.93514 |
| C | 5.99483  | -2.87580 | 18.74093 | C                  | 2.20915  | 2.27084  | 15.31670 |
| C | 8.14260  | -2.06309 | 17.95232 | C                  | 1.95509  | 3.49148  | 17.39428 |
| C | 6.53057  | -4.15722 | 18.86723 | C                  | 1.52569  | 3.21333  | 16.09233 |
| C | 8.67221  | -3.34616 | 18.09483 | H                  | 3.88679  | 0.91720  | 15.20975 |
|   |          |          |          | H                  | 3.36333  | 3.02131  | 18.96110 |

|           |          |          |          |                            |          |          |          |
|-----------|----------|----------|----------|----------------------------|----------|----------|----------|
| H         | 1.88910  | 2.06671  | 14.29236 | C                          | -2.36811 | 9.03559  | -1.04477 |
| H         | 1.42574  | 4.22946  | 18.00030 | H                          | -2.22400 | 10.05654 | -1.40688 |
| H         | 0.66790  | 3.74459  | 15.67455 |                            |          |          |          |
| C         | 6.65755  | -1.87954 | 18.34622 | <b>10<sup>rad</sup></b>    |          |          |          |
| C         | 5.79151  | -2.91108 | 18.73491 | C                          | -5.68956 | 1.59496  | -1.28322 |
| C         | 8.00041  | -2.14062 | 18.04996 | C                          | -6.35386 | 1.98556  | -0.10292 |
| C         | 6.26876  | -4.22190 | 18.78406 | N                          | -4.80636 | 2.61965  | -1.62327 |
| C         | 8.46796  | -3.45378 | 18.11749 | C                          | -4.90079 | 3.62369  | -0.66887 |
| C         | 7.60494  | -4.49495 | 18.47382 | N                          | -5.84201 | 3.22752  | 0.27100  |
| H         | 4.76574  | -2.69095 | 19.03737 | C                          | -4.21648 | 4.85575  | -0.67070 |
| H         | 8.67337  | -1.33723 | 17.74875 | N                          | -4.75815 | 6.08207  | -0.31398 |
| H         | 5.60379  | -5.02813 | 19.10026 | C                          | -3.75397 | 7.04750  | -0.35733 |
| H         | 9.51351  | -3.66582 | 17.88505 | C                          | -2.56857 | 6.40254  | -0.76555 |
| H         | 7.98151  | -5.51861 | 18.53310 | N                          | -2.87358 | 5.05506  | -0.95588 |
|           |          |          |          | C                          | -6.17210 | 6.40979  | -0.24142 |
| <b>10</b> |          |          |          | H                          | -6.39418 | 7.23324  | -0.93704 |
| C         | -6.29044 | 1.96238  | -1.27930 | H                          | -6.77136 | 5.53859  | -0.52907 |
| C         | -5.75598 | 1.63507  | -0.01485 | H                          | -6.45514 | 6.72152  | 0.77560  |
| N         | -5.80140 | 3.22224  | -1.66279 | C                          | -1.86691 | 4.01196  | -1.05571 |
| C         | -4.94105 | 3.67316  | -0.61910 | H                          | -1.01576 | 4.26794  | -0.40789 |
| N         | -4.91286 | 2.67860  | 0.40133  | H                          | -2.29047 | 3.05870  | -0.71517 |
| C         | -4.26508 | 4.85187  | -0.59561 | H                          | -1.50087 | 3.89662  | -2.08732 |
| N         | -4.57758 | 6.00993  | -1.36725 | C                          | -5.97598 | 3.76336  | 1.61695  |
| C         | -3.61206 | 6.98315  | -1.05494 | H                          | -6.99648 | 4.13406  | 1.79545  |
| C         | -2.71198 | 6.44296  | -0.11192 | H                          | -5.75097 | 2.97476  | 2.35230  |
| N         | -3.10618 | 5.12686  | 0.19208  | H                          | -5.26760 | 4.58708  | 1.76132  |
| C         | -5.96908 | 6.41292  | -1.51110 | C                          | -4.20586 | 2.75089  | -2.93974 |
| H         | -6.05149 | 7.20356  | -2.26978 | H                          | -3.93430 | 3.79895  | -3.11845 |
| H         | -6.57745 | 5.55945  | -1.83663 | H                          | -3.30659 | 2.12407  | -3.03816 |
| H         | -6.38605 | 6.79064  | -0.55704 | H                          | -4.93456 | 2.44245  | -3.70431 |
| C         | -2.07338 | 4.10397  | 0.28771  | C                          | -7.31710 | 1.17509  | 0.49608  |
| H         | -2.49348 | 3.16798  | 0.67806  | H                          | -7.82928 | 1.47432  | 1.41143  |
| H         | -1.62167 | 3.89218  | -0.70112 | C                          | -5.97712 | 0.38365  | -1.91181 |
| H         | -1.28482 | 4.44167  | 0.97291  | C                          | -7.60780 | -0.04011 | -0.13567 |
| C         | -4.91471 | 3.08240  | 1.79882  | H                          | -5.46214 | 0.07173  | -2.82156 |
| H         | -5.89928 | 3.48590  | 2.10650  | H                          | -8.35803 | -0.70212 | 0.30093  |
| H         | -4.66714 | 2.22048  | 2.43456  | C                          | -6.95423 | -0.42503 | -1.31790 |
| H         | -4.16172 | 3.86204  | 1.96794  | H                          | -7.21287 | -1.37755 | -1.78469 |
| C         | -5.41659 | 3.43150  | -3.05113 | C                          | -1.36539 | 7.09853  | -0.88127 |
| H         | -5.05496 | 4.45835  | -3.18989 | H                          | -0.44362 | 6.60371  | -1.18928 |
| H         | -4.61070 | 2.73747  | -3.35702 | C                          | -1.39125 | 8.46882  | -0.59401 |
| H         | -6.28424 | 3.27408  | -3.70791 | C                          | -3.78528 | 8.41616  | -0.09258 |
| C         | -6.09909 | 0.44605  | 0.61916  | H                          | -0.46791 | 9.04657  | -0.66828 |
| H         | -5.68874 | 0.19031  | 1.59800  | H                          | -4.70223 | 8.92151  | 0.21398  |
| C         | -7.13640 | 1.08566  | -1.94891 | C                          | -2.57954 | 9.11617  | -0.21966 |
| C         | -6.97427 | -0.43282 | -0.04764 | H                          | -2.56238 | 10.18765 | -0.01080 |
| H         | -7.54138 | 1.33130  | -2.93246 |                            |          |          |          |
| H         | -7.26069 | -1.37072 | 0.43419  | <b>10<sup>biscat</sup></b> |          |          |          |
| C         | -7.47709 | -0.12304 | -1.31201 | C                          | -5.82207 | 1.68561  | -1.36231 |
| H         | -8.14560 | -0.82403 | -1.81727 | C                          | -6.18896 | 1.88730  | -0.01286 |
| C         | -1.62789 | 7.17968  | 0.35119  | N                          | -5.04169 | 2.77785  | -1.73111 |
| H         | -0.92685 | 6.75934  | 1.07453  | C                          | -4.92704 | 3.60473  | -0.66609 |
| C         | -1.46409 | 8.49191  | -0.13084 | N                          | -5.60206 | 3.08518  | 0.38519  |
| C         | -3.46204 | 8.28623  | -1.51854 | C                          | -4.20175 | 4.87660  | -0.64287 |
| H         | -0.62105 | 9.09037  | 0.22188  | N                          | -4.77981 | 6.09829  | -0.58297 |
| H         | -4.16001 | 8.71421  | -2.24063 | C                          | -3.77672 | 7.06189  | -0.53541 |

|   |          |          |          |
|---|----------|----------|----------|
| C | -2.54662 | 6.36817  | -0.57214 |
| N | -2.85623 | 5.01283  | -0.63700 |
| C | -6.21232 | 6.39777  | -0.58336 |
| H | -6.42562 | 7.13800  | -1.36665 |
| H | -6.78407 | 5.48574  | -0.79142 |
| H | -6.50886 | 6.80947  | 0.39257  |
| C | -1.86550 | 3.93653  | -0.66108 |
| H | -1.18132 | 4.05553  | 0.19079  |
| H | -2.37125 | 2.96658  | -0.58341 |
| H | -1.28981 | 3.98119  | -1.59699 |
| C | -5.69137 | 3.64864  | 1.73333  |
| H | -6.72907 | 3.94215  | 1.94959  |
| H | -5.36825 | 2.89256  | 2.46265  |
| H | -5.03559 | 4.52366  | 1.81503  |
| C | -4.49887 | 2.99042  | -3.07427 |
| H | -4.01517 | 3.97330  | -3.12816 |
| H | -3.76540 | 2.20563  | -3.30843 |
| H | -5.31743 | 2.94979  | -3.80687 |
| C | -7.00294 | 0.97726  | 0.67507  |
| H | -7.29817 | 1.12870  | 1.71425  |
| C | -6.24581 | 0.55945  | -2.08190 |
| C | -7.42899 | -0.13391 | -0.04446 |
| H | -5.95763 | 0.38906  | -3.12034 |
| H | -8.06972 | -0.87120 | 0.44383  |
| C | -7.05554 | -0.33972 | -1.39676 |
| H | -7.41792 | -1.23004 | -1.91517 |
| C | -1.31792 | 7.04158  | -0.53481 |
| H | -0.36305 | 6.51538  | -0.55929 |
| C | -1.37916 | 8.42869  | -0.46517 |
| C | -3.83418 | 8.46026  | -0.46736 |
| H | -0.45037 | 9.00208  | -0.43230 |
| H | -4.77865 | 9.00492  | -0.43757 |
| C | -2.61347 | 9.12442  | -0.43405 |
| H | -2.60227 | 10.21503 | -0.37820 |

**Et-teth10**

|   |          |         |         |
|---|----------|---------|---------|
| C | 8.27613  | 5.28919 | 3.14236 |
| C | 7.15073  | 4.72472 | 2.55918 |
| C | 6.13741  | 4.22266 | 3.40317 |
| C | 6.26408  | 4.29227 | 4.78943 |
| C | 7.40825  | 4.85768 | 5.39006 |
| C | 8.41318  | 5.34215 | 4.56090 |
| N | 9.64739  | 5.93113 | 4.84968 |
| N | 9.43132  | 5.85001 | 2.54874 |
| C | 10.09125 | 5.23470 | 1.39399 |
| C | 10.49406 | 5.83608 | 6.02832 |
| C | 10.31766 | 6.07888 | 3.62543 |
| H | 7.05471  | 4.65416 | 1.47362 |
| H | 5.24876  | 3.76963 | 2.95747 |
| H | 5.46946  | 3.89857 | 5.42755 |
| H | 7.50789  | 4.89692 | 6.47690 |
| C | 11.47068 | 5.88640 | 1.10724 |
| N | 12.31620 | 5.94217 | 2.28899 |
| C | 13.54805 | 5.34246 | 2.56450 |
| C | 13.68391 | 5.25638 | 3.98159 |
| C | 14.80727 | 4.67579 | 4.55271 |

|   |          |         |         |
|---|----------|---------|---------|
| C | 15.81957 | 4.18983 | 3.69816 |
| C | 15.69404 | 4.29143 | 2.31378 |
| C | 14.55228 | 4.87416 | 1.72518 |
| H | 14.45432 | 4.94037 | 0.63951 |
| H | 16.48794 | 3.90968 | 1.66758 |
| H | 16.70651 | 3.72411 | 4.13409 |
| H | 14.90231 | 4.58019 | 5.63646 |
| N | 12.53075 | 5.80842 | 4.58685 |
| C | 11.86296 | 5.17088 | 5.72456 |
| C | 11.64754 | 6.07023 | 3.51562 |
| H | 12.49823 | 5.25848 | 6.61885 |
| H | 11.70233 | 4.09441 | 5.51174 |
| H | 9.97862  | 5.24510 | 6.79952 |
| H | 10.67279 | 6.84512 | 6.43959 |
| H | 11.97830 | 5.30443 | 0.32405 |
| H | 11.30848 | 6.90689 | 0.71783 |
| H | 9.45761  | 5.35636 | 0.50241 |
| H | 10.23526 | 4.15038 | 1.57605 |

**Et-teth10<sup>rad</sup> (isomer 1)**

|   |          |         |         |
|---|----------|---------|---------|
| C | 8.14636  | 5.07003 | 3.14910 |
| C | 6.88615  | 5.03071 | 2.56334 |
| C | 5.77582  | 5.03041 | 3.41886 |
| C | 5.92585  | 5.06749 | 4.81242 |
| C | 7.19255  | 5.09887 | 5.41242 |
| C | 8.30029  | 5.09299 | 4.57188 |
| N | 9.68028  | 5.08776 | 4.84087 |
| N | 9.43456  | 5.11476 | 2.58891 |
| C | 9.98946  | 4.83878 | 1.25861 |
| C | 10.51045 | 5.33884 | 6.02435 |
| C | 10.30461 | 5.11046 | 3.63368 |
| H | 6.76289  | 5.00374 | 1.47933 |
| H | 4.77390  | 5.00197 | 2.98604 |
| H | 5.03796  | 5.07000 | 5.44736 |
| H | 7.30363  | 5.12387 | 6.49790 |
| C | 11.45014 | 5.38268 | 1.09969 |
| N | 12.27907 | 5.10786 | 2.27871 |
| C | 13.65901 | 5.09983 | 2.54733 |
| C | 13.81307 | 5.04910 | 3.96937 |
| C | 15.07327 | 4.99340 | 4.55389 |
| C | 16.18338 | 5.00326 | 3.69813 |
| C | 16.03322 | 5.06578 | 2.30551 |
| C | 14.76654 | 5.11457 | 1.70663 |
| H | 14.65527 | 5.16008 | 0.62184 |
| H | 16.92095 | 5.07510 | 1.67043 |
| H | 17.18523 | 4.96204 | 4.13007 |
| H | 15.19669 | 4.94561 | 5.63715 |
| N | 12.52517 | 5.08887 | 4.53055 |
| C | 11.96904 | 4.79226 | 5.85594 |
| C | 11.65494 | 5.10926 | 3.48615 |
| H | 12.59531 | 5.25838 | 6.62922 |
| H | 11.98598 | 3.70050 | 6.01916 |
| H | 10.06243 | 4.84518 | 6.89788 |
| H | 10.53654 | 6.42407 | 6.22412 |
| H | 11.89646 | 4.90242 | 0.21782 |
| H | 11.42840 | 6.47130 | 0.91871 |

|   |         |         |         |
|---|---------|---------|---------|
| H | 9.36490 | 5.32018 | 0.49341 |
| H | 9.96846 | 3.75002 | 1.07684 |

Et-teth10<sup>rad</sup> (isomer 2)

|   |          |         |          |
|---|----------|---------|----------|
| C | 7.45370  | 5.16960 | 3.56169  |
| C | 6.16277  | 4.83317 | 3.16866  |
| C | 5.30054  | 4.32803 | 4.15123  |
| C | 5.71758  | 4.17172 | 5.48095  |
| C | 7.01478  | 4.51538 | 5.88548  |
| C | 7.87776  | 5.00973 | 4.91360  |
| N | 9.22423  | 5.41714 | 4.98922  |
| N | 8.54683  | 5.67337 | 2.82899  |
| C | 8.88415  | 5.50155 | 1.40707  |
| C | 10.29222 | 4.96210 | 5.89156  |
| C | 9.59403  | 5.72421 | 3.70831  |
| H | 5.83288  | 4.94765 | 2.13482  |
| H | 4.28520  | 4.04177 | 3.86991  |
| H | 5.02038  | 3.76896 | 6.21782  |
| H | 7.33897  | 4.38168 | 6.91894  |
| C | 10.24125 | 6.16742 | 1.03085  |
| N | 11.28604 | 5.86339 | 2.01049  |
| C | 12.68993 | 5.90084 | 2.01244  |
| C | 13.11169 | 5.75449 | 3.37049  |
| C | 14.46016 | 5.75383 | 3.71108  |
| C | 15.38636 | 5.88725 | 2.66908  |
| C | 14.97350 | 6.01945 | 1.33487  |
| C | 13.61694 | 6.03057 | 0.98377  |
| H | 13.30182 | 6.14423 | -0.05485 |
| H | 15.72484 | 6.12345 | 0.55000  |
| H | 16.45247 | 5.89168 | 2.90487  |
| H | 14.78607 | 5.65520 | 4.74780  |
| N | 11.95289 | 5.62437 | 4.15014  |
| C | 11.66374 | 5.63132 | 5.58404  |
| C | 10.89658 | 5.73978 | 3.30498  |
| H | 11.67594 | 6.67114 | 5.95366  |
| H | 12.44183 | 5.07201 | 6.12184  |
| H | 10.38607 | 3.86497 | 5.80326  |
| H | 10.02321 | 5.20320 | 6.92999  |
| H | 10.54302 | 5.79322 | 0.04262  |
| H | 10.11880 | 7.26212 | 0.96143  |
| H | 8.10189  | 5.95774 | 0.78412  |
| H | 8.91569  | 4.42179 | 1.17741  |

Et-teth10<sup>biscat</sup> (isomer 1)

|   |          |         |         |
|---|----------|---------|---------|
| C | 8.14823  | 5.05591 | 3.14845 |
| C | 6.88657  | 5.00995 | 2.55236 |
| C | 5.79099  | 5.02256 | 3.41236 |
| C | 5.94273  | 5.07696 | 4.81809 |
| C | 7.19625  | 5.11951 | 5.42425 |
| C | 8.30239  | 5.10538 | 4.57217 |
| N | 9.68251  | 5.12118 | 4.82389 |
| N | 9.44091  | 5.07391 | 2.60514 |
| C | 9.98886  | 4.84801 | 1.24637 |
| C | 10.51140 | 5.33280 | 6.03457 |
| C | 10.28454 | 5.10644 | 3.63572 |
| H | 6.75819  | 4.96550 | 1.46964 |

|   |          |         |         |
|---|----------|---------|---------|
| H | 4.78492  | 4.98927 | 2.98869 |
| H | 5.04938  | 5.08504 | 5.44593 |
| H | 7.30298  | 5.16170 | 6.50952 |
| C | 11.44917 | 5.37571 | 1.08925 |
| N | 12.27704 | 5.13893 | 2.29592 |
| C | 13.65703 | 5.11068 | 2.54708 |
| C | 13.81108 | 5.03451 | 3.96963 |
| C | 15.07262 | 4.97237 | 4.56459 |
| C | 16.16814 | 4.99467 | 3.70474 |
| C | 16.01651 | 5.07368 | 2.30020 |
| C | 14.76313 | 5.13326 | 1.69516 |
| H | 14.65648 | 5.19505 | 0.61082 |
| H | 16.90980 | 5.08783 | 1.67240 |
| H | 17.17406 | 4.94916 | 4.12763 |
| H | 15.20088 | 4.90800 | 5.64632 |
| N | 12.51855 | 5.04843 | 4.51333 |
| C | 11.96965 | 4.80202 | 5.86827 |
| C | 11.67500 | 5.10457 | 3.48372 |
| H | 12.60387 | 5.30845 | 6.60801 |
| H | 12.02424 | 3.71807 | 6.05864 |
| H | 10.04897 | 4.80568 | 6.87979 |
| H | 10.50488 | 6.41101 | 6.26070 |
| H | 11.90938 | 4.86178 | 0.23473 |
| H | 11.46019 | 6.45776 | 0.88241 |
| H | 9.35676  | 5.36912 | 0.51510 |
| H | 9.92995  | 3.76759 | 1.03805 |

Et-teth10<sup>biscat</sup> (isomer 2)

|   |          |         |          |
|---|----------|---------|----------|
| C | 7.45752  | 5.05303 | 3.54596  |
| C | 6.11936  | 4.90688 | 3.17562  |
| C | 5.21998  | 4.61366 | 4.19728  |
| C | 5.63650  | 4.46939 | 5.54191  |
| C | 6.96964  | 4.60724 | 5.92187  |
| C | 7.88104  | 4.89800 | 4.90496  |
| N | 9.27092  | 5.08856 | 4.91463  |
| N | 8.60846  | 5.33617 | 2.79821  |
| C | 8.89487  | 5.33875 | 1.34483  |
| C | 10.32796 | 4.79408 | 5.91115  |
| C | 9.63025  | 5.32716 | 3.65377  |
| H | 5.78925  | 5.01374 | 2.14117  |
| H | 4.16301  | 4.48708 | 3.95335  |
| H | 4.88973  | 4.23751 | 6.30378  |
| H | 7.28126  | 4.48519 | 6.96048  |
| C | 10.26684 | 5.99001 | 0.99489  |
| N | 11.32400 | 5.69507 | 1.99115  |
| C | 12.71397 | 5.88512 | 2.00072  |
| C | 13.13752 | 5.73000 | 3.35969  |
| C | 14.47576 | 5.87552 | 3.72993  |
| C | 15.37521 | 6.16823 | 2.70817  |
| C | 14.95866 | 6.31257 | 1.36357  |
| C | 13.62541 | 6.17535 | 0.98372  |
| H | 13.31377 | 6.29745 | -0.05488 |
| H | 15.70550 | 6.54400 | 0.60163  |
| H | 16.43226 | 6.29430 | 2.95199  |
| H | 14.80587 | 5.76857 | 4.76438  |
| N | 11.98651 | 5.44725 | 4.10756  |

|   |          |         |         |
|---|----------|---------|---------|
| C | 11.70022 | 5.44474 | 5.56094 |
| C | 10.96468 | 5.45669 | 3.25206 |
| H | 11.74543 | 6.48985 | 5.90632 |
| H | 12.48528 | 4.88058 | 6.08236 |
| H | 10.41874 | 3.69807 | 5.97775 |
| H | 10.01138 | 5.17131 | 6.89319 |
| H | 10.58341 | 5.61357 | 0.01254 |
| H | 10.17575 | 7.08603 | 0.92910 |
| H | 8.10960  | 5.90256 | 0.82331 |
| H | 8.85017  | 4.29361 | 0.99950 |

**Pr-teth10**

|   |          |         |          |
|---|----------|---------|----------|
| C | 8.05397  | 4.74728 | 3.21961  |
| C | 6.78137  | 4.71701 | 2.65619  |
| C | 5.66961  | 4.66787 | 3.51857  |
| C | 5.83923  | 4.66146 | 4.90162  |
| C | 7.12660  | 4.70288 | 5.47067  |
| C | 8.22632  | 4.73666 | 4.61767  |
| N | 9.59460  | 4.79921 | 4.89012  |
| N | 9.31412  | 4.82261 | 2.62601  |
| C | 9.43510  | 5.33066 | 1.27751  |
| C | 10.60124 | 4.76386 | 0.48998  |
| C | 10.03136 | 5.29609 | 6.17685  |
| C | 10.30856 | 4.90998 | 3.65184  |
| H | 6.63357  | 4.74176 | 1.57539  |
| H | 4.66514  | 4.64347 | 3.08949  |
| H | 4.96733  | 4.63268 | 5.55891  |
| H | 7.24575  | 4.71626 | 6.55516  |
| H | 8.50189  | 5.07009 | 0.76204  |
| H | 9.50924  | 6.44092 | 1.28017  |
| H | 10.59052 | 3.66216 | 0.53233  |
| H | 10.47128 | 5.06563 | -0.56338 |
| H | 10.06330 | 6.40840 | 6.17987  |
| H | 9.26605  | 4.99615 | 6.90413  |
| C | 11.94365 | 5.29617 | 0.95389  |
| N | 12.38041 | 4.79921 | 2.24059  |
| C | 13.74869 | 4.73664 | 2.51303  |
| C | 13.92104 | 4.74729 | 3.91110  |
| C | 15.19365 | 4.71701 | 4.47452  |
| C | 16.30540 | 4.66785 | 3.61214  |
| C | 16.13578 | 4.66142 | 2.22909  |
| C | 14.84840 | 4.70283 | 1.66004  |
| H | 14.72925 | 4.71618 | 0.57554  |
| H | 17.00768 | 4.63262 | 1.57179  |
| H | 17.30987 | 4.64346 | 4.04121  |
| H | 15.34145 | 4.74178 | 5.55532  |
| N | 12.66090 | 4.82263 | 4.50470  |
| C | 12.53990 | 5.33070 | 5.85319  |
| C | 11.37380 | 4.76382 | 6.64072  |
| C | 11.66646 | 4.90998 | 3.47887  |
| H | 11.38458 | 3.66212 | 6.59834  |
| H | 11.50375 | 5.06557 | 7.69409  |
| H | 13.47313 | 5.07019 | 6.36866  |
| H | 12.46568 | 6.44095 | 5.85052  |
| H | 11.91164 | 6.40848 | 0.95096  |
| H | 12.70897 | 4.99633 | 0.22659  |

**Pr-teth10<sup>rad</sup> (isomer 1)**

|   |          |          |          |
|---|----------|----------|----------|
| N | -3.73123 | 0.38448  | 11.03958 |
| N | -0.93783 | 1.68834  | 11.27682 |
| C | -3.27905 | 1.17947  | 12.08730 |
| C | -1.95856 | 1.65686  | 12.23219 |
| N | -4.36690 | 1.35322  | 12.94680 |
| N | -1.40707 | 2.15399  | 13.40949 |
| C | -5.45453 | 0.63043  | 12.45801 |
| C | -0.05994 | 2.43742  | 13.21858 |
| C | -5.05716 | 0.02570  | 11.25418 |
| C | 0.23531  | 2.13897  | 11.87848 |
| C | -4.54106 | 2.12347  | 14.17710 |
| C | -3.40282 | 3.05000  | 14.54511 |
| C | -2.07792 | 2.31399  | 14.68719 |
| C | -0.89473 | 1.35767  | 9.85311  |
| C | -2.21692 | 1.01029  | 9.20378  |
| C | -2.94448 | -0.11488 | 9.92755  |
| H | -4.70458 | 1.40423  | 14.99994 |
| H | -5.47340 | 2.70067  | 14.07056 |
| H | -3.66775 | 3.51309  | 15.50779 |
| H | -3.29244 | 3.87125  | 13.81874 |
| H | -1.39636 | 2.88576  | 15.32698 |
| H | -2.22438 | 1.33004  | 15.17007 |
| H | -0.20106 | 0.50586  | 9.73363  |
| H | -0.43539 | 2.21410  | 9.33400  |
| H | -1.98768 | 0.69262  | 8.17486  |
| H | -2.87883 | 1.88786  | 9.12915  |
| H | -3.64567 | -0.61335 | 9.24833  |
| H | -2.23328 | -0.88508 | 10.27930 |
| C | -6.74174 | 0.45673  | 12.97109 |
| C | -7.61799 | -0.34980 | 12.23597 |
| C | -7.22013 | -0.95556 | 11.03373 |
| C | -5.93129 | -0.77728 | 10.52015 |
| H | -7.06063 | 0.91611  | 13.90679 |
| H | -8.62892 | -0.51838 | 12.61269 |
| H | -7.92812 | -1.58199 | 10.48789 |
| H | -5.63219 | -1.25800 | 9.58824  |
| C | 0.92305  | 2.90676  | 14.09046 |
| C | 2.21133  | 3.07564  | 13.57127 |
| C | 2.50451  | 2.78296  | 12.23008 |
| C | 1.51937  | 2.30761  | 11.35728 |
| H | 3.52070  | 2.92679  | 11.85752 |
| H | 1.75972  | 2.07001  | 10.32093 |
| H | 0.71069  | 3.13185  | 15.13611 |
| H | 3.00421  | 3.43954  | 14.22711 |

**Pr-teth10<sup>rad</sup> (isomer 2)**

|   |         |         |         |
|---|---------|---------|---------|
| C | 8.08002 | 5.05135 | 3.22769 |
| C | 6.81424 | 5.07528 | 2.63918 |
| C | 5.71284 | 5.14789 | 3.49831 |
| C | 5.87854 | 5.19046 | 4.89129 |
| C | 7.14960 | 5.17395 | 5.47593 |
| C | 8.24987 | 5.12163 | 4.61709 |
| N | 9.62064 | 5.09059 | 4.87179 |
| N | 9.34197 | 4.92573 | 2.65649 |

|   |          |         |          |   |          |         |          |
|---|----------|---------|----------|---|----------|---------|----------|
| C | 9.41368  | 4.66801 | 1.22053  | H | 11.18769 | 3.18277 | 1.13910  |
| C | 10.73919 | 4.15334 | 0.71290  | H | 10.69935 | 3.95587 | -0.36688 |
| C | 10.06766 | 4.91381 | 6.24957  | H | 10.65427 | 6.24623 | 6.30090  |
| C | 10.31667 | 4.96690 | 3.66046  | H | 9.35304  | 5.18517 | 6.86194  |
| H | 6.67594  | 5.03810 | 1.55859  | C | 11.78045 | 5.25313 | 0.96607  |
| H | 4.70728  | 5.16805 | 3.07348  | N | 12.36249 | 5.16055 | 2.31032  |
| H | 4.99872  | 5.23575 | 5.53580  | C | 13.73073 | 5.21342 | 2.53825  |
| H | 7.25868  | 5.19637 | 6.56029  | C | 13.91441 | 5.00469 | 3.91694  |
| H | 8.62101  | 3.93826 | 0.99357  | C | 15.18883 | 4.99573 | 4.50159  |
| H | 9.15288  | 5.59879 | 0.68543  | C | 16.26197 | 5.19723 | 3.64234  |
| H | 11.00689 | 3.18801 | 1.17321  | C | 16.07837 | 5.39829 | 2.25165  |
| H | 10.62080 | 3.97035 | -0.36601 | C | 14.81592 | 5.41161 | 1.67269  |
| H | 9.33383  | 5.43511 | 6.87619  | H | 14.69176 | 5.58333 | 0.60313  |
| H | 10.01034 | 3.84002 | 6.51175  | H | 16.95472 | 5.55408 | 1.61940  |
| C | 11.85774 | 5.15682 | 0.92336  | H | 17.27532 | 5.20405 | 4.04978  |
| N | 12.40286 | 5.09972 | 2.26817  | H | 15.34581 | 4.83981 | 5.56890  |
| C | 13.77360 | 5.15307 | 2.50277  | N | 12.65362 | 4.81438 | 4.47325  |
| C | 13.96110 | 5.06535 | 3.89147  | C | 12.56750 | 4.43682 | 5.90071  |
| C | 15.24046 | 5.06456 | 4.45139  | C | 11.18112 | 4.12178 | 6.41371  |
| C | 16.32536 | 5.16484 | 3.57554  | C | 11.71400 | 4.92922 | 3.48746  |
| C | 16.13658 | 5.26205 | 2.18777  | H | 10.78735 | 3.18276 | 5.99159  |
| C | 14.85609 | 5.25972 | 1.62719  | H | 11.27567 | 3.95585 | 7.49759  |
| H | 14.72233 | 5.34690 | 0.54854  | H | 13.23283 | 3.57057 | 6.03378  |
| H | 17.00470 | 5.34527 | 1.53143  | H | 13.00186 | 5.27444 | 6.46843  |
| H | 17.33787 | 5.16820 | 3.98393  | H | 11.32071 | 6.24625 | 0.82983  |
| H | 15.40632 | 4.98365 | 5.52606  | H | 12.62196 | 5.18522 | 0.26878  |
| N | 12.69797 | 4.97649 | 4.47487  |   |          |         |          |
| C | 12.54964 | 4.66137 | 5.88598  |   |          |         |          |
| C | 11.44847 | 5.44102 | 6.57156  |   |          |         |          |
| C | 11.72017 | 4.99854 | 3.48008  |   |          |         |          |
| H | 11.58422 | 5.33119 | 7.65900  |   |          |         |          |
| H | 11.53484 | 6.51466 | 6.33699  |   |          |         |          |
| H | 12.38625 | 3.57438 | 6.01408  |   |          |         |          |
| H | 13.51055 | 4.90303 | 6.35441  |   |          |         |          |
| H | 11.51326 | 6.18104 | 0.68766  |   |          |         |          |
| H | 12.68904 | 4.93179 | 0.24526  |   |          |         |          |

Pr-teth10<sup>biscat</sup> (isomer 1)

|   |          |         |         |
|---|----------|---------|---------|
| C | 8.06061  | 5.00470 | 3.21377 |
| C | 6.78618  | 4.99574 | 2.62912 |
| C | 5.71304  | 5.19724 | 3.48835 |
| C | 5.89664  | 5.39830 | 4.87904 |
| C | 7.15908  | 5.41162 | 5.45801 |
| C | 8.24427  | 5.21343 | 4.59246 |
| N | 9.61251  | 5.16055 | 4.82040 |
| N | 9.32139  | 4.81438 | 2.65747 |
| C | 9.40752  | 4.43680 | 1.23002 |
| C | 10.79390 | 4.12178 | 0.71700 |
| C | 10.19455 | 5.25311 | 6.16466 |
| C | 10.26101 | 4.92922 | 3.64326 |
| H | 6.62922  | 4.83982 | 1.56180 |
| H | 4.69969  | 5.20406 | 3.08090 |
| H | 5.02028  | 5.55409 | 5.51129 |
| H | 7.28323  | 5.58334 | 6.52757 |
| H | 8.74220  | 3.57052 | 1.09697 |
| H | 8.97312  | 5.27439 | 0.66229 |

Pr-teth10<sup>biscat</sup> (isomer 2)

|   |          |         |          |
|---|----------|---------|----------|
| C | 8.08714  | 4.87922 | 3.24025  |
| C | 6.81243  | 4.78377 | 2.66381  |
| C | 5.73367  | 4.87215 | 3.53543  |
| C | 5.91311  | 5.04523 | 4.92988  |
| C | 7.17672  | 5.14975 | 5.49972  |
| C | 8.26522  | 5.06970 | 4.61955  |
| N | 9.63596  | 5.14673 | 4.84588  |
| N | 9.35444  | 4.81446 | 2.67259  |
| C | 9.44843  | 4.55374 | 1.21754  |
| C | 10.83406 | 4.34296 | 0.64693  |
| C | 10.09212 | 5.41590 | 6.23142  |
| C | 10.28989 | 4.98170 | 3.65563  |
| H | 6.65799  | 4.64557 | 1.59373  |
| H | 4.72001  | 4.80401 | 3.13462  |
| H | 5.03278  | 5.09992 | 5.57344  |
| H | 7.29804  | 5.28651 | 6.57419  |
| H | 8.82169  | 3.67117 | 1.02273  |
| H | 8.96580  | 5.41359 | 0.72640  |
| H | 11.26878 | 3.38028 | 0.96114  |
| H | 10.71368 | 4.28649 | -0.44562 |
| H | 9.54914  | 6.31222 | 6.56556  |
| H | 9.72596  | 4.56868 | 6.83216  |
| C | 11.79548 | 5.47314 | 0.98632  |
| N | 12.39243 | 5.25551 | 2.30813  |
| C | 13.76204 | 5.18454 | 2.52912  |
| C | 13.93580 | 4.86266 | 3.89183  |
| C | 15.21180 | 4.73406 | 4.46066  |
| C | 16.29169 | 4.92778 | 3.60955  |



|   |          |         |         |
|---|----------|---------|---------|
| C | 16.11650 | 5.23768 | 2.23750 |
| C | 14.85540 | 5.37199 | 1.67189 |
| H | 14.73805 | 5.62838 | 0.61848 |
| H | 16.99875 | 5.38280 | 1.61088 |
| H | 17.30457 | 4.83814 | 4.00819 |
| H | 15.36570 | 4.48574 | 5.51133 |
| N | 12.66272 | 4.73106 | 4.43144 |
| C | 12.39954 | 4.46017 | 5.84686 |
| C | 11.58036 | 5.59323 | 6.44952 |
| C | 11.73696 | 4.98436 | 3.46842 |
| H | 11.73536 | 5.61792 | 7.53890 |
| H | 11.94549 | 6.55827 | 6.06273 |
| H | 11.89654 | 3.48401 | 5.94350 |
| H | 13.37561 | 4.37146 | 6.33511 |
| H | 11.30675 | 6.46112 | 0.95999 |
| H | 12.62614 | 5.50364 | 0.27370 |

**11**

|   |          |          |          |
|---|----------|----------|----------|
| C | -2.02948 | -4.26742 | -0.53168 |
| C | -3.08575 | -3.92442 | 0.22581  |
| N | -1.27907 | -3.20225 | -1.05902 |
| C | -1.69088 | -1.97326 | -0.46533 |
| S | -3.29873 | -2.16214 | 0.33957  |
| C | -0.82883 | -0.93150 | -0.36452 |
| N | -1.07781 | 0.37930  | 0.05909  |
| C | 0.05880  | 1.17284  | 0.09982  |
| C | 1.18975  | 0.58095  | -0.33006 |
| S | 0.89719  | -1.09546 | -0.81474 |
| C | -2.41304 | 0.89379  | 0.27970  |
| H | -2.40619 | 1.98703  | 0.15700  |
| H | -3.10084 | 0.46907  | -0.46775 |
| H | -2.80334 | 0.65074  | 1.28195  |
| C | -1.04079 | -3.22173 | -2.50295 |
| H | -1.96060 | -3.00319 | -3.07867 |
| H | -0.27471 | -2.48052 | -2.77095 |
| H | -0.66374 | -4.21453 | -2.79378 |
| H | -0.03668 | 2.19875  | 0.45541  |
| H | 2.18026  | 1.02168  | -0.40647 |
| H | -1.72932 | -5.28614 | -0.78573 |
| H | -3.77820 | -4.59483 | 0.73169  |

**11<sup>rad</sup>**

|   |          |          |          |
|---|----------|----------|----------|
| C | -2.35060 | -4.20939 | -0.74728 |
| C | -3.15698 | -3.90270 | 0.29557  |
| N | -1.51290 | -3.18317 | -1.14391 |
| C | -1.63143 | -2.04106 | -0.37598 |
| S | -2.86494 | -2.28154 | 0.86050  |
| C | -0.80494 | -0.90800 | -0.45939 |
| N | -1.11541 | 0.35214  | 0.01486  |
| C | -0.05832 | 1.24241  | -0.03766 |
| C | 1.07454  | 0.73271  | -0.57344 |
| S | 0.86611  | -0.93810 | -1.01808 |
| C | -2.45985 | 0.78485  | 0.39833  |
| H | -2.52294 | 1.87360  | 0.27773  |
| H | -3.20116 | 0.31615  | -0.26147 |
| H | -2.68664 | 0.52853  | 1.44463  |

|   |          |          |          |
|---|----------|----------|----------|
| C | -0.72193 | -3.27745 | -2.37138 |
| H | -0.80419 | -2.33970 | -2.93794 |
| H | 0.33683  | -3.48690 | -2.15588 |
| H | -1.12687 | -4.09160 | -2.98492 |
| H | 2.01849  | 1.24381  | -0.75208 |
| H | -0.20591 | 2.26122  | 0.31857  |
| H | -2.32730 | -5.15094 | -1.29397 |
| H | -3.91563 | -4.52807 | 0.76158  |

**11<sup>biscat</sup>**

|   |          |          |          |
|---|----------|----------|----------|
| C | -2.22797 | -4.26434 | -0.69360 |
| C | -2.82720 | -4.09887 | 0.52421  |
| N | -1.39894 | -3.21484 | -1.02846 |
| C | -1.35837 | -2.24203 | -0.09741 |
| S | -2.34985 | -2.61555 | 1.24887  |
| C | -0.55891 | -1.01411 | -0.16730 |
| N | -0.78759 | 0.02217  | -0.99671 |
| C | 0.07644  | 1.07961  | -0.80947 |
| C | 0.98045  | 0.85532  | 0.19203  |
| S | 0.74913  | -0.69676 | 0.89265  |
| C | -1.85420 | 0.06020  | -2.01780 |
| H | -1.42531 | -0.18255 | -3.00135 |
| H | -2.64212 | -0.65413 | -1.75302 |
| H | -2.28322 | 1.07033  | -2.04433 |
| C | -0.63496 | -3.20491 | -2.29323 |
| H | 0.16246  | -2.45557 | -2.23550 |
| H | -0.18399 | -4.19544 | -2.44068 |
| H | -1.31634 | -2.98238 | -3.12716 |
| H | -3.52309 | -4.77608 | 1.02481  |
| H | -2.34082 | -5.11007 | -1.37410 |
| H | 1.76298  | 1.52799  | 0.55005  |
| H | -0.01834 | 1.97608  | -1.42430 |

**12**

|   |         |         |          |
|---|---------|---------|----------|
| S | 4.98156 | 5.03104 | 11.62484 |
| S | 2.14754 | 6.16659 | 8.36422  |
| N | 2.37987 | 5.39360 | 11.70449 |
| N | 4.73290 | 5.81078 | 8.78169  |
| C | 3.44723 | 5.45912 | 10.80408 |
| C | 3.49938 | 5.80914 | 9.49409  |
| C | 2.81508 | 5.53124 | 13.08709 |
| C | 4.53171 | 5.48537 | 7.36343  |
| C | 4.11484 | 4.75084 | 13.21761 |
| C | 3.05046 | 5.15700 | 7.12642  |
| C | 1.08998 | 5.98072 | 11.40167 |
| C | 5.58720 | 6.97471 | 8.98437  |
| H | 0.36154 | 5.64368 | 12.15424 |
| H | 0.73770 | 5.65062 | 10.41865 |
| H | 1.11283 | 7.09171 | 11.41474 |
| H | 5.13406 | 7.90558 | 8.58199  |
| H | 6.55462 | 6.81046 | 8.48248  |
| H | 5.78970 | 7.11385 | 10.05558 |
| H | 4.74196 | 5.11781 | 14.04182 |
| H | 3.92853 | 3.67442 | 13.35323 |
| H | 2.03892 | 5.13038 | 13.75921 |
| H | 2.97731 | 6.59814 | 13.35709 |

|   |         |         |         |
|---|---------|---------|---------|
| H | 5.16380 | 4.63407 | 7.05284 |
| H | 4.81627 | 6.35141 | 6.73824 |
| H | 2.72019 | 5.43429 | 6.11515 |
| H | 2.83212 | 4.09205 | 7.29870 |

|   |         |         |         |
|---|---------|---------|---------|
| H | 5.05234 | 6.38222 | 6.93912 |
| H | 3.26997 | 6.47231 | 6.97394 |
| H | 3.44041 | 4.08761 | 6.62033 |
| H | 5.06945 | 3.98921 | 7.36196 |

**12<sup>rad</sup>**

|   |         |         |          |
|---|---------|---------|----------|
| S | 5.04616 | 5.10317 | 11.75708 |
| S | 2.14924 | 4.91097 | 8.57484  |
| N | 2.48181 | 5.56143 | 11.70827 |
| N | 4.52933 | 5.96009 | 8.65997  |
| C | 3.55968 | 5.49664 | 10.88805 |
| C | 3.52138 | 5.56388 | 9.47417  |
| C | 2.73225 | 5.07569 | 13.07241 |
| C | 4.36138 | 5.56111 | 7.25637  |
| C | 4.20234 | 5.35243 | 13.36971 |
| C | 2.86145 | 5.51507 | 6.99431  |
| C | 1.15830 | 6.06414 | 11.35713 |
| C | 5.74612 | 6.66118 | 9.04698  |
| H | 0.75078 | 6.61131 | 12.21962 |
| H | 0.46336 | 5.24811 | 11.09907 |
| H | 1.22683 | 6.74935 | 10.50487 |
| H | 5.96930 | 7.42760 | 8.29018  |
| H | 6.60435 | 5.97098 | 9.10828  |
| H | 5.61451 | 7.15171 | 10.01752 |
| H | 4.37931 | 6.38364 | 13.70874 |
| H | 4.62672 | 4.65090 | 14.09873 |
| H | 2.50563 | 3.99527 | 13.13192 |
| H | 2.07219 | 5.60274 | 13.77548 |
| H | 4.82848 | 4.57262 | 7.09348  |
| H | 4.86487 | 6.29061 | 6.60662  |
| H | 2.44059 | 6.50590 | 6.76753  |
| H | 2.59090 | 4.81208 | 6.19661  |

**13**

|   |          |          |          |
|---|----------|----------|----------|
| C | -2.17157 | -4.20374 | -0.70319 |
| C | -3.11894 | -3.84231 | 0.28213  |
| N | -1.56950 | -3.11194 | -1.32198 |
| C | -1.83562 | -1.89444 | -0.66243 |
| S | -3.26530 | -2.07889 | 0.42196  |
| C | -1.01540 | -0.81974 | -0.69634 |
| N | -1.25405 | 0.44811  | -0.14152 |
| C | -0.09716 | 1.18494  | 0.07987  |
| C | 1.05267  | 0.60716  | -0.50381 |
| S | 0.65543  | -0.89359 | -1.35590 |
| C | -2.57098 | 1.02047  | 0.04118  |
| H | -2.57304 | 2.06734  | -0.30823 |
| H | -3.29734 | 0.45703  | -0.55864 |
| H | -2.90242 | 1.00209  | 1.09369  |
| C | -1.12220 | -3.18659 | -2.70137 |
| H | -1.25573 | -2.20381 | -3.17520 |
| H | -0.06079 | -3.47446 | -2.79407 |
| H | -1.73099 | -3.92384 | -3.25150 |
| C | -3.84272 | -4.80971 | 0.97025  |
| H | -4.57812 | -4.51997 | 1.72423  |
| C | -1.94725 | -5.55203 | -0.99342 |
| C | -3.61033 | -6.16393 | 0.67809  |
| H | -1.20227 | -5.84132 | -1.73691 |
| H | -4.16563 | -6.93278 | 1.21943  |
| C | -2.67396 | -6.52619 | -0.29341 |
| H | -2.49124 | -7.58143 | -0.51174 |
| C | 2.29797  | 1.21326  | -0.39274 |
| H | 3.17665  | 0.75656  | -0.85391 |
| C | 2.40623  | 2.41313  | 0.32903  |
| C | 0.01283  | 2.38768  | 0.78405  |
| H | 3.38169  | 2.89125  | 0.44308  |
| H | -0.86184 | 2.83892  | 1.25460  |
| C | 1.27369  | 2.99043  | 0.90578  |
| H | 1.36645  | 3.92195  | 1.46917  |

**12<sup>biscat</sup>**

|   |         |         |          |
|---|---------|---------|----------|
| S | 2.20097 | 6.94153 | 11.53689 |
| S | 3.33406 | 3.99155 | 9.04953  |
| N | 3.97772 | 5.15558 | 12.13581 |
| N | 4.16842 | 6.43740 | 8.86577  |
| C | 3.43044 | 5.80620 | 11.13996 |
| C | 3.72549 | 5.53281 | 9.70223  |
| C | 3.33542 | 5.42616 | 13.45310 |
| C | 4.15210 | 6.00206 | 7.44215  |
| C | 2.61811 | 6.76973 | 13.33804 |
| C | 4.08424 | 4.47391 | 7.42169  |
| C | 5.03319 | 4.13788 | 12.08253 |
| C | 4.57703 | 7.81818 | 9.15575  |
| H | 4.61660 | 3.17831 | 12.42840 |
| H | 5.84505 | 4.43893 | 12.76086 |
| H | 5.42352 | 4.02890 | 11.06577 |
| H | 5.60081 | 7.96808 | 8.78090  |
| H | 4.54075 | 8.02073 | 10.23077 |
| H | 3.90168 | 8.50731 | 8.62505  |
| H | 4.10401 | 5.42960 | 14.23912 |
| H | 2.64168 | 4.58966 | 13.64936 |
| H | 1.68410 | 6.80857 | 13.91460 |
| H | 3.24987 | 7.62881 | 13.60670 |

**13<sup>rad</sup>**

|   |          |          |          |
|---|----------|----------|----------|
| C | -2.23994 | -4.26009 | -0.69844 |
| C | -3.08229 | -3.92578 | 0.38027  |
| N | -1.50440 | -3.16940 | -1.16820 |
| C | -1.66224 | -2.02224 | -0.42582 |
| S | -2.88080 | -2.24244 | 0.83211  |
| C | -0.84255 | -0.88540 | -0.50567 |
| N | -1.14566 | 0.35736  | 0.00247  |
| C | -0.05409 | 1.22583  | 0.07601  |
| C | 1.11740  | 0.67607  | -0.48149 |
| S | 0.83226  | -0.95634 | -1.05789 |
| C | -2.49865 | 0.82210  | 0.30111  |
| H | -2.60071 | 1.85782  | -0.05120 |
| H | -3.22765 | 0.20405  | -0.23401 |
| H | -2.71165 | 0.78623  | 1.38083  |

|                  |          |          |          |
|------------------|----------|----------|----------|
| C                | -0.79822 | -3.23990 | -2.44483 |
| H                | -0.71464 | -2.23653 | -2.87740 |
| H                | 0.20678  | -3.67487 | -2.33015 |
| H                | -1.38291 | -3.86460 | -3.13403 |
| C                | -3.93787 | -4.86456 | 0.95912  |
| H                | -4.59405 | -4.59183 | 1.78752  |
| C                | -2.22184 | -5.56816 | -1.19908 |
| C                | -3.91762 | -6.16517 | 0.45303  |
| H                | -1.56000 | -5.85323 | -2.01740 |
| H                | -4.56786 | -6.92309 | 0.89365  |
| C                | -3.06303 | -6.51060 | -0.60736 |
| H                | -3.05387 | -7.53672 | -0.98049 |
| C                | 2.31429  | 1.39213  | -0.52074 |
| H                | 3.21423  | 0.95658  | -0.95837 |
| C                | 2.32799  | 2.67375  | 0.03111  |
| C                | -0.03596 | 2.51760  | 0.61735  |
| H                | 3.25539  | 3.24949  | 0.03296  |
| H                | -0.92581 | 2.95773  | 1.06814  |
| C                | 1.16516  | 3.22630  | 0.59163  |
| H                | 1.20000  | 4.22754  | 1.02551  |
| <b>13</b> biscat |          |          |          |
| C                | -2.29161 | -4.24485 | -0.67556 |
| C                | -2.80092 | -4.11939 | 0.64004  |
| N                | -1.51222 | -3.14398 | -1.03840 |
| C                | -1.40724 | -2.21525 | -0.07659 |
| S                | -2.25114 | -2.63170 | 1.36332  |
| C                | -0.57031 | -1.01384 | -0.14423 |
| N                | -1.01834 | 0.24282  | -0.00645 |
| C                | -0.00623 | 1.20317  | 0.02922  |
| C                | 1.27920  | 0.61979  | -0.08597 |
| S                | 1.14592  | -1.11410 | -0.22769 |
| C                | -2.43568 | 0.63670  | 0.07179  |
| H                | -2.62353 | 1.42028  | -0.67403 |
| H                | -3.07680 | -0.22400 | -0.14042 |
| H                | -2.65067 | 1.02679  | 1.07717  |
| C                | -0.93597 | -3.03130 | -2.38957 |
| H                | -0.45291 | -2.05647 | -2.51062 |
| H                | -0.19809 | -3.83186 | -2.54053 |
| H                | -1.74530 | -3.13384 | -3.12571 |
| C                | -3.61946 | -5.10234 | 1.20735  |
| H                | -4.01268 | -5.00246 | 2.22066  |
| C                | -2.59808 | -5.37004 | -1.45853 |
| C                | -3.91565 | -6.21311 | 0.42396  |
| H                | -2.21376 | -5.48733 | -2.47236 |
| H                | -4.55178 | -7.00068 | 0.83398  |
| C                | -3.41025 | -6.34386 | -0.89035 |
| H                | -3.66647 | -7.23062 | -1.47376 |
| C                | 2.44181  | 1.39899  | -0.06540 |
| H                | 3.43269  | 0.94864  | -0.14694 |
| C                | 2.28193  | 2.77463  | 0.06727  |
| C                | -0.15628 | 2.59356  | 0.15631  |
| H                | 3.16656  | 3.41476  | 0.09226  |
| H                | -1.13627 | 3.06233  | 0.24940  |
| C                | 1.00057  | 3.36204  | 0.17309  |
| H                | 0.91817  | 4.44614  | 0.27755  |

**14**

|   |          |          |          |
|---|----------|----------|----------|
| C | -7.83965 | 1.80649  | 1.55149  |
| C | -6.61494 | 1.28571  | 1.97839  |
| C | -7.89104 | 2.82595  | 0.58210  |
| C | -5.45837 | 2.80091  | 0.51963  |
| C | -5.40297 | 1.77444  | 1.45953  |
| H | -4.44623 | 1.36320  | 1.78895  |
| H | -8.76875 | 1.41604  | 1.97448  |
| H | -6.59498 | 0.49130  | 2.72873  |
| C | -6.69461 | 3.32073  | 0.07823  |
| H | -8.84836 | 3.21426  | 0.22737  |
| N | -6.47166 | 4.27583  | -0.95736 |
| C | -5.04637 | 4.56098  | -0.85114 |
| N | -4.43255 | 3.44723  | -0.17476 |
| C | -7.03826 | 3.83383  | -2.23990 |
| H | -8.10561 | 3.61206  | -2.09823 |
| H | -6.54793 | 2.91479  | -2.61758 |
| H | -6.95279 | 4.62075  | -2.99280 |
| C | -3.30200 | 2.69237  | -0.68289 |
| H | -3.56428 | 1.62318  | -0.77923 |
| H | -2.41257 | 2.76342  | -0.02981 |
| H | -3.02247 | 3.07057  | -1.67650 |
| C | -4.44827 | 5.78088  | -0.92618 |
| N | -4.97237 | 6.92728  | -1.54917 |
| C | -4.15093 | 8.15190  | -1.30369 |
| C | -3.26770 | 7.68316  | -0.14056 |
| C | -3.11108 | 6.14856  | -0.25181 |
| H | -3.78227 | 7.91470  | 0.80490  |
| H | -2.29554 | 8.19755  | -0.11843 |
| C | -4.99013 | 9.36289  | -0.88296 |
| H | -5.57930 | 9.15997  | 0.02001  |
| H | -5.67051 | 9.67360  | -1.68788 |
| H | -4.31807 | 10.20801 | -0.66766 |
| C | -3.33536 | 8.58284  | -2.53700 |
| H | -2.77301 | 9.49983  | -2.30336 |
| H | -4.00430 | 8.80340  | -3.38166 |
| H | -2.61426 | 7.82294  | -2.85649 |
| C | -1.86244 | 5.78362  | -1.08171 |
| H | -1.93985 | 6.10537  | -2.12895 |
| H | -1.68507 | 4.70137  | -1.07753 |
| H | -0.97170 | 6.26721  | -0.64713 |
| C | -2.94458 | 5.57981  | 1.16967  |
| H | -2.16266 | 6.15374  | 1.69433  |
| H | -3.88061 | 5.66859  | 1.74061  |
| H | -2.64477 | 4.52560  | 1.17829  |
| C | -5.98645 | 6.91279  | -2.55998 |
| C | -7.31257 | 7.31573  | -2.24870 |
| C | -8.26887 | 7.35091  | -3.27326 |
| C | -7.95403 | 6.97528  | -4.57522 |
| C | -6.66379 | 6.54257  | -4.86761 |
| C | -5.66594 | 6.50114  | -3.88394 |
| H | -9.28608 | 7.67253  | -3.03785 |
| H | -8.71576 | 7.00995  | -5.35827 |
| H | -6.42440 | 6.21953  | -5.88310 |
| C | -7.78010 | 7.65983  | -0.83963 |
| C | -8.38443 | 9.07172  | -0.75426 |

|                         |          |          |          |                            |          |          |          |
|-------------------------|----------|----------|----------|----------------------------|----------|----------|----------|
| H                       | -7.71180 | 9.84142  | -1.15670 | C                          | -1.95601 | 6.12222  | 0.27082  |
| H                       | -8.61468 | 9.33024  | 0.29235  | H                          | -1.52122 | 6.16525  | -0.73650 |
| H                       | -9.32946 | 9.13316  | -1.31749 | H                          | -1.87122 | 5.09861  | 0.65786  |
| C                       | -8.79821 | 6.62930  | -0.32374 | H                          | -1.33382 | 6.75351  | 0.92219  |
| H                       | -6.90311 | 7.60125  | -0.18273 | C                          | -3.90163 | 6.45762  | 1.77994  |
| H                       | -9.69293 | 6.59349  | -0.96624 | H                          | -3.26286 | 7.02279  | 2.47712  |
| H                       | -9.13167 | 6.89685  | 0.69293  | H                          | -4.93495 | 6.81818  | 1.90079  |
| H                       | -8.34078 | 5.63266  | -0.29340 | H                          | -3.86418 | 5.39777  | 2.07782  |
| C                       | -4.30215 | 5.94818  | -4.28538 | C                          | -6.15137 | 6.86276  | -2.30635 |
| C                       | -4.35276 | 4.42680  | -4.50936 | C                          | -7.35813 | 7.59485  | -2.08614 |
| H                       | -4.59250 | 3.89691  | -3.57809 | C                          | -8.40025 | 7.45447  | -3.01226 |
| H                       | -3.37966 | 4.05792  | -4.87320 | C                          | -8.29491 | 6.61700  | -4.11771 |
| H                       | -5.11424 | 4.15680  | -5.25900 | C                          | -7.12456 | 5.89356  | -4.31044 |
| C                       | -3.73291 | 6.64684  | -5.53101 | C                          | -6.03855 | 5.99445  | -3.42802 |
| H                       | -3.61407 | 6.12305  | -3.45296 | H                          | -9.32367 | 8.01449  | -2.85664 |
| H                       | -4.33022 | 6.41746  | -6.42776 | H                          | -9.12331 | 6.52574  | -4.82400 |
| H                       | -2.70518 | 6.30088  | -5.72824 | H                          | -7.04271 | 5.23559  | -5.17715 |
| H                       | -3.71057 | 7.74099  | -5.41832 | C                          | -7.63206 | 8.52687  | -0.90238 |
|                         |          |          |          | C                          | -7.89471 | 9.97662  | -1.36599 |
| <b>14<sup>rad</sup></b> |          |          |          | H                          | -7.15239 | 10.34046 | -2.08441 |
| C                       | -6.91595 | 0.58432  | -0.12218 | H                          | -7.90243 | 10.65783 | -0.50047 |
| C                       | -5.58206 | 0.15569  | -0.26050 | H                          | -8.87965 | 10.05264 | -1.85207 |
| C                       | -7.25251 | 1.93984  | -0.12422 | C                          | -8.85550 | 8.09782  | -0.06515 |
| C                       | -4.87133 | 2.42135  | -0.40276 | H                          | -6.74819 | 8.51421  | -0.24680 |
| C                       | -4.53364 | 1.06722  | -0.40192 | H                          | -9.77342 | 8.12147  | -0.67141 |
| H                       | -3.50179 | 0.73018  | -0.50837 | H                          | -9.00216 | 8.80207  | 0.76812  |
| H                       | -7.70697 | -0.16005 | -0.01331 | H                          | -8.77096 | 7.09310  | 0.36699  |
| H                       | -5.36056 | -0.91357 | -0.25639 | C                          | -4.81964 | 5.13560  | -3.75835 |
| C                       | -6.20274 | 2.84852  | -0.27064 | C                          | -5.18300 | 3.63876  | -3.75644 |
| H                       | -8.28823 | 2.26793  | -0.02747 | H                          | -5.67821 | 3.32393  | -2.82891 |
| N                       | -6.18434 | 4.23862  | -0.33557 | H                          | -4.28366 | 3.01987  | -3.90229 |
| C                       | -4.90129 | 4.67893  | -0.53656 | H                          | -5.87232 | 3.39940  | -4.57988 |
| N                       | -4.09165 | 3.56287  | -0.58292 | C                          | -4.19765 | 5.50449  | -5.11618 |
| C                       | -7.32444 | 5.06343  | 0.00869  | H                          | -4.05617 | 5.30303  | -2.98960 |
| H                       | -7.86388 | 4.59523  | 0.84426  | H                          | -4.89585 | 5.29652  | -5.94154 |
| H                       | -8.00021 | 5.18296  | -0.84840 | H                          | -3.29063 | 4.90549  | -5.29408 |
| H                       | -6.96575 | 6.04682  | 0.32392  | H                          | -3.91884 | 6.56624  | -5.17376 |
| C                       | -2.75651 | 3.46694  | -1.15772 |                            |          |          |          |
| H                       | -2.76290 | 2.68507  | -1.93038 | <b>14<sup>biscat</sup></b> |          |          |          |
| H                       | -2.00941 | 3.20921  | -0.39548 | C                          | -6.67520 | 0.48816  | -0.12096 |
| H                       | -2.48611 | 4.41806  | -1.62272 | C                          | -5.34220 | 0.15980  | -0.46633 |
| C                       | -4.45297 | 6.03407  | -0.62592 | C                          | -7.10036 | 1.80718  | 0.00097  |
| N                       | -5.04967 | 7.02488  | -1.38405 | C                          | -4.81032 | 2.46576  | -0.58165 |
| C                       | -4.06199 | 8.17857  | -1.49037 | C                          | -4.38356 | 1.13847  | -0.70731 |
| C                       | -3.45698 | 8.13688  | -0.08547 | H                          | -3.35982 | 0.87569  | -0.97575 |
| C                       | -3.40261 | 6.64500  | 0.33084  | H                          | -7.38889 | -0.31860 | 0.05696  |
| H                       | -4.11558 | 8.69163  | 0.59988  | H                          | -5.05789 | -0.89203 | -0.54321 |
| H                       | -2.46827 | 8.61385  | -0.05040 | C                          | -6.13439 | 2.79219  | -0.23781 |
| C                       | -4.68459 | 9.52895  | -1.81067 | H                          | -8.12957 | 2.05102  | 0.26685  |
| H                       | -5.30909 | 9.90454  | -0.99430 | N                          | -6.20887 | 4.18368  | -0.22214 |
| H                       | -5.27540 | 9.49358  | -2.73611 | C                          | -5.00199 | 4.69103  | -0.54246 |
| H                       | -3.87300 | 10.25417 | -1.96837 | N                          | -4.13499 | 3.67155  | -0.76295 |
| C                       | -3.03337 | 7.85754  | -2.58572 | C                          | -7.42739 | 4.91896  | 0.09200  |
| H                       | -2.21745 | 8.59420  | -2.55682 | H                          | -7.93210 | 4.42610  | 0.93310  |
| H                       | -3.50215 | 7.91197  | -3.57746 | H                          | -8.08941 | 4.94411  | -0.78458 |
| H                       | -2.59276 | 6.85951  | -2.46790 | H                          | -7.17152 | 5.93772  | 0.38376  |

|   |          |          |          |           |          |         |          |
|---|----------|----------|----------|-----------|----------|---------|----------|
| C | -2.76751 | 3.71851  | -1.28078 |           |          |         |          |
| H | -2.71552 | 3.09498  | -2.18314 | <b>18</b> |          |         |          |
| H | -2.06638 | 3.33411  | -0.52858 | C         | -2.70985 | 1.50856 | 0.36447  |
| H | -2.49566 | 4.74122  | -1.54739 | N         | -4.16746 | 2.88353 | -0.64281 |
| C | -4.58142 | 6.11916  | -0.58752 | C         | -3.24637 | 3.71133 | 0.04732  |
| N | -4.95541 | 6.95909  | -1.50329 | N         | -2.35821 | 2.82647 | 0.73285  |
| C | -3.93345 | 8.15082  | -1.55051 | C         | -4.69262 | 3.26624 | -1.94089 |
| C | -3.51261 | 8.19020  | -0.07438 | H         | -4.34427 | 2.56452 | -2.71788 |
| C | -3.70433 | 6.75140  | 0.48488  | H         | -4.30270 | 4.25721 | -2.18699 |
| H | -4.14410 | 8.89998  | 0.47825  | H         | -5.79113 | 3.30955 | -1.95573 |
| H | -2.47422 | 8.53121  | 0.02870  | C         | -2.08850 | 3.02429 | 2.15559  |
| C | -4.49729 | 9.44729  | -2.10336 | H         | -2.69421 | 2.33343 | 2.76800  |
| H | -5.14613 | 9.97007  | -1.39624 | H         | -2.36048 | 4.04893 | 2.43055  |
| H | -5.03878 | 9.28310  | -3.04560 | H         | -1.02568 | 2.86654 | 2.39804  |
| H | -3.65297 | 10.11446 | -2.32777 | C         | -3.14458 | 5.07953 | 0.05287  |
| C | -2.79565 | 7.66502  | -2.46039 | N         | -4.18723 | 6.04553 | -0.20922 |
| H | -2.00279 | 8.42630  | -2.45835 | C         | -3.71916 | 7.35292 | 0.35042  |
| H | -3.13259 | 7.53212  | -3.49681 | C         | -2.25323 | 7.32508 | -0.09573 |
| H | -2.35502 | 6.72248  | -2.10859 | C         | -1.79883 | 5.84042 | -0.03079 |
| C | -2.38348 | 6.05070  | 0.83432  | H         | -1.62535 | 7.98121 | 0.52478  |
| H | -1.67170 | 6.04904  | -0.00090 | H         | -2.18623 | 7.69322 | -1.13117 |
| H | -2.54054 | 5.02064  | 1.18473  | C         | -4.45959 | 8.57244 | -0.19493 |
| H | -1.91470 | 6.60294  | 1.66133  | H         | -4.28646 | 8.72448 | -1.26684 |
| C | -4.61058 | 6.76404  | 1.74998  | H         | -4.09949 | 9.46954 | 0.33224  |
| H | -4.08639 | 7.32909  | 2.53584  | H         | -5.54305 | 8.49615 | -0.01929 |
| H | -5.56991 | 7.26943  | 1.56255  | C         | -3.80763 | 7.41030 | 1.88901  |
| H | -4.80246 | 5.75061  | 2.13467  | H         | -3.35602 | 6.52527 | 2.35503  |
| C | -6.11465 | 6.79383  | -2.37728 | H         | -4.85087 | 7.48080 | 2.22174  |
| C | -7.28277 | 7.52918  | -2.03040 | H         | -3.27565 | 8.29782 | 2.26527  |
| C | -8.42961 | 7.29417  | -2.79932 | C         | -1.11832 | 5.44822 | -1.36029 |
| C | -8.42768 | 6.39611  | -3.86443 | H         | -1.81976 | 5.57646 | -2.19936 |
| C | -7.25925 | 5.71737  | -4.19589 | H         | -0.79695 | 4.39511 | -1.33604 |
| C | -6.07500 | 5.88969  | -3.46413 | H         | -0.23063 | 6.07611 | -1.55282 |
| H | -9.34544 | 7.83715  | -2.55911 | C         | -0.77682 | 5.64986 | 1.09969  |
| H | -9.33750 | 6.23177  | -4.44604 | H         | -1.20358 | 5.87318 | 2.08828  |
| H | -7.26286 | 5.03675  | -5.04837 | H         | 0.07476  | 6.33125 | 0.93838  |
| C | -7.37640 | 8.58853  | -0.92790 | H         | -0.37630 | 4.62802 | 1.11399  |
| C | -7.72253 | 9.96181  | -1.54500 | C         | -3.79458 | 1.54841 | -0.42997 |
| H | -7.11580 | 10.19591 | -2.42871 | H         | -2.16650 | 0.65346 | 0.75860  |
| H | -7.57733 | 10.75989 | -0.80083 | H         | -4.33577 | 0.73869 | -0.91359 |
| H | -8.77750 | 9.99230  | -1.85738 | C         | -5.57217 | 5.70401 | -0.32304 |
| C | -8.40831 | 8.27388  | 0.17200  | C         | -6.25490 | 6.04390 | -1.52939 |
| H | -6.39825 | 8.66938  | -0.43349 | C         | -7.58196 | 5.63440 | -1.70717 |
| H | -9.39012 | 8.01446  | -0.25187 | C         | -8.24082 | 4.87064 | -0.74727 |
| H | -8.55157 | 9.15943  | 0.80868  | C         | -7.57903 | 4.54496 | 0.43243  |
| H | -8.10201 | 7.45704  | 0.83938  | C         | -6.26268 | 4.96316 | 0.67753  |
| C | -4.84102 | 5.11578  | -3.91114 | H         | -8.10147 | 5.89406 | -2.63254 |
| C | -5.11808 | 3.60334  | -3.98004 | H         | -9.26570 | 4.53048 | -0.91839 |
| H | -5.55514 | 3.21005  | -3.05044 | H         | -8.09871 | 3.95836 | 1.19388  |
| H | -4.19335 | 3.04800  | -4.20105 | C         | -5.66790 | 4.62951 | 2.04152  |
| H | -5.82434 | 3.36429  | -4.78808 | C         | -6.38137 | 5.40752 | 3.16104  |
| C | -4.33250 | 5.62466  | -5.27265 | H         | -6.43389 | 6.48493 | 2.94837  |
| H | -4.03821 | 5.28464  | -3.17871 | H         | -5.85108 | 5.27382 | 4.11902  |
| H | -5.09162 | 5.47281  | -6.05496 | H         | -7.41445 | 5.04742 | 3.29718  |
| H | -3.42872 | 5.07487  | -5.57672 | C         | -5.69419 | 3.12787 | 2.36537  |
| H | -4.09132 | 6.69830  | -5.25301 | H         | -4.61841 | 4.93637 | 2.02414  |

|   |          |         |          |   |          |         |          |
|---|----------|---------|----------|---|----------|---------|----------|
| H | -5.14934 | 2.93542 | 3.30423  | C | -7.16226 | 5.27108 | -3.05619 |
| H | -5.23068 | 2.53190 | 1.57044  | C | -7.43046 | 5.41015 | -1.69833 |
| H | -6.72367 | 2.76070 | 2.50925  | C | -6.41667 | 5.68244 | -0.77012 |
| C | -5.59480 | 6.80802 | -2.67411 | H | -5.65100 | 5.32125 | -4.58050 |
| C | -6.33294 | 8.12781 | -2.96582 | H | -7.97137 | 5.05718 | -3.75774 |
| H | -7.30620 | 7.93748 | -3.44763 | H | -8.45797 | 5.30251 | -1.34613 |
| H | -5.74444 | 8.75803 | -3.65268 | C | -6.84061 | 5.84011 | 0.68971  |
| H | -6.52623 | 8.70571 | -2.05210 | C | -7.79799 | 7.04112 | 0.83664  |
| C | -5.49381 | 5.99331 | -3.97735 | H | -7.43597 | 7.93277 | 0.30886  |
| H | -4.56955 | 7.03374 | -2.35501 | H | -7.93813 | 7.29778 | 1.89833  |
| H | -5.04492 | 6.61288 | -4.77088 | H | -8.78934 | 6.79644 | 0.42453  |
| H | -6.48446 | 5.66369 | -4.33129 | C | -7.53808 | 4.59673 | 1.27377  |
| H | -4.86640 | 5.09952 | -3.86687 | H | -5.93819 | 6.03010 | 1.28812  |

### 18<sup>rad</sup>

|   |          |         |          |
|---|----------|---------|----------|
| C | -1.88786 | 2.11005 | -1.74018 |
| N | -3.76212 | 2.83203 | -0.82635 |
| C | -2.85410 | 3.84204 | -0.66996 |
| N | -1.69523 | 3.38694 | -1.24710 |
| C | -5.08710 | 2.79542 | -0.23181 |
| H | -5.25627 | 1.80799 | 0.21989  |
| H | -5.86143 | 3.00856 | -0.97947 |
| H | -5.12681 | 3.55801 | 0.54789  |
| C | -0.50475 | 4.17233 | -1.54806 |
| H | -0.19139 | 3.95510 | -2.57762 |
| H | 0.31499  | 3.93316 | -0.85896 |
| H | -0.75206 | 5.23529 | -1.46434 |
| C | -3.03264 | 5.10321 | 0.00183  |
| N | -4.01450 | 6.03170 | -0.30502 |
| C | -3.57568 | 7.36593 | 0.25898  |
| C | -2.92784 | 6.90846 | 1.57511  |
| C | -2.32993 | 5.49569 | 1.31487  |
| H | -3.69861 | 6.85213 | 2.35819  |
| H | -2.16573 | 7.62148 | 1.91840  |
| C | -2.52920 | 8.00894 | -0.66873 |
| H | -1.70369 | 7.31818 | -0.88723 |
| H | -2.10362 | 8.89927 | -0.18211 |
| H | -2.97504 | 8.32532 | -1.62058 |
| C | -4.71365 | 8.35120 | 0.47197  |
| H | -5.41155 | 8.01961 | 1.24686  |
| H | -5.26907 | 8.52999 | -0.46045 |
| H | -4.28878 | 9.31113 | 0.80045  |
| C | -0.79518 | 5.53461 | 1.29879  |
| H | -0.43376 | 5.89806 | 2.27288  |
| H | -0.39846 | 6.21138 | 0.53078  |
| H | -0.36284 | 4.53448 | 1.15003  |
| C | -2.77606 | 4.51013 | 2.41636  |
| H | -3.87372 | 4.46762 | 2.48998  |
| H | -2.38419 | 4.82930 | 3.39593  |
| H | -2.39924 | 3.49309 | 2.21898  |
| C | -3.18309 | 1.77122 | -1.49343 |
| H | -1.09686 | 1.56282 | -2.24520 |
| H | -3.73612 | 0.86574 | -1.72766 |
| C | -5.08284 | 5.82543 | -1.24860 |
| C | -4.80357 | 5.70254 | -2.63466 |
| C | -5.85753 | 5.41673 | -3.51301 |

|   |          |         |          |
|---|----------|---------|----------|
| C | -7.16226 | 5.27108 | -3.05619 |
| C | -7.43046 | 5.41015 | -1.69833 |
| C | -6.41667 | 5.68244 | -0.77012 |
| H | -5.65100 | 5.32125 | -4.58050 |
| H | -7.97137 | 5.05718 | -3.75774 |
| H | -8.45797 | 5.30251 | -1.34613 |
| C | -6.84061 | 5.84011 | 0.68971  |
| C | -7.79799 | 7.04112 | 0.83664  |
| H | -7.43597 | 7.93277 | 0.30886  |
| H | -7.93813 | 7.29778 | 1.89833  |
| H | -8.78934 | 6.79644 | 0.42453  |
| C | -7.53808 | 4.59673 | 1.27377  |
| H | -5.93819 | 6.03010 | 1.28812  |
| H | -7.93751 | 4.82717 | 2.27365  |
| H | -6.86990 | 3.73349 | 1.38626  |
| H | -8.38846 | 4.28214 | 0.64969  |
| C | -3.42475 | 5.90701 | -3.24665 |
| C | -3.39761 | 7.18027 | -4.11161 |
| H | -4.03406 | 7.06398 | -5.00242 |
| H | -2.37515 | 7.39506 | -4.46150 |
| H | -3.76679 | 8.05691 | -3.55907 |
| C | -2.97864 | 4.69337 | -4.07689 |
| H | -2.70676 | 6.04347 | -2.42964 |
| H | -1.94040 | 4.82096 | -4.42371 |
| H | -3.60201 | 4.57118 | -4.97545 |
| H | -3.04487 | 3.75544 | -3.50860 |

### 18<sup>biscat</sup>

|   |          |         |          |
|---|----------|---------|----------|
| C | -3.49882 | 1.58261 | 1.15594  |
| N | -3.78827 | 2.77992 | -0.67473 |
| C | -3.46905 | 3.64326 | 0.31344  |
| N | -3.28715 | 2.91352 | 1.44311  |
| C | -4.09304 | 3.10413 | -2.06778 |
| H | -3.60233 | 2.37227 | -2.72152 |
| H | -3.71251 | 4.09947 | -2.29395 |
| H | -5.17987 | 3.08807 | -2.22396 |
| C | -3.06883 | 3.38300 | 2.81815  |
| H | -3.86760 | 2.97794 | 3.45124  |
| H | -3.10729 | 4.47281 | 2.85477  |
| H | -2.09399 | 3.03339 | 3.18105  |
| C | -3.23740 | 5.11245 | 0.22559  |
| N | -4.16867 | 5.98420 | -0.01625 |
| C | -3.66575 | 7.40737 | 0.41946  |
| C | -2.16489 | 7.24028 | 0.15949  |
| C | -1.84429 | 5.72952 | 0.31812  |
| H | -1.57826 | 7.85436 | 0.85435  |
| H | -1.92005 | 7.57503 | -0.85896 |
| C | -4.31364 | 8.56619 | -0.31267 |
| H | -3.97905 | 8.66156 | -1.34906 |
| H | -4.02318 | 9.48824 | 0.21193  |
| H | -5.41009 | 8.50310 | -0.28394 |
| C | -3.99080 | 7.51828 | 1.91670  |
| H | -3.56005 | 6.69640 | 2.50404  |
| H | -5.07181 | 7.55083 | 2.09856  |
| H | -3.56227 | 8.45882 | 2.29183  |
| C | -1.09924 | 5.18494 | -0.93116 |

|           |          |         |          |   |           |         |          |
|-----------|----------|---------|----------|---|-----------|---------|----------|
| H         | -1.66801 | 5.36015 | -1.85708 | H | -2.90092  | 0.90622 | -0.00572 |
| H         | -0.87120 | 4.11165 | -0.84217 | H | -2.92944  | 1.34178 | 1.72779  |
| H         | -0.14394 | 5.72456 | -1.02077 | H | -2.27036  | 2.46872 | 0.50730  |
| C         | -1.00299 | 5.42460 | 1.56722  | N | -5.36685  | 5.85130 | 1.32889  |
| H         | -1.45925 | 5.81026 | 2.48837  | C | -4.64291  | 7.15038 | 1.29058  |
| H         | -0.03204 | 5.92712 | 1.45026  | C | -3.52822  | 6.86072 | 0.25734  |
| H         | -0.79442 | 4.35178 | 1.68054  | C | -3.23120  | 5.34283 | 0.31853  |
| C         | -3.80717 | 1.49837 | -0.17238 | H | -2.62686  | 7.46471 | 0.43796  |
| H         | -3.42859 | 0.81142 | 1.92027  | H | -3.89940  | 7.12730 | -0.74416 |
| H         | -4.03900 | 0.63830 | -0.79680 | C | -5.52936  | 8.30116 | 0.81069  |
| C         | -5.50752 | 5.66831 | -0.51067 | H | -4.92651  | 9.22100 | 0.75305  |
| C         | -5.78289 | 5.92170 | -1.88371 | H | -6.36748  | 8.48452 | 1.49564  |
| C         | -7.03413 | 5.51200 | -2.36335 | H | -5.95132  | 8.10057 | -0.18370 |
| C         | -7.97054 | 4.89260 | -1.53946 | C | -4.05684  | 7.50143 | 2.67580  |
| C         | -7.67881 | 4.68080 | -0.19521 | H | -3.60326  | 6.61880 | 3.14685  |
| C         | -6.44737 | 5.06128 | 0.35653  | H | -4.83402  | 7.87570 | 3.35308  |
| H         | -7.28366 | 5.69097 | -3.41067 | H | -3.28529  | 8.28331 | 2.59052  |
| H         | -8.93659 | 4.58426 | -1.94549 | C | -2.93014  | 4.79529 | -1.09018 |
| H         | -8.42953 | 4.21797 | 0.44709  | H | -3.75471  | 5.00304 | -1.78495 |
| C         | -6.23097 | 4.84625 | 1.84731  | H | -2.77452  | 3.70910 | -1.09089 |
| C         | -7.10687 | 5.80955 | 2.66913  | H | -2.02221  | 5.27664 | -1.49017 |
| H         | -6.98975 | 6.85367 | 2.34311  | C | -2.01064  | 5.09960 | 1.23320  |
| H         | -6.84886 | 5.75053 | 3.73806  | H | -2.14220  | 5.57340 | 2.21494  |
| H         | -8.17294 | 5.55644 | 2.56550  | H | -1.10613  | 5.52761 | 0.76986  |
| C         | -6.50194 | 3.39040 | 2.26344  | H | -1.82940  | 4.03269 | 1.40851  |
| H         | -5.18438 | 5.07988 | 2.08766  | C | -6.79056  | 5.74185 | 1.18533  |
| H         | -6.22958 | 3.23223 | 3.31875  | C | -7.63207  | 5.85702 | 2.31999  |
| H         | -5.95407 | 2.66744 | 1.64082  | C | -9.01504  | 5.70118 | 2.16623  |
| H         | -7.56991 | 3.14193 | 2.17738  | C | -9.57697  | 5.41610 | 0.92469  |
| C         | -4.85414 | 6.64517 | -2.86261 | C | -8.75044  | 5.31860 | -0.19037 |
| C         | -5.51157 | 7.96863 | -3.32038 | C | -7.36348  | 5.49762 | -0.09237 |
| H         | -6.30325 | 7.76784 | -4.05791 | H | -9.66311  | 5.78682 | 3.04147  |
| H         | -4.76726 | 8.61438 | -3.81106 | H | -10.65650 | 5.27622 | 0.82361  |
| H         | -5.97078 | 8.52899 | -2.49641 | H | -9.19511  | 5.11483 | -1.16729 |
| C         | -4.48234 | 5.83843 | -4.12531 | C | -6.55159  | 5.47122 | -1.38212 |
| H         | -3.91378 | 6.87854 | -2.34058 | C | -6.37315  | 4.05864 | -1.96323 |
| H         | -3.98115 | 6.50315 | -4.84455 | H | -5.78258  | 3.41867 | -1.29676 |
| H         | -5.37268 | 5.43062 | -4.62726 | H | -5.84226  | 4.10529 | -2.92929 |
| H         | -3.78926 | 5.00657 | -3.93892 | H | -7.34980  | 3.58030 | -2.14580 |
|           |          |         |          | C | -7.14513  | 6.41032 | -2.44716 |
| <b>22</b> |          |         |          | H | -5.55340  | 5.85068 | -1.14185 |
| C         | -6.63194 | 2.07843 | 1.17324  | H | -8.09091  | 6.01840 | -2.85494 |
| C         | -5.45557 | 1.30885 | 0.53713  | H | -6.44811  | 6.51767 | -3.29424 |
| N         | -5.98796 | 3.12658 | 1.96097  | H | -7.35053  | 7.41292 | -2.03951 |
| H         | -7.27999 | 1.44139 | 1.79220  | C | -7.08024  | 6.13125 | 3.70965  |
| H         | -7.25440 | 2.55463 | 0.40045  | C | -7.32920  | 7.58724 | 4.14173  |
| C         | -4.84795 | 3.48400 | 1.16738  | H | -6.95233  | 8.31168 | 3.40712  |
| N         | -4.37787 | 2.30710 | 0.46626  | H | -6.84235  | 7.79826 | 5.10869  |
| H         | -5.70749 | 0.90715 | -0.46019 | H | -8.40899  | 7.77572 | 4.26076  |
| H         | -5.15413 | 0.45188 | 1.17132  | C | -7.64724  | 5.18600 | 4.77922  |
| C         | -4.52663 | 4.78633 | 0.93842  | H | -5.99639  | 5.96277 | 3.65174  |
| C         | -5.60269 | 2.70413 | 3.30567  | H | -8.70342  | 5.41094 | 5.00087  |
| H         | -6.49611 | 2.38490 | 3.86475  | H | -7.08624  | 5.29709 | 5.72170  |
| H         | -5.15240 | 3.55313 | 3.83891  | H | -7.58677  | 4.13745 | 4.46131  |
| H         | -4.87315 | 1.86724 | 3.32636  |   |           |         |          |
| C         | -3.06394 | 1.73889 | 0.69733  |   |           |         |          |

**22<sup>rad</sup>**

|   |          |         |          |                  |          |         |          |
|---|----------|---------|----------|------------------|----------|---------|----------|
| C | -6.68562 | 2.56477 | 0.72024  | H                | -4.21052 | 3.98577 | -5.78307 |
| C | -5.52715 | 1.56351 | 0.59024  | H                | -2.69913 | 3.55008 | -4.97145 |
| N | -6.04239 | 3.87597 | 0.51276  | H                | -3.23490 | 5.24768 | -4.99562 |
| H | -7.17739 | 2.52685 | 1.70063  | C                | -7.24268 | 7.16357 | -0.69206 |
| H | -7.45061 | 2.39981 | -0.05449 | C                | -7.61898 | 8.64805 | -0.82535 |
| C | -4.81785 | 3.67644 | -0.08187 | H                | -6.81038 | 9.25455 | -1.25336 |
| N | -4.51113 | 2.36104 | -0.10777 | H                | -7.87317 | 9.06542 | 0.16198  |
| H | -5.79717 | 0.68813 | -0.01818 | H                | -8.50478 | 8.78073 | -1.46470 |
| H | -5.13739 | 1.19839 | 1.55735  | C                | -8.44606 | 6.39500 | -0.10667 |
| C | -4.00429 | 4.75206 | -0.55572 | H                | -6.40577 | 7.07984 | 0.01205  |
| C | -6.11864 | 4.83292 | 1.61924  | H                | -9.34054 | 6.54859 | -0.72943 |
| H | -7.16354 | 5.09360 | 1.81863  | H                | -8.68509 | 6.75583 | 0.90688  |
| H | -5.57914 | 5.74797 | 1.35503  | H                | -8.25568 | 5.31331 | -0.06779 |
| H | -5.67187 | 4.40736 | 2.53631  |                  |          |         |          |
| C | -3.38527 | 1.71769 | -0.74887 | <b>22</b> biscat |          |         |          |
| H | -3.72406 | 0.80408 | -1.25804 | C                | -6.10979 | 1.79019 | 0.27788  |
| H | -2.61286 | 1.43981 | -0.01212 | C                | -4.80228 | 1.21407 | -0.28569 |
| H | -2.94939 | 2.38819 | -1.49393 | N                | -5.80895 | 3.23347 | 0.38953  |
| N | -4.55868 | 5.81869 | -1.21893 | H                | -6.38107 | 1.38331 | 1.26205  |
| C | -3.57274 | 6.96971 | -1.31597 | H                | -6.96796 | 1.65913 | -0.40125 |
| C | -2.58310 | 6.59166 | -0.20370 | C                | -4.67655 | 3.51491 | -0.23585 |
| C | -2.57029 | 5.04719 | -0.08687 | N                | -4.05593 | 2.42858 | -0.68957 |
| H | -2.94390 | 7.01796 | 0.74533  | H                | -4.95292 | 0.55958 | -1.15569 |
| H | -1.58164 | 7.00200 | -0.39118 | H                | -4.21029 | 0.66402 | 0.46413  |
| C | -2.93786 | 7.02361 | -2.71316 | C                | -4.07662 | 4.88663 | -0.39191 |
| H | -2.17752 | 7.81771 | -2.73746 | C                | -6.78753 | 4.14545 | 0.94877  |
| H | -3.69629 | 7.25991 | -3.47285 | H                | -7.64867 | 4.24401 | 0.27112  |
| H | -2.45015 | 6.08519 | -2.99700 | H                | -6.33544 | 5.12729 | 1.09799  |
| C | -4.21068 | 8.32804 | -1.03699 | H                | -7.12882 | 3.75923 | 1.92055  |
| H | -4.67308 | 8.37427 | -0.04203 | C                | -2.77581 | 2.28295 | -1.36822 |
| H | -4.96127 | 8.58269 | -1.79488 | H                | -2.91641 | 1.65816 | -2.26003 |
| H | -3.42218 | 9.09468 | -1.08213 | H                | -2.04721 | 1.79639 | -0.70287 |
| C | -1.43109 | 4.45376 | -0.94798 | H                | -2.38712 | 3.25398 | -1.68349 |
| H | -1.60088 | 4.57075 | -2.02600 | N                | -4.44432 | 5.70906 | -1.32140 |
| H | -1.27049 | 3.38903 | -0.73777 | C                | -3.34271 | 6.81729 | -1.49869 |
| H | -0.49335 | 4.97388 | -0.69912 | C                | -2.78075 | 6.84624 | -0.06975 |
| C | -2.34893 | 4.61120 | 1.37244  | C                | -3.00325 | 5.43054 | 0.53549  |
| H | -3.11014 | 5.03601 | 2.04336  | H                | -3.32098 | 7.59601 | 0.52563  |
| H | -1.36336 | 4.95603 | 1.72231  | H                | -1.71991 | 7.12880 | -0.06654 |
| H | -2.36954 | 3.51569 | 1.47911  | C                | -2.33107 | 6.26015 | -2.50841 |
| C | -5.64769 | 5.72415 | -2.17538 | H                | -1.48376 | 6.95836 | -2.56163 |
| C | -6.82499 | 6.50181 | -2.00157 | H                | -2.76295 | 6.18436 | -3.51326 |
| C | -7.74944 | 6.56068 | -3.05387 | H                | -1.93545 | 5.27912 | -2.21438 |
| C | -7.56441 | 5.84759 | -4.23227 | C                | -3.88022 | 8.14130 | -2.00779 |
| C | -6.45373 | 5.02040 | -4.35552 | H                | -4.43952 | 8.69589 | -1.24937 |
| C | -5.48121 | 4.93413 | -3.34979 | H                | -4.50643 | 8.00270 | -2.90018 |
| H | -8.65073 | 7.16305 | -2.93205 | H                | -3.02392 | 8.76261 | -2.30719 |
| H | -8.29564 | 5.91718 | -5.04084 | C                | -1.71847 | 4.58701 | 0.63138  |
| H | -6.32753 | 4.42991 | -5.26463 | H                | -1.18268 | 4.51664 | -0.32336 |
| C | -4.33932 | 3.95195 | -3.59502 | H                | -1.92169 | 3.57395 | 1.00780  |
| C | -4.87484 | 2.50826 | -3.58575 | H                | -1.04414 | 5.07089 | 1.35198  |
| H | -5.39679 | 2.27049 | -2.64756 | C                | -3.64243 | 5.52135 | 1.94662  |
| H | -4.05525 | 1.78674 | -3.72931 | H                | -4.55832 | 6.13013 | 1.94861  |
| H | -5.59306 | 2.35248 | -4.40468 | H                | -2.91916 | 6.01336 | 2.61458  |
| C | -3.58046 | 4.20783 | -4.90806 | H                | -3.86502 | 4.52869 | 2.36704  |
| H | -3.61995 | 4.04834 | -2.77220 | C                | -5.70866 | 5.57325 | -2.05919 |



|           |          |         |          |                         |          |          |          |
|-----------|----------|---------|----------|-------------------------|----------|----------|----------|
| C         | -6.82422 | 6.30778 | -1.56667 | H                       | -4.27117 | 10.32111 | -0.98975 |
| C         | -8.07042 | 6.02055 | -2.14031 | C                       | -1.85891 | 5.90936  | -0.82251 |
| C         | -8.21237 | 5.07708 | -3.15527 | H                       | -1.87217 | 6.07658  | -1.90778 |
| C         | -7.08934 | 4.42937 | -3.66107 | H                       | -1.60013 | 4.85836  | -0.64839 |
| C         | -5.80947 | 4.66211 | -3.13673 | H                       | -1.04307 | 6.51704  | -0.39859 |
| H         | -8.94964 | 6.56232 | -1.78774 | C                       | -3.16039 | 5.75150  | 1.30530  |
| H         | -9.19820 | 4.86603 | -3.57616 | H                       | -2.35043 | 6.24990  | 1.86298  |
| H         | -7.20552 | 3.73472 | -4.49404 | H                       | -4.11112 | 5.95377  | 1.82092  |
| C         | -4.62122 | 3.99468 | -3.81485 | H                       | -2.98536 | 4.66802  | 1.33996  |
| C         | -4.84197 | 2.49308 | -4.05476 | C                       | -5.98888 | 6.89984  | -2.60033 |
| H         | -5.18304 | 1.97286 | -3.14666 | C                       | -7.30251 | 7.40879  | -2.39009 |
| H         | -3.91553 | 2.01788 | -4.41107 | C                       | -8.21584 | 7.38369  | -3.45166 |
| H         | -5.59898 | 2.31295 | -4.83160 | C                       | -7.87834 | 6.85167  | -4.69203 |
| C         | -4.31360 | 4.70444 | -5.14946 | C                       | -6.61381 | 6.30251  | -4.87424 |
| H         | -3.74281 | 4.11222 | -3.16653 | C                       | -5.65613 | 6.30639  | -3.85128 |
| H         | -5.15712 | 4.59625 | -5.84813 | H                       | -9.22204 | 7.77826  | -3.29464 |
| H         | -3.42382 | 4.26586 | -5.62684 | H                       | -8.60558 | 6.84845  | -5.50799 |
| H         | -4.14006 | 5.78298 | -5.01652 | H                       | -6.35930 | 5.85145  | -5.83583 |
| C         | -6.75311 | 7.46263 | -0.56335 | C                       | -7.80399 | 7.93134  | -1.04639 |
| C         | -7.01081 | 8.79228 | -1.31136 | C                       | -8.35159 | 9.36588  | -1.14729 |
| H         | -6.45850 | 8.86846 | -2.25544 | H                       | -7.63956 | 10.05705 | -1.61790 |
| H         | -6.73658 | 9.64706 | -0.67378 | H                       | -8.60000 | 9.75656  | -0.14680 |
| H         | -8.08052 | 8.88875 | -1.55190 | H                       | -9.27830 | 9.39392  | -1.74285 |
| C         | -7.74800 | 7.38985 | 0.60951  | C                       | -8.88889 | 7.02137  | -0.44419 |
| H         | -5.74101 | 7.49200 | -0.13080 | H                       | -6.95317 | 7.91491  | -0.35383 |
| H         | -8.78498 | 7.29167 | 0.25562  | H                       | -9.75247 | 6.92532  | -1.12217 |
| H         | -7.69406 | 8.32456 | 1.18702  | H                       | -9.25714 | 7.45010  | 0.50282  |
| H         | -7.55556 | 6.57212 | 1.31437  | H                       | -8.49580 | 6.01586  | -0.24391 |
| <b>25</b> |          |         |          | C                       | -4.32796 | 5.61182  | -4.14152 |
| C         | -7.56867 | 0.91721 | 0.85950  | C                       | -4.53236 | 4.09679  | -4.32096 |
| C         | -6.27331 | 0.60979 | 1.28353  | H                       | -5.00461 | 3.64719  | -3.43802 |
| C         | -7.80351 | 2.04548 | 0.05892  | H                       | -3.56825 | 3.59448  | -4.50559 |
| C         | -5.42118 | 2.56594 | 0.15332  | H                       | -5.18556 | 3.88687  | -5.18322 |
| C         | -5.19049 | 1.42849 | 0.92895  | C                       | -3.61615 | 6.18974  | -5.37562 |
| H         | -4.18077 | 1.18674 | 1.26787  | H                       | -3.67372 | 5.75424  | -3.27428 |
| H         | -8.40462 | 0.27528 | 1.14718  | H                       | -4.20048 | 6.01305  | -6.29247 |
| C         | -6.72949 | 2.86119 | -0.28748 | H                       | -2.63749 | 5.70181  | -5.51540 |
| H         | -8.80938 | 2.28022 | -0.29778 | H                       | -3.44758 | 7.27315  | -5.28994 |
| S         | -6.75424 | 4.28126 | -1.34474 | H                       | -6.09603 | -0.27292 | 1.90262  |
| C         | -5.03974 | 4.63512 | -0.86215 | C                       | -3.27833 | 8.46050  | -2.60412 |
| N         | -4.44937 | 3.45947 | -0.32410 | H                       | -3.90461 | 8.66166  | -3.48587 |
| C         | -3.24399 | 2.88125 | -0.91421 | H                       | -2.62536 | 7.61351  | -2.83810 |
| H         | -3.44583 | 1.86155 | -1.28691 | H                       | -2.64184 | 9.34244  | -2.43399 |
| H         | -2.41097 | 2.82378 | -0.19229 | <b>25<sup>rad</sup></b> |          |          |          |
| H         | -2.92556 | 3.50175 | -1.76015 | C                       | -7.59214 | 0.69721  | 0.08551  |
| C         | -4.46545 | 5.86231 | -0.89619 | C                       | -6.29757 | 0.33139  | 0.49315  |
| N         | -5.01628 | 6.98417 | -1.54825 | C                       | -7.84090 | 1.96399  | -0.44153 |
| C         | -4.16978 | 8.20333 | -1.37524 | C                       | -5.47319 | 2.49532  | -0.13406 |
| C         | -3.37828 | 7.82020 | -0.11766 | C                       | -5.22578 | 1.21685  | 0.38508  |
| C         | -3.19326 | 6.28401 | -0.13665 | H                       | -4.23182 | 0.92002  | 0.72152  |
| H         | -3.97892 | 8.09434 | 0.76371  | H                       | -8.41306 | -0.01510 | 0.18795  |
| H         | -2.42022 | 8.35482 | -0.04197 | C                       | -6.76956 | 2.85547  | -0.54099 |
| C         | -4.97249 | 9.48429 | -1.13142 | H                       | -8.84027 | 2.25484  | -0.77143 |
| H         | -5.59979 | 9.41624 | -0.23394 | S                       | -6.79548 | 4.47293  | -1.19792 |
| H         | -5.60979 | 9.72549 | -1.99291 | C                       | -5.08077 | 4.69776  | -0.80946 |

|   |          |          |          |                  |          |          |          |
|---|----------|----------|----------|------------------|----------|----------|----------|
| N | -4.53837 | 3.51115  | -0.35467 | H                | -2.47056 | 7.33939  | -2.74354 |
| C | -3.12499 | 3.15686  | -0.43222 | H                | -2.36431 | 9.09730  | -2.52241 |
| H | -3.04438 | 2.13314  | -0.82230 |                  |          |          |          |
| H | -2.63334 | 3.20224  | 0.55028  | <b>25</b> biscat |          |          |          |
| H | -2.61935 | 3.82713  | -1.12862 | C                | -7.19706 | 0.62415  | -0.18244 |
| C | -4.43532 | 5.95450  | -0.87410 | C                | -5.92175 | 0.03650  | -0.34351 |
| N | -4.92954 | 6.99009  | -1.60786 | C                | -7.36521 | 2.00311  | -0.16144 |
| C | -4.06817 | 8.23178  | -1.50359 | C                | -4.94688 | 2.20447  | -0.49500 |
| C | -3.43824 | 7.97751  | -0.13373 | C                | -4.78036 | 0.81469  | -0.50261 |
| C | -3.24940 | 6.44241  | -0.00436 | H                | -3.79700 | 0.35802  | -0.62734 |
| H | -4.14055 | 8.32194  | 0.64079  | H                | -8.07072 | -0.02088 | -0.06959 |
| H | -2.49632 | 8.52248  | 0.00816  | C                | -6.21773 | 2.79602  | -0.32055 |
| C | -4.85067 | 9.54272  | -1.55309 | H                | -8.35515 | 2.44187  | -0.03618 |
| H | -5.49158 | 9.69393  | -0.67809 | N                | -6.14564 | 4.19008  | -0.34567 |
| H | -5.46275 | 9.61024  | -2.46327 | C                | -4.91984 | 4.67868  | -0.56021 |
| H | -4.12666 | 10.36988 | -1.58096 | S                | -3.73162 | 3.43296  | -0.68528 |
| C | -1.82773 | 6.04257  | -0.49561 | C                | -4.50977 | 6.09679  | -0.64920 |
| H | -1.77527 | 5.86550  | -1.57816 | N                | -5.05883 | 7.00321  | -1.41169 |
| H | -1.45352 | 5.14898  | 0.01625  | C                | -4.14539 | 8.28470  | -1.44583 |
| H | -1.11916 | 6.85032  | -0.26530 | C                | -3.42277 | 8.12617  | -0.10821 |
| C | -3.42526 | 6.02767  | 1.46690  | C                | -3.33197 | 6.61202  | 0.18217  |
| H | -2.68018 | 6.55480  | 2.08263  | H                | -4.01069 | 8.62123  | 0.67938  |
| H | -4.42464 | 6.29719  | 1.83996  | H                | -2.43338 | 8.60034  | -0.12743 |
| H | -3.28113 | 4.95053  | 1.62622  | C                | -4.88661 | 9.60097  | -1.55650 |
| C | -5.99704 | 6.86424  | -2.56759 | H                | -5.50686 | 9.82138  | -0.68196 |
| C | -7.28260 | 7.37216  | -2.24092 | H                | -5.48981 | 9.65280  | -2.47022 |
| C | -8.31719 | 7.17133  | -3.16301 | H                | -4.12282 | 10.38996 | -1.62712 |
| C | -8.10183 | 6.49968  | -4.36294 | C                | -1.95130 | 6.04173  | -0.22699 |
| C | -6.83530 | 6.00482  | -4.66282 | H                | -1.73810 | 6.14389  | -1.29845 |
| C | -5.76160 | 6.16008  | -3.77835 | H                | -1.82019 | 4.99254  | 0.06934  |
| H | -9.31681 | 7.53913  | -2.92527 | H                | -1.18694 | 6.61332  | 0.31968  |
| H | -8.92593 | 6.35149  | -5.06449 | C                | -3.57789 | 6.29629  | 1.67261  |
| H | -6.67867 | 5.46863  | -5.60060 | H                | -2.83626 | 6.84481  | 2.27256  |
| C | -7.62166 | 8.07518  | -0.92823 | H                | -4.57606 | 6.61917  | 2.00682  |
| C | -8.22133 | 9.47027  | -1.18374 | H                | -3.45272 | 5.22590  | 1.89360  |
| H | -7.60040 | 10.07318 | -1.86024 | C                | -6.13869 | 6.82254  | -2.37638 |
| H | -8.33380 | 10.01914 | -0.23582 | C                | -7.36678 | 7.53431  | -2.20869 |
| H | -9.22158 | 9.39575  | -1.63851 | C                | -8.32260 | 7.40163  | -3.22361 |
| C | -8.57252 | 7.25281  | -0.04162 | C                | -8.10238 | 6.61830  | -4.35224 |
| H | -6.69231 | 8.19380  | -0.35799 | C                | -6.90981 | 5.91581  | -4.47734 |
| H | -9.49012 | 6.97213  | -0.58252 | C                | -5.90213 | 5.98597  | -3.50557 |
| H | -8.87272 | 7.84800  | 0.83491  | H                | -9.27168 | 7.92911  | -3.12387 |
| H | -8.09691 | 6.33127  | 0.32166  | H                | -8.86507 | 6.55065  | -5.13113 |
| C | -4.43303 | 5.50602  | -4.14956 | H                | -6.74700 | 5.29700  | -5.36064 |
| C | -4.56920 | 3.97440  | -4.22817 | C                | -7.77639 | 8.39498  | -1.00719 |
| H | -4.92279 | 3.54329  | -3.28084 | C                | -8.09155 | 9.85093  | -1.42175 |
| H | -3.60171 | 3.51417  | -4.48451 | H                | -7.34075 | 10.29261 | -2.08471 |
| H | -5.28834 | 3.67771  | -5.00636 | H                | -8.18038 | 10.48586 | -0.52726 |
| C | -3.87227 | 6.05413  | -5.47251 | H                | -9.05575 | 9.89898  | -1.94925 |
| H | -3.70302 | 5.72834  | -3.36114 | C                | -9.03708 | 7.86611  | -0.28685 |
| H | -4.54200 | 5.81924  | -6.31417 | H                | -6.94845 | 8.39926  | -0.27949 |
| H | -2.89499 | 5.59649  | -5.69283 | H                | -9.89982 | 7.84922  | -0.96819 |
| H | -3.73983 | 7.14566  | -5.44798 | H                | -9.29458 | 8.54243  | 0.54147  |
| H | -6.12480 | -0.66150 | 0.91349  | H                | -8.93379 | 6.86020  | 0.13924  |
| C | -3.06045 | 8.25826  | -2.66430 | C                | -4.65555 | 5.14190  | -3.76543 |
| H | -3.58716 | 8.41481  | -3.61617 | C                | -5.02763 | 3.64612  | -3.80216 |

|                        |          |          |          |   |          |          |          |
|------------------------|----------|----------|----------|---|----------|----------|----------|
| H                      | -5.63629 | 3.33633  | -2.94116 | H | -2.21459 | 6.91333  | 1.98806  |
| H                      | -4.12261 | 3.02133  | -3.83927 | H | -3.98110 | 6.68780  | 2.09410  |
| H                      | -5.61944 | 3.41489  | -4.70003 | H | -2.91227 | 5.28641  | 1.86347  |
| C                      | -3.93882 | 5.51762  | -5.07440 | C | -6.14049 | 6.83507  | -2.26263 |
| H                      | -3.93234 | 5.29346  | -2.95089 | C | -7.40873 | 7.49125  | -2.17012 |
| H                      | -4.57925 | 5.32252  | -5.94715 | C | -8.36114 | 7.27716  | -3.17646 |
| H                      | -3.03150 | 4.90597  | -5.19216 | C | -8.12287 | 6.41785  | -4.24241 |
| H                      | -3.64111 | 6.57454  | -5.10555 | C | -6.90261 | 5.75845  | -4.31406 |
| C                      | -7.32548 | 5.01050  | -0.07567 | C | -5.89642 | 5.95137  | -3.35589 |
| H                      | -7.00683 | 6.01392  | 0.21179  | H | -9.32657 | 7.78243  | -3.10895 |
| H                      | -7.88025 | 4.56002  | 0.75690  | H | -8.88579 | 6.25902  | -5.00884 |
| H                      | -7.95575 | 5.05897  | -0.97284 | H | -6.71286 | 5.07826  | -5.14644 |
| H                      | -5.82995 | -1.05188 | -0.34258 | C | -7.85273 | 8.40027  | -1.01873 |
| C                      | -3.25568 | 8.12266  | -2.68410 | C | -8.16802 | 9.83378  | -1.49562 |
| H                      | -3.85063 | 8.23184  | -3.60076 | H | -7.36771 | 10.27307 | -2.10120 |
| H                      | -2.72923 | 7.16260  | -2.72023 | H | -8.34704 | 10.49561 | -0.63249 |
| H                      | -2.50193 | 8.92305  | -2.67486 | H | -9.08276 | 9.84365  | -2.10971 |
| <b>25 [(E) isomer]</b> |          |          |          | C | -9.11715 | 7.89350  | -0.29255 |
| C                      | -7.30554 | 0.67471  | -0.76656 | H | -7.03357 | 8.43100  | -0.28783 |
| C                      | -6.13984 | 0.07246  | -0.28709 | H | -9.98033 | 7.86731  | -0.97573 |
| C                      | -7.39368 | 2.06855  | -0.89674 | H | -9.37525 | 8.58282  | 0.52737  |
| C                      | -5.12029 | 2.23998  | -0.05934 | H | -9.00401 | 6.89340  | 0.14172  |
| C                      | -5.03509 | 0.85746  | 0.07545  | C | -4.59186 | 5.19113  | -3.60664 |
| H                      | -4.12758 | 0.39346  | 0.46863  | C | -4.80167 | 3.66742  | -3.61838 |
| H                      | -8.16069 | 0.05604  | -1.04872 | H | -5.19331 | 3.29555  | -2.66689 |
| C                      | -6.29333 | 2.85454  | -0.54351 | H | -3.84797 | 3.15576  | -3.82612 |
| H                      | -8.29963 | 2.53669  | -1.28546 | H | -5.51049 | 3.36785  | -4.40621 |
| N                      | -6.23595 | 4.24710  | -0.56264 | C | -3.93961 | 5.60368  | -4.94044 |
| C                      | -4.95387 | 4.77661  | -0.28023 | H | -3.89487 | 5.41536  | -2.79272 |
| S                      | -3.90447 | 3.43959  | 0.37471  | H | -4.55349 | 5.27719  | -5.79498 |
| C                      | -4.49119 | 6.03122  | -0.52594 | H | -2.95377 | 5.12155  | -5.04337 |
| N                      | -5.13634 | 7.07650  | -1.25400 | H | -3.79778 | 6.68911  | -5.02812 |
| C                      | -4.20228 | 8.24694  | -1.41625 | C | -7.42831 | 4.97602  | -0.16303 |
| C                      | -3.26658 | 8.06251  | -0.21890 | H | -7.12737 | 5.96419  | 0.19467  |
| C                      | -3.16695 | 6.55268  | 0.06686  | H | -7.94731 | 4.44680  | 0.65699  |
| H                      | -3.71243 | 8.56699  | 0.65249  | H | -8.12588 | 5.10605  | -1.00183 |
| H                      | -2.28173 | 8.51929  | -0.39668 | H | -6.08299 | -1.01374 | -0.18585 |
| C                      | -4.88402 | 9.61083  | -1.32929 | C | -3.45541 | 8.21377  | -2.76001 |
| H                      | -5.44632 | 9.73749  | -0.39494 | H | -4.16557 | 8.32378  | -3.59225 |
| H                      | -5.55442 | 9.77678  | -2.18011 | H | -2.89737 | 7.28490  | -2.90880 |
| H                      | -4.10878 | 10.39220 | -1.36889 | H | -2.73983 | 9.04858  | -2.81387 |
| C                      | -1.91476 | 5.94501  | -0.60131 |   |          |          |          |
| H                      | -1.86661 | 6.17065  | -1.67456 |   |          |          |          |
| H                      | -1.88342 | 4.85273  | -0.48552 |   |          |          |          |
| H                      | -1.01016 | 6.36302  | -0.12924 |   |          |          |          |
| C                      | -3.06740 | 6.33941  | 1.58925  |   |          |          |          |

## 5. References

- 1 D. L. Lichtenberger, R. L. Johnston, K. Hinkelmann, T. Suzuki and F. Wudl, *J. Am. Chem. Soc.*, 1990, **112**, 3302.
- 2 T. Murata, Y. Morita and K. Nakasuji, *Tetrahedron*, 2005, **61**, 6056.
- 3 J. Broggi, T. Terme and P. Vanelle, *Angew. Chem. Int. Ed.*, 2014, **53**, 384.
- 4 Y. Morita, E. Miyazaki, K. Fukui, S. Maki and K. Nakasuji, *Bull. Chem. Soc. Jpn.*, 2005, **78**, 2014.
- 5 J. Pak, R. Ali and J. S. Park, *Bull. Korean Chem. Soc.*, 2016, **37**, 732.
- 6 L. Boudiba, L. Kaboub, A. Gouasmia and J. M. Fabre, *Synthesis*, 2005, **2005**, 1291.
- 7 T. M. Bockman and J. K. Kochi, *J. Org. Chem.*, 1990, **55**, 4127.
- 8 J. R. Ames, M. A. Houghtaling, D. L. Terrian and T. P. Mitchell, *Can. J. Chem.*, 1997, **75**, 28.
- 9 J. A. Murphy, J. Garnier, S. R. Park, F. Schoenebeck, S. Z. Zhou and A. T. Turner, *Org. Lett.*, 2008, **10**, 1227.
- 10 S. Hünig, H. Schlaf, G. Kießlich and D. Scheutzow, *Tetrahedron Lett.*, 1969, **10**, 2271.
- 11 L. Krause, R. Herbst-Irmer, G. M. Sheldrick and D. Stalke, *J. Appl. Crystallogr.*, 2015, **48**, 3.
- 12 G. M. Sheldrick, *Acta Cryst.*, 2015, **A71**, 3.
- 13 G. M. Sheldrick, *Acta Cryst.*, 2015, **C71**, 3.
- 14 O. V. Dolomanov, L. J. Bourhis, R. J. Gildea, J. A. K. Howard and H. Puschmann, *J. Appl. Crystallogr.*, 2009, **42**, 339.
- 15 V. Khodorkovsky, A. Edzifna and O. Neilands, *J. Mol. Electron.*, 1989, **5**, 33.
- 16 S. Hünig, J. Groß and W. Schenk, *Liebigs Ann.*, 1973, 324.
- 17 J. Garnier, A. R. Kennedy, L. E. A. Berlouis, A. T. Turner and J. A. Murphy, *Beilstein J. Org. Chem.*, 2010, **6**, 73.
- 18 D. J. Sandman, T. J. Holmes and D. E. Warner, *J. Org. Chem.*, 1979, **44**, 880.
- 19 Z. Shi, V. Gouille and R. P. Thummel, *Tetrahedron Lett.*, 1996, **37**, 2357.
- 20 V. Gouille, S. Chirayil and R. P. Thummel, *Tetrahedron Lett.*, 1990, **31**, 1539.
- 21 D. Munz, J. Chu, M. Melaimi and G. Bertrand, *Angew. Chem. Int. Ed.*, 2016, **55**, 12886.
- 22 S. Hünig, D. Scheutzow, H. Schlaf and H. Pütter, *Liebigs Ann.*, 1974, 1436.
- 23 A. Stanger, *J. Org. Chem.*, 2010, **75**, 2281.
